# Supplementary material for: Novel helix-shape bis[1,2,4]triazolo[4,3-b:3′,4′-f][1,2,4,5]tetrazines: synthesis, optical and charge-transfer properties
Source: Royal Society of Chemistry journal article supplement (doi:10.1039/d3nj05306g), 2023-12-27
Supplement: d3nj05306g1.pdf [file d3nj05306g1.pdf]

## Supporting information

### Novel helix-shape bis[1,2,4]triazolo[4,3-*b*:3',4'-*f*][1,2,4,5]tetrazines: synthesis, optical and charge-transfer properties

Anna V. Korotina,<sup>\*a</sup> Svetlana G. Tolshchina,<sup>a</sup> Denis A. Gazizov,<sup>a</sup> Alexander S. Steparuk,<sup>a</sup> Grigory A. Kim,<sup>a,b</sup> Nadezhda S. Demina,<sup>a</sup> Ilya N. Ganebnykh,<sup>a</sup> Pavel A. Slepukhin,<sup>a</sup> Alexey E. Aleksandrov,<sup>c</sup> Alexey R. Tameev,<sup>c</sup> Gennady L. Rusinov<sup>a</sup>

<sup>a</sup> Postovsky Institute of Organic Synthesis, Ural Branch, Russian Academy of Sciences, S. Kovalevskoy Str., 22, Ekaterinburg, 620990, Russia

\*E-mail: [anny.korotina@gmail.com](mailto:anny.korotina@gmail.com)

<sup>b</sup> Ural Federal University named after the First President of Russia B.N. Yeltsin, Mira Str., 19, Ekaterinburg, 620002, Russia

<sup>c</sup> Frumkin Institute of Physical Chemistry and Electrochemistry, Russian Academy of Sciences, Leninsky prosp., 31, bld.4, Moscow, 119071, Russia

#### Table of content

|                                                                                                                                                                                                                                                        |    |
|--------------------------------------------------------------------------------------------------------------------------------------------------------------------------------------------------------------------------------------------------------|----|
| <b>1. General information</b> .....                                                                                                                                                                                                                    | 2  |
| <b>2. Chemistry</b> .....                                                                                                                                                                                                                              | 3  |
| <b>2.1 General procedure for the synthesis of hydrazones 2a-p.</b> .....                                                                                                                                                                               | 3  |
| <b>2.2 General procedure for the synthesis of bis[1,2,4]triazolo[4,3-<i>b</i>:3',4'-<i>f</i>][1,2,4,5]tetrazines 3a-l,n-p</b> .....                                                                                                                    | 6  |
| <b>2.3 Procedure for the synthesis of 1,7-diphenylimidazo[1,2-<i>b</i>][1,2,4]triazolo[3,4-<i>f</i>][1,2,4,5]tetrazine (5-<i>cis</i>) and 1,7-diphenylimidazo[1,2-<i>b</i>][1,2,4]triazolo[4,3-<i>e</i>][1,2,4,5]tetrazine (5-<i>trans</i>).</b> ..... | 10 |
| <b>2.4 NMR spectra of synthesized compounds</b> .....                                                                                                                                                                                                  | 12 |
| <b>3. X-ray data</b> .....                                                                                                                                                                                                                             | 39 |
| <b>4. Quantum chemical calculations</b> .....                                                                                                                                                                                                          | 40 |
| <b>4.1 DFT calculations</b> .....                                                                                                                                                                                                                      | 40 |
| <b>4.2 TDDFT</b> .....                                                                                                                                                                                                                                 | 46 |
| <b>References</b> .....                                                                                                                                                                                                                                | 64 |

## 1. General information

Synthesis of 3,6-dihydrazino-1,2,4,5-tetrazine (**1**) has been previously described.<sup>1</sup>

All reagents and solvents were obtained from commercial sources and used without further purification. All new compounds were characterized by standard analytic methods. <sup>1</sup>H, <sup>13</sup>C, <sup>19</sup>F NMR spectra were acquired on DRX-400 and Avance 500 instruments (Bruker BioSpin), using DMSO-*d*<sub>6</sub> as solvent. The internal standard was SiMe<sub>4</sub> (for <sup>1</sup>H and <sup>13</sup>C NMR spectra) and C<sub>6</sub>F<sub>6</sub> (for <sup>19</sup>F NMR spectra). <sup>15</sup>N NMR spectra were measured on Avance II 400 instrument (Bruker BioSpin), using DMSO-*d*<sub>6</sub> as solvent, the external standard was NH<sub>3</sub>.

The HRMS analysis was performed using a LC-MS/MS Q-TOF system (Bruker maXis impact HD Q-TOF with Agilent 1260 series LC).

Elemental analysis was performed on a PerkinElmer PE 2400 elemental analyzer.

Melting points were determined in open capillaries on a Stuart SMP3 apparatus (uncorrected).

UV-vis spectra were recorded for 10<sup>-6</sup> M MeCN solutions with a Shimadzu UV-2600 spectrophotometer. UV/vis and fluorescence spectra were recorded using standard 1 cm quartz cells at room temperature. The luminescence and excitation spectra were recorded using a Varian CaryEclipse spectrometer (USA). Excitation was performed at maximum of the more energetic absorption band.

Cyclic voltammetry was carried out on a Metrohm Autolab PGSTAT302N potentiostat with a standard three-electrode configuration. Typically, a three-electrode cell equipped with a platinum disk working electrode (3 mm), a glass carbon disk counter electrode (3 mm), and an Ag/AgNO<sub>3</sub> (0.01 M) reference electrode was used. Measurements were made in dry MeCN with tetrabutylammonium tetrafluoroborate (0.1 M) as the supporting electrolyte under an argon atmosphere at a scan rate of 100 mV/s. The potential of reference electrode was calibrated by using the ferrocene/ferrocenium redox couple (Fc/Fc<sup>+</sup>). The redox potential ( $E_{1/2}$ ) of Fc/Fc<sup>+</sup> against this reference electrode was +125 mV.)

The carrier mobility was determined by the MIS-CELIV method using sandwich-type samples prepared as follows. A glassy substrate was coated with an ITO (mixture of In<sub>2</sub>O<sub>3</sub> and SnO<sub>2</sub>) conductive layer and then with a 70-nm SiO<sub>2</sub> layer. Then, it was successively coated with a layer of the compound under study (layer thickness  $d = 100$  nm) and with an Al layer ( $d = 80$  nm) as a counter electrode. The SiO<sub>2</sub> insulating layer played the role of the blocking layer for both types of charge carriers, i.e., it precluded injection of the charge carriers from ITO. When measuring the transient hole current, a positive potential linearly increasing at a rate of  $A = 5 \cdot 10^4$  V/s was applied to ITO; this was accompanied by the extraction of holes at the Al electrode. To measure the electron mobility, the polarity of the potential applied to the electrode was reversed.

The characteristic time ( $t_{\max}$ ) corresponding to the maximum transient conduction current was determined using the current signal detected at the load resistor of a DL-Analog Discovery (Digilent Co.) oscilloscope. The carrier mobility was calculated using the expression  $\mu = 2d^2/(At_{\max}^2)$ .<sup>2</sup>

DFT calculations were performed using the Orca 5.0.3 program.<sup>3</sup> The ground-state geometry optimizations were performed at the B3LYP/6-311G\* and PBE0/def2-TZVP level of theory in the gas phase. Frequency analyses were carried out at the same theoretical level to ensure that the optimized geometries correspond to a local minimum on the potential energy surface; all compounds were characterized by only real vibrational frequencies. The absorption spectra were calculated by TDDFT at the same theoretical level in MeCN using the SMD solvation model.<sup>4</sup>

X-Ray structural analyses were accomplished on an Xcalibur S four-circle automated diffractometer with CCD detector. Analysis was carried out on standard procedure (graphite monochromated MoK-irradiation, T= 295(2) K,  $\omega$ -scanning with 1 $\sigma$  steps). Solution and refinement of structure was accomplished with using SHELXL-2018/3 program package<sup>5,6</sup> on full-matrix least-squares method on F2, in anisotropic approximation for non-hydrogen atoms. H-atoms are placed in calculated positions and refined in isotropic approximation in “riding” model.

## 2. Chemistry

### 2.1 General procedure for the synthesis of hydrazones 2a-p.

A solution of corresponding aldehyde (2.1 mmol) in 8 ml of EtOH was added to a stirred solution of 3,6-dihydrazino-1,2,4,5-tetrazine (**1**) (1.0 mmol, 142 mg) in 8 ml of acetic acid. The reaction mixture was stirring for 24 hours at ambient temperature, the formed precipitate was filtered off and washed first with water, and then with acetonitrile (**2a-c,f,g,j,p**), ethanol (**2d,h,i,k-m**) or dimethylformamide (**2e,n,o**). An extremely low solubility of products **2** led to difficulties in recording <sup>13</sup>C NMR spectra for some of these compounds.

#### 3,6-Bis(2-benzylidenehydrazinyl)-1,2,4,5-tetrazine (**2a**).

Dark violet solid, 252 mg (79%), m.p. 250-251 °C; <sup>1</sup>H NMR (DMSO-*d*<sub>6</sub>, 400 MHz):  $\delta$ /ppm 7.39 (tt, <sup>3</sup>*J*<sub>HH</sub> = 7.2 Hz, <sup>4</sup>*J*<sub>HH</sub> = 1.3 Hz, 2H, 2C(4)H, 2Ph), 7.45 (ddd, <sup>3</sup>*J*<sub>HH</sub><sup>1</sup> = 7.6, <sup>3</sup>*J*<sub>HH</sub><sup>2</sup> = 7.2 Hz, <sup>4</sup>*J*<sub>HH</sub> = 1.4 Hz, 4H, 2C(3)H, 2C(5)H, 2Ph), 7.71 (dd, <sup>3</sup>*J*<sub>HH</sub> = 7.6 Hz, <sup>4</sup>*J*<sub>HH</sub> = 1.3 Hz, 4H, 2C(2)H, 2C(6)H, 2Ph), 8.23 (s, 2H, 2CH=N), 11.89 (s, 2H, 2NH). Anal. Calcd for C<sub>16</sub>H<sub>14</sub>N<sub>8</sub>: C, 60.37; H, 4.43; N, 35.20; Found C, 59.89; H, 4.26; N, 35.25.

**3,6-Bis(2-(perfluorobenzylidene)hydrazinyl)-1,2,4,5-tetrazine (2b).**

Dark violet solid, 389 mg (78%), m.p. 262-263 °C; <sup>1</sup>H NMR (DMSO-*d*<sub>6</sub>, 400MHz): δ/ppm 8.28 (s, 2H, 2CH=N), 12.33 (br.s, 2H, 2NH). Anal. Calcd for C<sub>16</sub>H<sub>4</sub>F<sub>10</sub>N<sub>8</sub>: C, 38.57; H, 0.81; N, 22.49; Found C, 38.66; H, 0.84; N, 22.61.

**3,6-Bis(2-(4-fluorobenzylidene)hydrazinyl)-1,2,4,5-tetrazine (2c).**

Dark violet solid, 337 mg (95%), m.p. 293-294 °C; <sup>1</sup>H NMR (DMSO-*d*<sub>6</sub>, 500MHz): δ/ppm 7.29 (dd, <sup>3</sup>J<sub>HH</sub> = <sup>3</sup>J<sub>HF</sub> = 8.8 Hz, 4H, 2Ar), 7.76 (dd, <sup>3</sup>J<sub>HH</sub> = 8.8 Hz, <sup>4</sup>J<sub>HF</sub> = 5.6 Hz, 4H, 2Ar), 8.22 (s, 2H, 2CH=N), 11.90 (s, 2H, 2NH). Anal. Calcd for C<sub>16</sub>H<sub>12</sub>F<sub>2</sub>N<sub>8</sub>: C, 54.24; H, 3.41; N, 31.63; Found C, 53.95; H, 3.49; N, 31.71.

**3,6-Bis(2-(4-chlorobenzylidene)hydrazinyl)-1,2,4,5-tetrazine (2d).**

Dark violet solid, 337 mg (87%), m.p. >265 °C (decomp.); <sup>1</sup>H NMR (DMSO-*d*<sub>6</sub>, 500 MHz): δ/ppm 7.51 (d, <sup>3</sup>J<sub>HH</sub> = 8.5 Hz, 4H, 2Ar), 7.73 (d, <sup>3</sup>J<sub>HH</sub> = 8.5 Hz, 4H, 2Ar), 8.22 (s, 2H, 2CH=N), 11.99 (s, 2H, 2NH). Anal. Calcd for C<sub>16</sub>H<sub>12</sub>Cl<sub>2</sub>N<sub>8</sub>: C, 49.63; H, 3.12; N, 28.94; Found C, 49.71; H, 3.18; N, 29.23.

**3,6-Bis(2-(4-bromobenzylidene)hydrazinyl)-1,2,4,5-tetrazine (2e).**

Dark violet solid, 429 mg (90%), m.p. 239-241 °C; <sup>1</sup>H NMR (DMSO-*d*<sub>6</sub>, 400 MHz): δ/ppm 7.64 (d, <sup>3</sup>J<sub>HH</sub> = 9.0 Hz, 4H, 2Ar), 7.67 (d, <sup>3</sup>J<sub>HH</sub> = 9.0 Hz, 4H, 2Ar), 8.20 (s, 2H, 2-CH=N), 12.00 (s, 2H, 2NH). Anal. Calcd for C<sub>16</sub>H<sub>12</sub>Br<sub>2</sub>N<sub>8</sub>: C, 40.36; H, 2.54; N, 23.53; Found C, 40.21; H, 2.47; N, 23.67.

**3,6-Bis(2-(4-nitrobenzylidene)hydrazinyl)-1,2,4,5-tetrazine (2f).**

Dark violet solid, 351 mg (86%), m.p. > 265 °C (decomp.); <sup>1</sup>H NMR (DMSO-*d*<sub>6</sub>, 500 MHz): δ/ppm 7.97 (d, <sup>3</sup>J<sub>HH</sub> = 8.5 Hz, 4H, 2Ar), 8.30 (d, <sup>3</sup>J<sub>HH</sub> = 8.5 Hz, 4H, 2Ar), 8.34 (s, 2H, 2CH=N), 12.38 (s, 2H, 2NH). Anal. Calcd for C<sub>16</sub>H<sub>12</sub>N<sub>10</sub>O<sub>4</sub>: C, 47.06; H, 2.96; N, 34.30; Found C, 47.06; H, 3.05; N, 34.32.

**3,6-Bis(2-(but-2-en-1-ylidene)hydrazinyl)-1,2,4,5-tetrazine (2g).**

Dark violet solid, 207 mg (84%), m.p. 271-272 °C (decomp.); <sup>1</sup>H NMR (DMSO-*d*<sub>6</sub>, 500 MHz): δ/ppm 1.85 (dd, <sup>3</sup>J<sub>HH</sub> = 6.8 Hz, <sup>4</sup>J<sub>HH</sub> = 1.4 Hz, 6H, 2CH<sub>3</sub>), 6.10 (dq, <sup>3</sup>J<sub>HH</sub> = 15.4 Hz, <sup>3</sup>J<sub>HH</sub> = 6.8 Hz, 2H, 2CH<sub>3</sub>CH=CH), 6.25 (ddq, <sup>3</sup>J<sub>HH</sub> = 15.4 Hz, <sup>3</sup>J<sub>HH</sub> = 9.3 Hz, <sup>4</sup>J<sub>HH</sub> = 1.4 Hz, 2H, 2CH<sub>3</sub>CH=CH), 7.82 (d, <sup>3</sup>J<sub>HH</sub> = 9.3 Hz, 2H, 2CH=N), 11.46 (s, 2H, 2NH); <sup>13</sup>C NMR (DMSO-*d*<sub>6</sub>, 125MHz): δ/ppm 18.3, 128.9, 135.5, 145.8, 159.7. Anal. Calcd for C<sub>10</sub>H<sub>14</sub>N<sub>8</sub>: C, 48.77; H, 5.73; N, 45.50; Found C, 48.75; H, 5.91; N, 45.31.

**3,6-Bis(2-(4-acetamidobenzylidene)hydrazinyl)-1,2,4,5-tetrazine (2h).**

Dark violet solid, 368 mg (85%), m.p. 281-282 °C; <sup>1</sup>H NMR (DMSO-*d*<sub>6</sub>, 500 MHz): δ/ppm 2.06 (s, 6H, 2CH<sub>3</sub>), 7.62 (d, <sup>3</sup>J<sub>HH</sub> = 8.7 Hz, 4H, 2Ar), 7.66 (d, <sup>3</sup>J<sub>HH</sub> = 8.7 Hz, 4H, 2Ar), 8.16 (s, 2H, 2CH=N), 10.10 (s, 2H, 2NHCO), 11.76 (s, 2H, 2NH); <sup>13</sup>C NMR (DMSO-*d*<sub>6</sub>, 125MHz): δ/ppm 24.1, 118.9, 127.0, 129.4, 140.3, 143.1, 159.9, 168.4. Anal. Calcd for C<sub>20</sub>H<sub>20</sub>N<sub>10</sub>O<sub>2</sub>: C, 55.55; H, 4.66; N, 32.39; Found C, 55.42; H, 4.80; N, 32.46.

**3,6-Bis(2-(4-isopropylbenzylidene)hydrazinyl)-1,2,4,5-tetrazine (2i).**

Dark violet solid, 290 mg (72%), m.p. 283-285 °C; <sup>1</sup>H NMR (DMSO-*d*<sub>6</sub>, 500 MHz): δ/ppm 1.22 (d, <sup>3</sup>J<sub>HH</sub> = 6.9 Hz, 12H, 2 CH(CH<sub>3</sub>)<sub>2</sub>), 2.92 (hept, <sup>3</sup>J<sub>HH</sub> = 6.9 Hz, 2H, 2 CH(CH<sub>3</sub>)<sub>2</sub>), 7.32 (d, <sup>3</sup>J<sub>HH</sub> = 8.2 Hz, 4H, 2Ar), 7.63 (d, <sup>3</sup>J<sub>HH</sub> = 8.2 Hz, 4H, 2Ar), 8.20 (s, 2H, 2CH=N), 11.79 (s, 2H, 2NH); <sup>13</sup>C NMR (DMSO-*d*<sub>6</sub>, 125MHz): δ/ppm 23.7, 33.3, 126.5, 126.7, 132.5, 143.3, 149.8, 159.9. Anal. Calcd for C<sub>22</sub>H<sub>26</sub>N<sub>8</sub>: C, 65.65; H, 6.51; N, 27.84; Found C, 65.44; H, 6.79; N, 28.06.

**3,6-Bis(2-(4-methoxybenzylidene)hydrazinyl)-1,2,4,5-tetrazine (2j).**

Dark violet solid, 330 mg (87%), m.p. 262-263 °C; <sup>1</sup>H NMR (DMSO-*d*<sub>6</sub>, 500 MHz): δ/ppm 3.81 (s, 6H, 2OCH<sub>3</sub>), 7.01 (d, <sup>3</sup>J<sub>HH</sub> = 8.8 Hz, 4H, 2Ar), 7.64 (d, <sup>3</sup>J<sub>HH</sub> = 8.8 Hz, 4H, 2Ar), 8.17 (s, 2H, 2CH=N), 11.70 (s, 2H, 2NH). Anal. Calcd for C<sub>18</sub>H<sub>18</sub>N<sub>8</sub>O<sub>2</sub>: C, 57.14; H, 4.79; N, 29.61; Found C, 56.79; H, 4.75; N, 29.94.

**3,6-Bis(2-(3-methoxybenzylidene)hydrazinyl)-1,2,4,5-tetrazine (2k).**

Dark violet solid, 247 mg (65%), m.p. 214 °C (decomp.); <sup>1</sup>H NMR (DMSO-*d*<sub>6</sub>, 500 MHz): δ/ppm 3.81 (s, 6H, 2OCH<sub>3</sub>), 6.96 – 6.98 (m, 2H, 2Ar), 7.26-7.28 (m, 4H, 2Ar), 7.34-7.38 (m, 2H, 2Ar), 8.20 (s, 2H, 2CH=N), 11.90 (s, 2H, 2NH). Anal. Calcd for C<sub>18</sub>H<sub>18</sub>N<sub>8</sub>O<sub>2</sub>: C, 57.14; H, 4.79; N, 29.61; Found C, 56.84; H, 4.77; N, 30.06.

**3,6-Bis(2-(2,3-dimethoxybenzylidene)hydrazinyl)-1,2,4,5-tetrazine (2l).**

Dark red solid, 418 mg (95%), m.p. 226-228 °C; <sup>1</sup>H NMR (DMSO-*d*<sub>6</sub>, 500 MHz): δ/ppm 3.79 (s, 6H, 2OCH<sub>3</sub>), 3.84 (s, 6H, 2OCH<sub>3</sub>), 7.06-7.08 (m, 2H, 2Ar), 7.13-7.15 (m, 2H, 2Ar), 7.47-7.49 (m, 2H, 2Ar), 8.51 (s, 2H, 2CH=N), 11.87 (s, 2H, 2NH); <sup>13</sup>C NMR (DMSO-*d*<sub>6</sub>, 125MHz): δ/ppm 55.7, 61.1, 113.4, 116.7, 124.3, 128.2, 138.9, 147.3, 152.7, 159.9. Anal. Calcd for C<sub>20</sub>H<sub>22</sub>N<sub>8</sub>O<sub>4</sub>: C, 54.79; H, 5.06; N, 25.56; Found C, 54.71; H, 5.07; N, 25.69.

**3,6-Bis(2-(4-hydroxy-3,5-dimethoxybenzylidene)hydrazinyl)-1,2,4,5-tetrazine (2m).**

Brown solid, 406 mg (86%), m.p. 240 °C (decomp.); <sup>1</sup>H NMR (DMSO-*d*<sub>6</sub>, 500 MHz): δ/ppm 3.82 (s, 12H, 4OCH<sub>3</sub>), 6.96 (s, 4H, 2Ar), 8.11 (s, 2H, 2CH=N), 8.79 (s, 2H, 2OH), 11.68 (s, 2H,

2NH);  $^{13}\text{C}$  NMR (DMSO- $d_6$ , 125MHz):  $\delta$ /ppm 56.0, 104.0, 125.1, 137.2, 144.0, 148.1, 159.8. Anal. Calcd for  $\text{C}_{20}\text{H}_{22}\text{N}_8\text{O}_6$ : C, 51.06; H, 4.71; N, 23.82; Found C, 50.88; H, 4.81; N, 23.86.

### **3,6-Bis(2-(9H-fluoren-2-ylmethylidene)hydrazinyl)-1,2,4,5-tetrazine (2n).**

Dark violet solid, 317 mg (64%), m.p. 303-305 °C;  $^1\text{H}$  NMR (DMSO- $d_6$ , 400 MHz):  $\delta$ /ppm 4.00 (s, 4H, 2CH<sub>2</sub>), 7.33-7.37 (m, 2H, 2Ar), 7.40-7.44 (m, 2H, 2Ar), 7.61-7.64 (m, 2H, 2Ar), 7.71-7.74 (m, 2H, 2Ar), 7.93-7.99 (m, 6H, 2Ar), 8.32 (s, 2H, 2CH=N), 11.91 (s, 2H, 2NH). Anal. Calcd for  $\text{C}_{30}\text{H}_{22}\text{N}_8$ : C, 72.86; H, 4.48; N, 22.66; Found C, 72.54; H, 4.49; N, 22.58.

### **3,6-Bis(2-(thiophen-2-ylmethylidene)hydrazinyl)-1,2,4,5-tetrazine (2o).**

Dark violet solid, 295 mg (89%), m.p. 254-255 °C;  $^1\text{H}$  NMR (DMSO- $d_6$ , 400 MHz):  $\delta$ /ppm 7.12 (dd,  $^3J_{HH} = 5.1$  Hz,  $^3J_{HH}^2 = 3.7$  Hz, 2H, 2C(4)H in 2 thiophen-2-yls), 7.39 (dd,  $^3J_{HH} = 3.7$  Hz,  $^4J_{HH} = 1.2$  Hz, 2H, 2CH in 2 thiophen-2-yls), 7.61 (d,  $^3J_{HH} = 5.1$  Hz, 2H, 2CH in 2 thiophen-2-yls), 8.42 (s, 2H, 2CH=N), 11.85 (s, 2H, 2NH). Anal. Calcd for  $\text{C}_{12}\text{H}_{10}\text{N}_8\text{S}_2$ : C, 43.62; H, 3.05; N, 33.92; S, 19.41; Found C, 43.61; H, 3.09; N, 34.04; S, 19.52.

### **3,6-Bis(2-(thiophen-3-ylmethylidene)hydrazinyl)-1,2,4,5-tetrazine (2p).**

Dark violet solid, 298 mg (90%), m.p. 247-248 °C;  $^1\text{H}$  NMR (DMSO- $d_6$ , 400 MHz):  $\delta$ /ppm 7.48 (dd,  $^3J_{HH} = 5.0$  Hz,  $^4J_{HH} = 1.2$  Hz, 2H, 2C(4)H in 2 thiophen-3-yls), 7.62 (dd,  $^3J_{HH} = 5.0$  Hz,  $^4J_{HH} = 2.9$  Hz, 2H, 2C(5)H in 2 thiophen-3-yls), 7.84 (dd,  $^4J_{HH} = 2.9$  Hz,  $^4J_{HH}^2 = 1.2$  Hz, 2H, 2C(2)H in 2 thiophen-3-yls), 8.27 (s, 2H, 2CH=N), 11.72 (s, 2H, 2NH). Anal. Calcd for  $\text{C}_{12}\text{H}_{10}\text{N}_8\text{S}_2$ : C, 43.62; H, 3.05; N, 33.92; S, 19.41; Found C, 43.65; H, 3.01; N, 33.93; S, 19.28.

## **2.2 General procedure for the synthesis of bis[1,2,4]triazolo[4,3-*b*:3',4'-*f*][1,2,4,5]tetrazines 3a-l,n-p**

An oxidizing agent (**Table S1**) was added to an 80°C solution of the starting hydrazine **2** (1.0 mmol) in portions of 0.5 mmol at intervals of 15 min with constant stirring. Then the reaction mixture was heated for another 30 minutes until the initial compound completely disappeared (control by TLC) and after that cooled to room temperature. The resulting precipitate (**3c,d,f,g,h,j,l**) was filtered off and washed with  $\text{CHCl}_3$ ; if there was no precipitate, the reaction mixture was evaporated to dryness and the residue was washed with  $\text{CHCl}_3$  (**3a,e,i,k,n**). Purification of compounds **3b,o,p** is described below.

**Table S1.** Reaction conditions for compound **3** synthesis

| Starting compound | Product   | Oxidizing agent (mmol) | Solvent (ml)                             |
|-------------------|-----------|------------------------|------------------------------------------|
| <b>2a</b>         | <b>3a</b> | PIDA* (3.0 mmol)       | MeCN / DMF (3:1) (20 ml)                 |
| <b>2b</b>         | <b>3b</b> | PIDA (3.0 mmol)        | MeCN (20 ml)                             |
| <b>2c</b>         | <b>3c</b> | PIDA (3.0 mmol)        | MeCN (20 ml)                             |
| <b>2d</b>         | <b>3d</b> | PIDA (3.0 mmol)        | MeCN (20 ml)                             |
| <b>2e</b>         | <b>3e</b> | PIDA (3.0 mmol)        | MeCN / DMF (3:1) (20 ml)                 |
| <b>2f</b>         | <b>3f</b> | PIFA** (2.0 mmol)      | MeCN (15 ml)                             |
| <b>2g</b>         | <b>3g</b> | PIDA (3.0 mmol)        | MeCN (20 ml)                             |
| <b>2h</b>         | <b>3h</b> | PIDA (3.0 mmol)        | MeCN / DMF (3:1) (20 ml)                 |
| <b>2i</b>         | <b>3i</b> | PIDA (3.0 mmol)        | MeCN (20 ml)                             |
| <b>2j</b>         | <b>3j</b> | PIDA (5.0 mmol)        | MeCN (20 ml)                             |
| <b>2k</b>         | <b>3k</b> | PIDA (3.0 mmol)        | MeCN / DMF (3:1) (20 ml)                 |
| <b>2l</b>         | <b>3l</b> | PIDA (3.0 mmol)        | MeCN (20 ml)                             |
| <b>2m</b>         | -         | PIDA (3.0 mmol)        | MeCN (20 ml)                             |
| <b>2n</b>         | <b>3n</b> | PIDA (5.0 mmol)        | MeCN / DMF (3:1) (20 ml)                 |
| <b>2o</b>         | <b>3o</b> | PIDA (5.0 mmol)        | MeCN (15 ml), NMP*** (5 ml), AcOH (5 ml) |
| <b>2p</b>         | <b>3p</b> | PIDA (3.0 mmol)        | MeCN / DMF (3:1) (20 ml)                 |

\* (diacetoxyiodo)benzene; \*\* (bis(trifluoroacetoxy)iodo)benzene; \*\*\* *N*-methyl-2-pyrrolidone

### 1,8-Di(phenyl)bis[1,2,4]triazolo[4,3-*b*:3',4'-*f*][1,2,4,5]tetrazine (**3a**).

Yellow solid, 160 mg (51%), m.p. 250 °C (decomp.); <sup>1</sup>H NMR (DMSO-*d*<sub>6</sub>, 500 MHz): δ/ppm 7.10 (dd, <sup>3</sup>*J*<sub>HH</sub> = 7.7, <sup>3</sup>*J*<sub>HH</sub> = 7.2 Hz, 4H, 2C(3)H, 2C(5)H, 2Ph), 7.21 (t, <sup>3</sup>*J*<sub>HH</sub> = 7.7 Hz, 2H, 2C(4)H, 2Ph), 7.47 (d, <sup>3</sup>*J*<sub>HH</sub> = 7.2 Hz, 4H, 2C(2)H, 2C(6)H, 2Ph); <sup>13</sup>C NMR (DMSO-*d*<sub>6</sub>, 125MHz): δ/ppm 125.2, 128.5, 129.0, 131.2, 145.7, 151.2. Anal. Calcd for C<sub>16</sub>H<sub>10</sub>N<sub>8</sub>: C, 61.14; H, 3.21; N, 35.65; Found C, 60.80; H, 3.20; N, 35.34. HRMS (APSI): Found *m/z* = 314.1034 (M<sup>-</sup>). C<sub>16</sub>H<sub>10</sub>N<sub>8</sub><sup>-</sup>. Calculated 314.1036 (M<sup>-</sup>).

### 1,8-Di(perfluorophenyl)bis[1,2,4]triazolo[4,3-*b*:3',4'-*f*][1,2,4,5]tetrazine (**3b**).

The reaction mixture was evaporated to dryness and the product **3b** was purified by column chromatography using silica gel 60 (230-400 mesh) and EtOAc : C<sub>6</sub>H<sub>14</sub> (1:1) as eluent (R<sub>f</sub> = 0.9).

Light yellow solid, 173 mg (35%), m.p. 225 °C (decomp.); <sup>19</sup>F NMR (DMSO-*d*<sub>6</sub>, 471 MHz): δ/ppm 3.55-3.68 (m, 4F, 2C<sub>6</sub>F<sub>5</sub>), 17.63-17.73 (m, 2F, 2C<sub>6</sub>F<sub>5</sub>), 27.03-27.08 (m, 4F, 2C<sub>6</sub>F<sub>5</sub>); <sup>13</sup>C NMR (DMSO-*d*<sub>6</sub>, 125MHz): δ/ppm 101.3 (tt, <sup>2</sup>*J*<sub>CF</sub> = 17 Hz, <sup>3</sup>*J*<sub>CF</sub> = 4 Hz), 137.2 (dddd, <sup>1</sup>*J*<sub>CF</sub> = 252 Hz, <sup>2</sup>*J*<sub>CF</sub> = <sup>2</sup>*J*<sub>CF</sub> = 13 Hz, <sup>3</sup>*J*<sub>CF</sub> = 5 Hz), 143.4 (dt, <sup>1</sup>*J*<sub>CF</sub> = 261 Hz, <sup>2</sup>*J*<sub>CF</sub> = 13 Hz, <sup>3</sup>*J*<sub>CF</sub> = 4 Hz), 144.9 (dddd, <sup>1</sup>*J*<sub>CF</sub> = 256 Hz, <sup>2</sup>*J*<sub>CF</sub> = 13 Hz, <sup>3</sup>*J*<sub>CF</sub> = <sup>3</sup>*J*<sub>CF</sub> = 4 Hz), 150.7. Anal. Calcd for C<sub>16</sub>F<sub>10</sub>N<sub>8</sub>: C, 38.88; H, 0; N, 22.67; Found C, 38.80; H, 0; N, 22.48. HRMS (APSI): Found *m/z* = 494.0096 (M<sup>-</sup>). C<sub>16</sub>F<sub>10</sub>N<sub>8</sub><sup>-</sup>. Calculated 494.0092 (M<sup>-</sup>).

**1,8-Di(4-fluorophenyl)bis[1,2,4]triazolo[4,3-*b*:3',4'-*f*][1,2,4,5]tetrazine (3c).**

Yellow solid, 166 mg (47%), m.p. >300 °C (decomp.); <sup>1</sup>H NMR (DMSO-*d*<sub>6</sub>, 400MHz): δ/ppm 7.02 (dd, <sup>3</sup>*J*<sub>HH</sub> = <sup>3</sup>*J*<sub>HF</sub> = 8.8 Hz, 4H, 2Ar), 7.55 (dd, <sup>3</sup>*J*<sub>HH</sub> = 8.8 Hz, <sup>4</sup>*J*<sub>HF</sub> = 5.3 Hz, 4H, 2Ar); <sup>13</sup>C NMR (DMSO-*d*<sub>6</sub>, 125MHz): δ/ppm 115.9 (d, <sup>2</sup>*J*<sub>CF</sub> = 23 Hz), 121.6 (d, <sup>4</sup>*J*<sub>CF</sub> = 3 Hz), 132.1 (d, <sup>3</sup>*J*<sub>CF</sub> = 10 Hz), 144.7, 151.1, 163.5 (d, <sup>1</sup>*J*<sub>CF</sub> = 250 Hz); <sup>15</sup>N NMR (DMSO-*d*<sub>6</sub>, 41 MHz): δ/ppm 172.8, 320.4, 325.6 414.2. Anal. Calcd for C<sub>16</sub>H<sub>8</sub>F<sub>2</sub>N<sub>8</sub>: C, 54.86; H, 2.30; N, 31.99; Found C, 54.81; H, 2.34; N, 32.08. HRMS (APSI): Found *m/z* = 350.0847 (M<sup>-</sup>). C<sub>16</sub>H<sub>8</sub>F<sub>2</sub>N<sub>8</sub><sup>-</sup>. Calculated 350.0845 (M<sup>-</sup>).

**1,8-Di(4-chlorophenyl)bis[1,2,4]triazolo[4,3-*b*:3',4'-*f*][1,2,4,5]tetrazine (3d).**

Yellow solid, 200 mg (52%), m.p. >265 °C (decomp.); <sup>1</sup>H NMR (DMSO-*d*<sub>6</sub>, 500MHz): δ/ppm 7.24 (d, <sup>3</sup>*J*<sub>HH</sub> = 8.5 Hz, 4H, 2Ar), 7.49 (d, <sup>3</sup>*J*<sub>HH</sub> = 8.5 Hz, 4H, 2Ar); <sup>13</sup>C NMR (DMSO-*d*<sub>6</sub>, 125 MHz): δ/ppm 123.8, 128.8, 131.1, 136.8, 144.7, 151.1. Anal. Calcd for C<sub>16</sub>H<sub>8</sub>Cl<sub>2</sub>N<sub>8</sub>: C, 50.15; H, 2.10; N, 29.24; Found C, 49.88; H, 2.36; N, 28.97. HRMS (APSI): Found *m/z* = 382.0259 (M<sup>-</sup>). C<sub>16</sub>H<sub>8</sub>Cl<sub>2</sub>N<sub>8</sub><sup>-</sup>. Calculated 382.0254 (M<sup>-</sup>).

**1,8-Di(4-bromophenyl)bis[1,2,4]triazolo[4,3-*b*:3',4'-*f*][1,2,4,5]tetrazine (3e).**

Yellow solid, 236 mg (50%), m.p. >300 °C; <sup>1</sup>H NMR (DMSO-*d*<sub>6</sub>, 400 MHz): δ/ppm 7.40 (d, <sup>3</sup>*J*<sub>HH</sub> = 9.0 Hz, 4H, 2Ar), 7.43 (d, <sup>3</sup>*J*<sub>HH</sub> = 9.0 Hz, 4H, 2Ar); <sup>13</sup>C NMR (DMSO-*d*<sub>6</sub>, 125 MHz): δ/ppm 124.1, 125.8, 131.1, 131.8, 144.8, 151.1. <sup>15</sup>N NMR (DMSO-*d*<sub>6</sub>, 41 MHz): δ/ppm 172.6, 321.0, 326.3, 415.1. Anal. Calcd for C<sub>16</sub>H<sub>8</sub>Br<sub>2</sub>N<sub>8</sub>: C, 40.71; H, 1.71; N, 23.74; Found C, 40.77; H, 1.66; N, 23.53. HRMS (APSI): Found *m/z* = 469.9245 (M<sup>-</sup>). C<sub>16</sub>H<sub>8</sub>Br<sub>2</sub>N<sub>8</sub><sup>-</sup>. Calculated 469.9244 (M<sup>-</sup>).

**1,8-Di(4-nitrophenyl)bis[1,2,4]triazolo[4,3-*b*:3',4'-*f*][1,2,4,5]tetrazine (3f).**

Yellow solid, 183 mg (45%), m.p. > 280 °C (decomp.); <sup>1</sup>H NMR (DMSO-*d*<sub>6</sub>, 500 MHz): δ/ppm 7.79 (d, <sup>3</sup>*J*<sub>HH</sub> = 8.5 Hz, 4H, 2Ar), 7.95 (d, <sup>3</sup>*J*<sub>HH</sub> = 8.5 Hz, 4H, 2Ar); <sup>13</sup>C NMR (DMSO-*d*<sub>6</sub>, 125 MHz): δ/ppm 123.7, 130.7, 131.2, 143.8, 148.4, 151.1. Anal. Calcd for C<sub>16</sub>H<sub>8</sub>N<sub>10</sub>O<sub>4</sub>: C, 47.53; H, 1.99; N, 34.64; Found C, 47.30; H, 1.76; N, 34.61. HRMS (APSI): Found *m/z* = 404.0737 (M<sup>-</sup>). C<sub>16</sub>H<sub>8</sub>N<sub>10</sub>O<sub>4</sub><sup>-</sup>. Calculated 404.0735 (M<sup>-</sup>).

**1,8-Di(propen-1-yl)bis[1,2,4]triazolo[4,3-*b*:3',4'-*f*][1,2,4,5]tetrazine (3g).**

Yellow solid, 119 mg (49%), m.p. 290 °C (decomp.); <sup>1</sup>H NMR (DMSO-*d*<sub>6</sub>, 500 MHz): δ/ppm 2.08 (dd, <sup>3</sup>*J*<sub>HH</sub> = 6.8 Hz, <sup>4</sup>*J*<sub>HH</sub> = 1.7 Hz, 6H, 2CH<sub>3</sub>), 6.76 (dq, <sup>3</sup>*J*<sub>HH</sub> = 15.6 Hz, <sup>4</sup>*J*<sub>HH</sub> = 1.7 Hz, 2H, 2CH<sub>3</sub>CH=CH), 6.99 (dq, <sup>3</sup>*J*<sub>HH</sub> = 15.6 Hz, <sup>3</sup>*J*<sub>HH</sub> = 6.8 Hz, 2H, 2CH<sub>3</sub>CH=CH); <sup>13</sup>C NMR (DMSO-*d*<sub>6</sub>, 125MHz): δ/ppm 18.9, 115.1, 141.4, 143.4, 150.1. Anal. Calcd for C<sub>10</sub>H<sub>10</sub>N<sub>8</sub>: C, 49.58;



H, 4.16; N, 46.26; Found C, 49.59; H, 4.25; N, 46.41. HRMS (APSI): Found  $m/z = 242.1037$  ( $M^-$ ).  $C_{10}H_{10}N_8^-$ . Calculated 242.1034 ( $M^-$ ).

**1,8-Di(4-acetamidophenyl)bis[1,2,4]triazolo[4,3-*b*:3',4'-*f*][1,2,4,5]tetrazine (3h).**

Yellow solid, 122 mg (28%), m.p. >300 °C;  $^1H$  NMR (DMSO- $d_6$ , 500 MHz):  $\delta$ /ppm 2.04 (s, 6H, CH<sub>3</sub>), 7.30 (d,  $^3J_{HH} = 8.8$  Hz, 4H, 2Ar), 7.34 (d,  $^3J_{HH} = 8.8$  Hz, 4H, 2Ar), 9.98 (s, 2H, 2NH);  $^{13}C$  NMR (DMSO- $d_6$ , 125MHz):  $\delta$ /ppm 24.1, 118.2, 118.9, 129.8, 141.8, 145.8, 151.2, 168.4. Anal. Calcd for  $C_{20}H_{16}N_{10}O_2$ : C, 56.07; H, 3.76; N, 32.69; Found C, 55.93; H, 3.64; N, 32.41. HRMS (APSI): Found  $m/z = 428.1460$  ( $M^-$ ).  $C_{20}H_{16}N_{10}O_2^-$ . Calculated 428.1463 ( $M^-$ ).

**1,8-Di(4-isopropylphenyl)bis[1,2,4]triazolo[4,3-*b*:3',4'-*f*][1,2,4,5]tetrazine (3i).**

Yellow solid, 211 mg (53%), m.p. 280-285 °C (decomp.);  $^1H$  NMR (DMSO- $d_6$ , 500 MHz):  $\delta$ /ppm 1.10 (d,  $^3J_{HH} = 7.0$  Hz, 12H, 2 CH(CH<sub>3</sub>)<sub>2</sub>), 2.74 (hept,  $^3J_{HH} = 7.0$  Hz, 2H, 2 CH(CH<sub>3</sub>)<sub>2</sub>), 7.00 (d,  $^3J_{HH} = 8.0$  Hz, 4H, 2Ar), 7.41 (d,  $^3J_{HH} = 8.0$  Hz, 4H, 2Ar).  $^{13}C$  NMR (DMSO- $d_6$ , 126 MHz):  $\delta$ /ppm 23.1, 33.0, 122.6, 126.4, 129.0, 145.8, 151.1, 151.4. Anal. Calcd for  $C_{22}H_{22}N_8$ : C, 66.31; H, 5.57; N, 28.12; Found C, 65.96; H, 5.75; N, 28.27. HRMS (APSI): Found  $m/z = 398.1979$  ( $M^-$ ).  $C_{22}H_{22}N_8^-$ . Calculated 398.1973 ( $M^-$ ).

**1,8-Di(4-methoxyphenyl)bis[1,2,4]triazolo[4,3-*b*:3',4'-*f*][1,2,4,5]tetrazine (3j).**

Yellow solid, 147 mg (39%), m.p. 252-255 °C (decomp.);  $^1H$  NMR (DMSO- $d_6$ , 500 MHz):  $\delta$ /ppm 3.73 (s, 6H, 2OCH<sub>3</sub>), 6.62-6.67 (m, 4H, 2Ar), 7.36-7.41 (m, 4H, 2Ar).  $^{13}C$  NMR (DMSO- $d_6$ , 126 MHz):  $\delta$ /ppm 55.2, 114.1, 117.2, 130.9, 145.8, 151.2, 161.0. Anal. Calcd for  $C_{18}H_{14}N_8O_2$ : C, 57.75; H, 3.77; N, 29.93; Found C, 57.36; H, 3.66; N, 29.57. HRMS (APSI): Found  $m/z = 374.1251$  ( $M^-$ ).  $C_{18}H_{14}N_8O_2^-$ . Calculated 374.1245 ( $M^-$ ).

**1,8-Di(3-methoxyphenyl)bis[1,2,4]triazolo[4,3-*b*:3',4'-*f*][1,2,4,5]tetrazine (3k).**

Yellow solid, 244 mg (65%), m.p. 250 °C (decomp.);  $^1H$  NMR (DMSO- $d_6$ , 500 MHz):  $\delta$ /ppm 3.66 (s, 6H, 2OCH<sub>3</sub>), 6.75 – 6.80 (m, 2H, 2Ar), 6.94 (s, 2H, 2Ar), 7.10-7.17 (m, 4H, 2Ar);  $^{13}C$  NMR (DMSO- $d_6$ , 126 MHz):  $\delta$ /ppm 55.0, 113.9, 117.1, 121.1, 126.4, 129.9, 145.5, 151.1, 158.4;  $^{15}N$  NMR (DMSO- $d_6$ , 41 MHz):  $\delta$ /ppm 172.5, 320.0, 325.4, 413.9. Anal. Calcd for  $C_{18}H_{14}N_8O_2$ : C, 57.75; H, 3.77; N, 29.93; Found C, 57.56; H, 3.76; N, 29.87. HRMS (APSI): Found  $m/z = 374.1249$  ( $M^-$ ).  $C_{18}H_{14}N_8O_2^-$ . Calculated 374.1245 ( $M^-$ ).

**1,8-Di(2,3-dimethoxyphenyl)bis[1,2,4]triazolo[4,3-*b*:3',4'-*f*][1,2,4,5]tetrazine (3l).**

Dark yellow solid, 169 mg (39%), m.p. 310-315 °C (decomp.);

**A:**  $^1\text{H}$  NMR (DMSO- $d_6$ , 500 MHz):  $\delta$ /ppm 3.37 (s, 6H, 2OCH<sub>3</sub>), 3.69 (s, 6H, 2OCH<sub>3</sub>), 6.87-6.89 (m, 2H, 2Ar), 6.96-7.01 (m, 4H, 2Ar);  $^{13}\text{C}$  NMR (DMSO- $d_6$ , 125MHz):  $\delta$ /ppm 55.5, 60.9, 116.0, 120.0, 121.9, 123.7, 143.2, 146.5, 150.4, 150.9.

**B:**  $^1\text{H}$  NMR (DMSO- $d_6$ , 500 MHz):  $\delta$ /ppm 3.62 (s, 6H, 2OCH<sub>3</sub>), 3.75 (s, 6H, 2OCH<sub>3</sub>), 6.73-6.76 (m, 2H, 2Ar), 6.83-6.85 (m, 2H, 2Ar), 6.87-6.89 (m, 2H, 2Ar);  $^{13}\text{C}$  NMR (DMSO- $d_6$ , 125MHz):  $\delta$ /ppm 55.6, 60.8, 116.0, 119.9, 122.1, 123.4, 143.1, 146.6, 150.6, 151.4.

Anal. Calcd for C<sub>20</sub>H<sub>18</sub>N<sub>8</sub>O<sub>4</sub>: C, 55.30; H, 4.18; N, 25.79; Found C, 55.09; H, 4.11; N, 25.65. HRMS (APSI): Found  $m/z$  = 434.1463 (M<sup>-</sup>). C<sub>20</sub>H<sub>18</sub>N<sub>8</sub>O<sub>4</sub><sup>-</sup>. Calculated 434.1456 (M<sup>-</sup>).

### **1,8-Di(9H-fluoren-2-yl)bis[1,2,4]triazolo[4,3-*b*:3',4'-*f*][1,2,4,5]tetrazine (3n).**

Yellow solid, 173 mg (35%), m.p. 350 °C (decomp.);  $^1\text{H}$  NMR (DMSO- $d_6$ , 400 MHz):  $\delta$ /ppm 3.56 (s, 4H, 2CH<sub>2</sub>), 6.99-7.03 (m, 2H, 2Ar), 7.13-7.21 (m, 4H, 2Ar), 7.32-7.35 (m, 2H, 2Ar), 7.46 (d,  $^3J_{HH} = 7.9$  Hz, 2H, 2Ar), 7.50-7.58 (m, 4H, 2Ar);  $^{13}\text{C}$  NMR (DMSO- $d_6$ , 126 MHz):  $\delta$ /ppm 36.0, 119.5, 119.8, 122.9, 124.3, 125.4, 126.4, 127.3, 127.9, 139.1, 142.7, 142.9, 143.7, 146.1, 151.2. Anal. Calcd for C<sub>30</sub>H<sub>18</sub>N<sub>8</sub>: C, 73.46; H, 3.70; N, 22.84; Found C, 73.13; H, 3.85; N, 22.52. HRMS (APSI): Found  $m/z$  = 490.1660 (M<sup>-</sup>). C<sub>30</sub>H<sub>18</sub>N<sub>8</sub><sup>-</sup>. Calculated 490.1660 (M<sup>-</sup>).

### **1,8-Di(thiophen-2-yl)bis[1,2,4]triazolo[4,3-*b*:3',4'-*f*][1,2,4,5]tetrazine (3o).**

The reaction mixture was evaporated and the product **3o** was purified by column chromatography using silica gel 60 (230-400 mesh) and C<sub>6</sub>H<sub>6</sub> : MeCN (1:1) as eluent (R<sub>f</sub> = 0.8).

Orange solid, 30 mg (9%), m.p. 237-240 °C (decomp.);  $^1\text{H}$  NMR (DMSO- $d_6$ , 500 MHz):  $\delta$ /ppm 6.79 (dd,  $^3J'_{HH} = 5.0$  Hz,  $^3J_{HH} = 3.7$  Hz, 2H, 2C(4)H in 2 thiophen-2-yls), 7.27 (dd,  $^3J_{HH} = 3.7$  Hz,  $^4J_{HH} = 1.2$  Hz, 2H, 2CH in 2 thiophen-2-yls), 7.72 (dd,  $^3J_{HH} = 5.0$  Hz,  $^4J_{HH} = 1.2$  Hz, 2H, 2CH in 2 thiophen-2-yls);  $^{13}\text{C}$  NMR (DMSO- $d_6$ , 126 MHz):  $\delta$ /ppm 124.6, 128.4, 132.0, 132.5, 141.4, 151.2. Anal. Calcd for C<sub>12</sub>H<sub>6</sub>N<sub>8</sub>S<sub>2</sub>: C, 44.16; H, 1.85; N, 34.33; Found C, 43.92; H, 1.74; N, 34.21. HRMS (APCI): Found  $m/z$  = 326.0161 (M<sup>-</sup>). C<sub>12</sub>H<sub>6</sub>N<sub>8</sub>S<sub>2</sub><sup>-</sup>. Calculated 326.0162 (M<sup>-</sup>).

### **1,8-Di(thiophen-3-yl)bis[1,2,4]triazolo[4,3-*b*:3',4'-*f*][1,2,4,5]tetrazine (3p).**

The reaction mixture was evaporated and the residue was washed with CHCl<sub>3</sub> and then recrystallized from MeCN.

Yellow solid, 131 mg (40%), m.p. 285-288 °C (decomp.);  $^1\text{H}$  NMR (DMSO- $d_6$ , 500 MHz):  $\delta$ /ppm 7.11 (dd,  $^3J_{HH} = 5.0$  Hz,  $^4J_{HH} = 1.3$  Hz, 2H, 2C(4)H in 2 thiophen-3-yls), 7.40 (dd,  $^3J_{HH} = 5.0$  Hz,  $^4J_{HH} = 2.9$  Hz, 2H, 2C(5)H in 2 thiophen-3-yls), 7.98 (dd,  $^4J'_{HH} = 2.9$  Hz,  $^4J_{HH} = 1.3$  Hz, 2H, 2C(2)H in 2 thiophen-3-yls);  $^{13}\text{C}$  NMR (DMSO- $d_6$ , 126 MHz):  $\delta$ /ppm 125.1, 126.9, 127.8, 130.6, 142.2, 151.0. Anal. Calcd for C<sub>12</sub>H<sub>6</sub>N<sub>8</sub>S<sub>2</sub>: C, 44.16; H, 1.85; N, 34.33; Found C, 43.99; H,

1.80; N, 34.00. HRMS (APCI): Found  $m/z = 326.0162$  ( $M^-$ ).  $C_{12}H_6N_8S_2^-$ . Calculated 326.0162 ( $M^-$ ).

### 2.3 Procedure for the synthesis of 1,7-diphenylimidazo[1,2-*b*][1,2,4]triazolo[3,4-*f*][1,2,4,5]tetrazine (**5-cis**) and 1,7-diphenylimidazo[1,2-*b*][1,2,4]triazolo[4,3-*e*][1,2,4,5]tetrazine (**5-trans**).

The starting 3-(2-benzylidenehydrazinyl)-7-phenylimidazo[1,2-*b*][1,2,4,5]tetrazine **4**<sup>7</sup> (1.0 mmol) was dissolved in  $CHCl_3$  (15 ml) and the resulting solution was heated up to 50°C.  $Pb(OAc)_4$  (1.0 mmol) was added to the stirred reaction mixture in portions of 0.5 mmol with an interval of 15 min. Then the resulting mixture was heated for another 30 minutes until the initial compound completely disappeared (control by TLC) and after that cooled to room temperature. The reaction mixture was filtered, the filtrate was evaporated to dryness and the products **5-cis** ( $R_f = 0.8$ ) and **5-trans** ( $R_f = 0.6$ ) were separated by column chromatography using silica gel 60 (230-400 mesh) and  $C_6H_6 : MeCN$  (1:1) as eluent.

**5-cis**: Yellow solid, 44 mg (14%), m.p. 258-260 °C (decomp.);  $^1H$  NMR ( $DMSO-d_6$ , 500 MHz):  $\delta/ppm$  7.44-7.48 (m, 1H, Ar), 7.50-7.53 (m, 2H, Ar), 7.77-7.83 (m, 3H, Ar), 7.88 (d,  $^3J_{HH} = 7.3$  Hz, 2H, Ar), 8.07 (d,  $^3J_{HH} = 7.9$  Hz, 2H, Ar), 8.30 (s, 1H, C(8)H).  $^{13}C$  NMR ( $DMSO-d_6$ , 126 MHz):  $\delta/ppm$  109.9, 124.1, 126.7, 129.6, 129.9, 130.1, 130.7, 131.6, 132.2, 143.3, 143.8, 144.8, 150.4. Anal. Calcd for  $C_{17}H_{11}N_7$ : C, 65.17; H, 3.54; N, 31.29; Found C, 65.32; H, 3.68; N, 31.11. HRMS (ESI): Found  $m/z = 314.1151$  ( $[M+H]^+$ ).  $C_{17}H_{12}N_7^+$ . Calculated 314.1149 ( $[M+H]^+$ ).

**5-trans**: Dark-green solid, 28 mg (9%), m.p. 285 °C (decomp.);  $^1H$  NMR ( $DMSO-d_6$ , 500 MHz):  $\delta/ppm$  7.62-7.73 (m, 6H, Ar), 8.41 (br.s, 2H, Ar), 8.50 (s, 2H, Ar), 9.68 (s, 1H, C(8)H).  $^{13}C$  NMR ( $DMSO-d_6$ , 126 MHz):  $\delta/ppm$  114.0, 126.2, 126.7, 128.7, 128.8, 129.7, 130.1, 130.7, 131.5, 133.6, 143.4, 144.2, 147.9, 166.5. Anal. Calcd for  $C_{17}H_{11}N_7$ : C, 65.17; H, 3.54; N, 31.29; Found C, 65.04; H, 3.62; N, 31.17. HRMS (ESI): Found  $m/z = 314.1151$  ( $[M+H]^+$ ).  $C_{17}H_{12}N_7^+$ . Calculated 314.1149 ( $[M+H]^+$ ).

## 2.4 NMR spectra of synthesized compounds

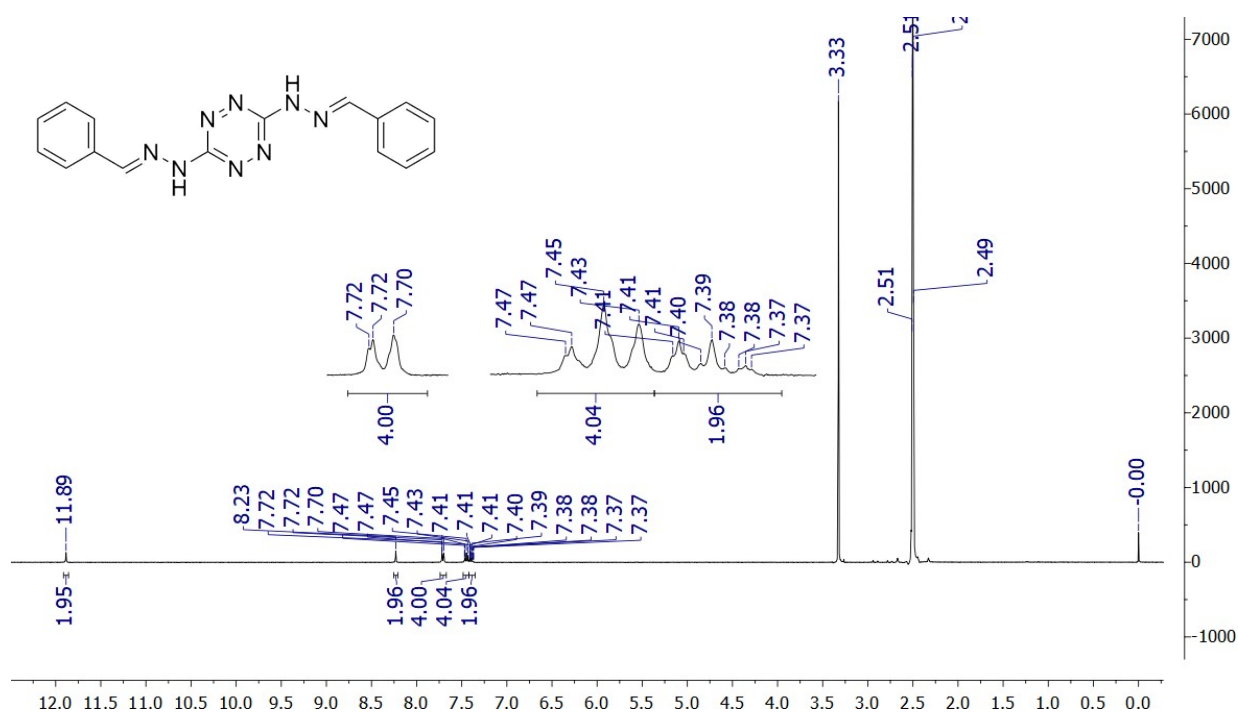

**Figure S1.**  $^1\text{H}$  NMR spectrum of the 3,6-bis(2-benzylidenehydrazinyl)-1,2,4,5-tetrazine (**2a**).

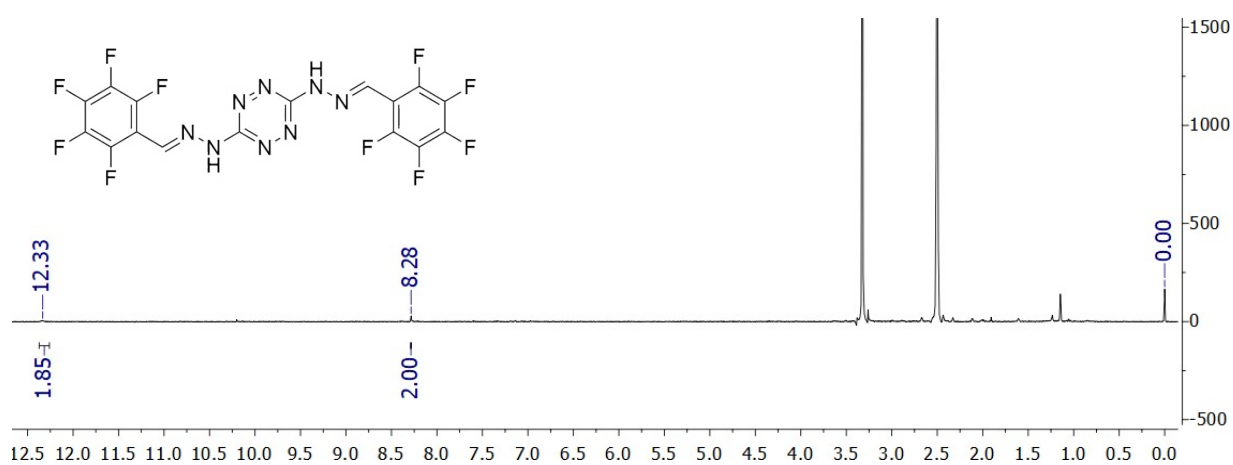

**Figure S2.**  $^1\text{H}$  NMR spectrum of the 3,6-bis(2-(perfluorobenzylidene)hydrazinyl)-1,2,4,5-tetrazine (**2b**).

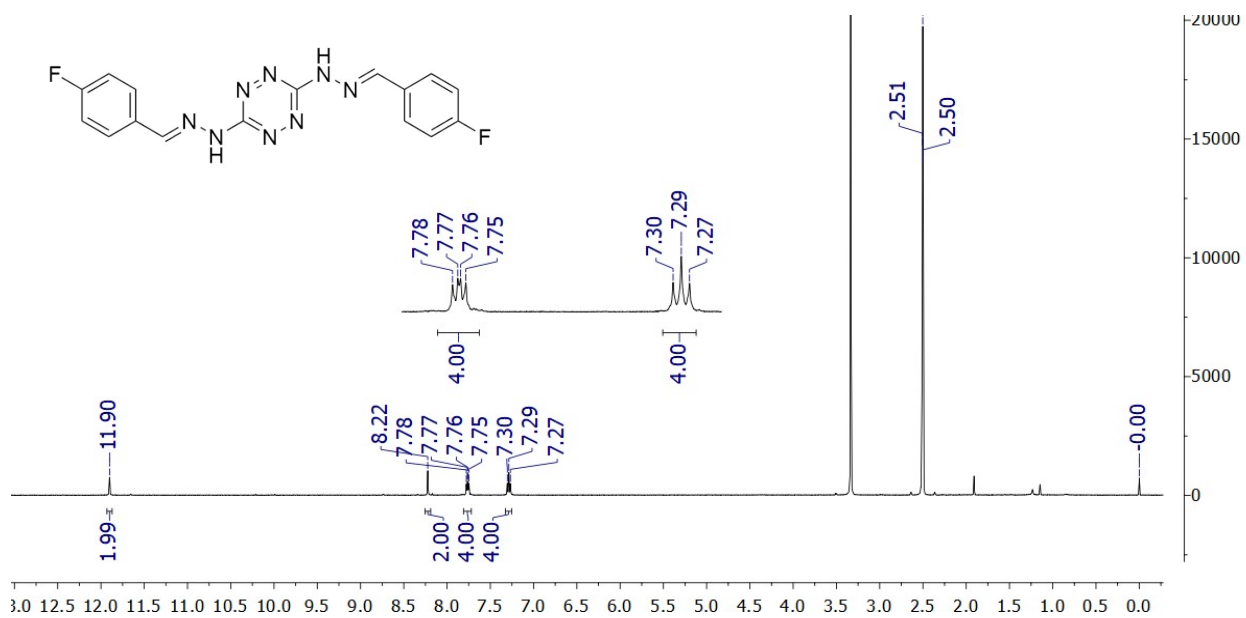

**Figure S3.**  $^1\text{H}$  NMR spectrum of the 3,6-bis(2-(4-fluorobenzylidene)hydrazinyl)-1,2,4,5-tetrazine (**2c**).

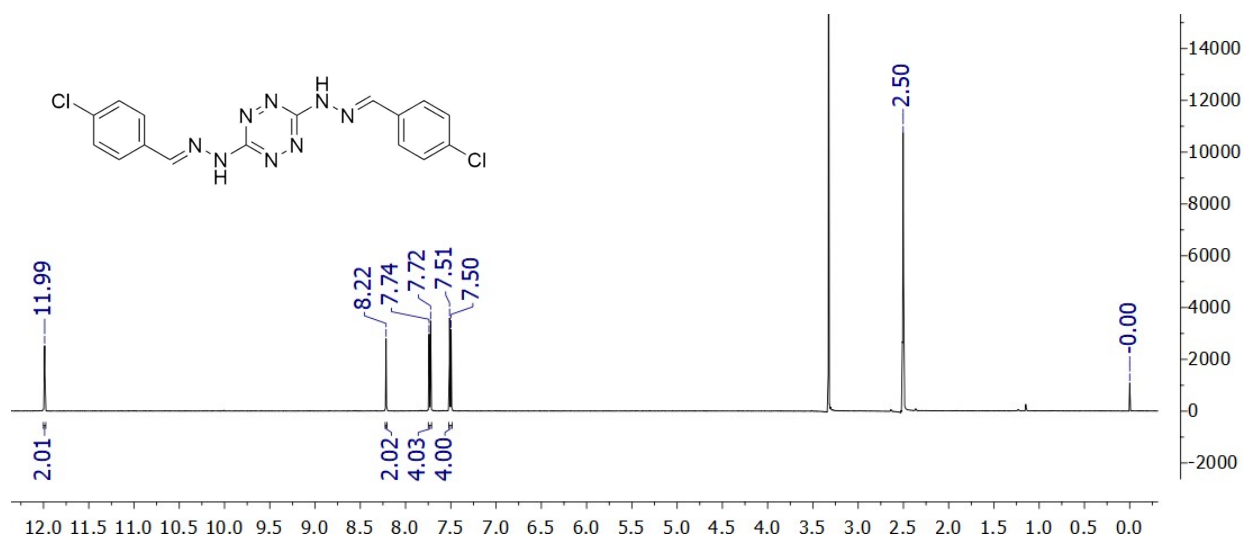

**Figure S4.**  $^1\text{H}$  NMR spectrum of the 3,6-bis(2-(4-chlorobenzylidene)hydrazinyl)-1,2,4,5-tetrazine (**2d**).

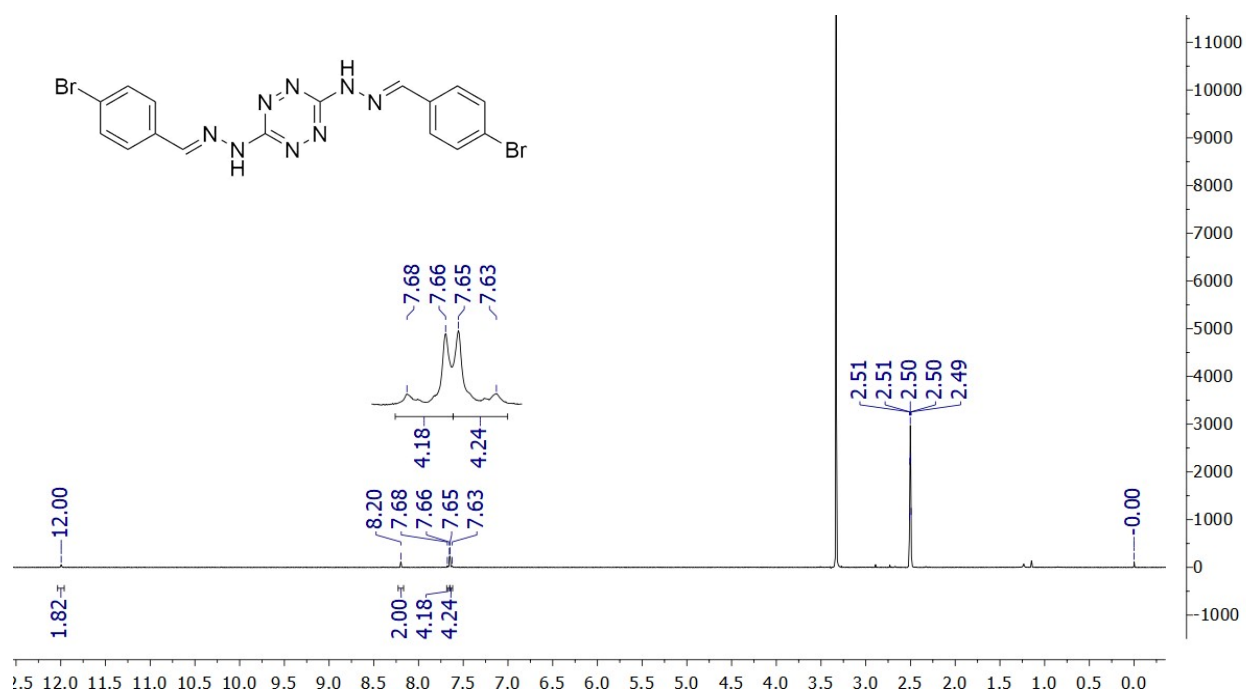

**Figure S5.**  $^1\text{H}$  NMR spectrum of the 3,6-bis(2-(4-bromobenzylidene)hydrazinyl)-1,2,4,5-tetrazine (**2e**).

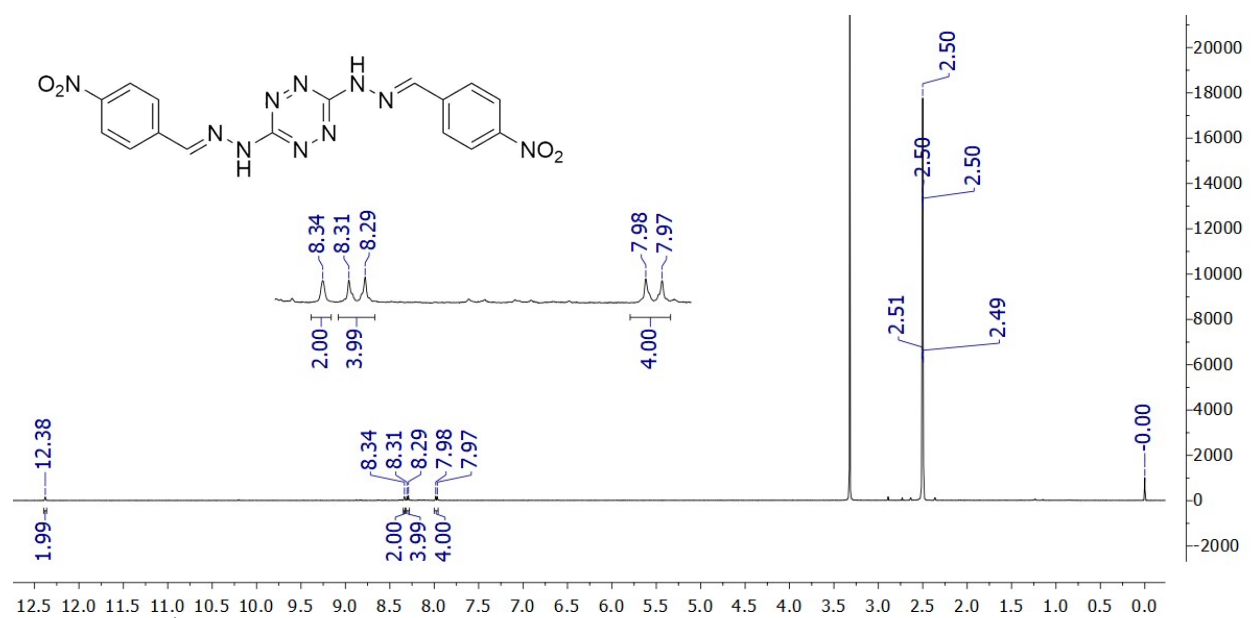

**Figure S6.**  $^1\text{H}$  NMR spectrum of the 3,6-bis(2-(4-nitrobenzylidene)hydrazinyl)-1,2,4,5-tetrazine (**2f**).

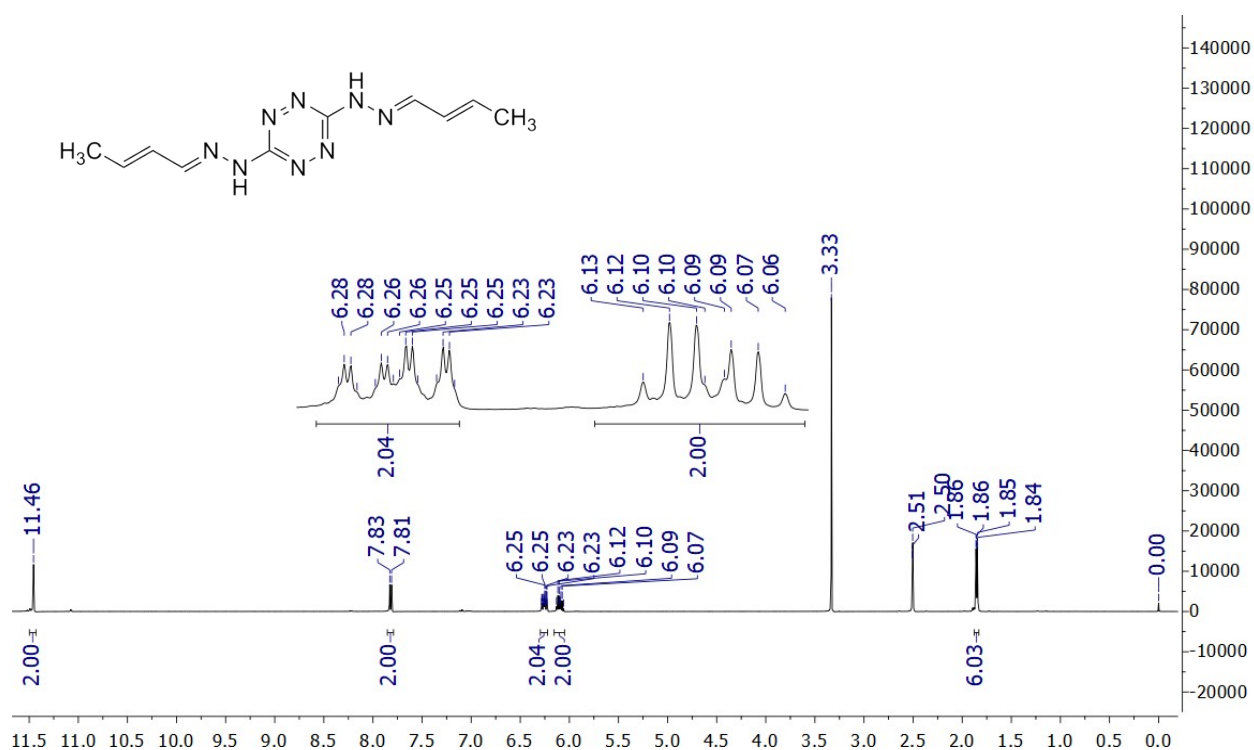

**Figure S7.** <sup>1</sup>H NMR spectrum of the 3,6-bis(2-(but-2-en-1-ylidene)hydrazinyl)-1,2,4,5-tetrazine (2g).

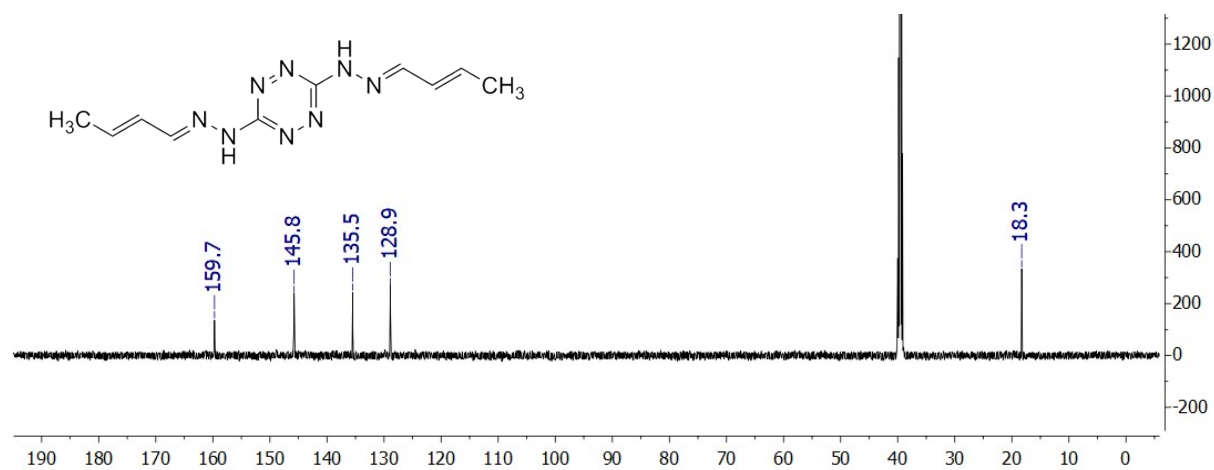

**Figure S8.** <sup>13</sup>C NMR spectrum of the 3,6-bis(2-(but-2-en-1-ylidene)hydrazinyl)-1,2,4,5-tetrazine (2g).

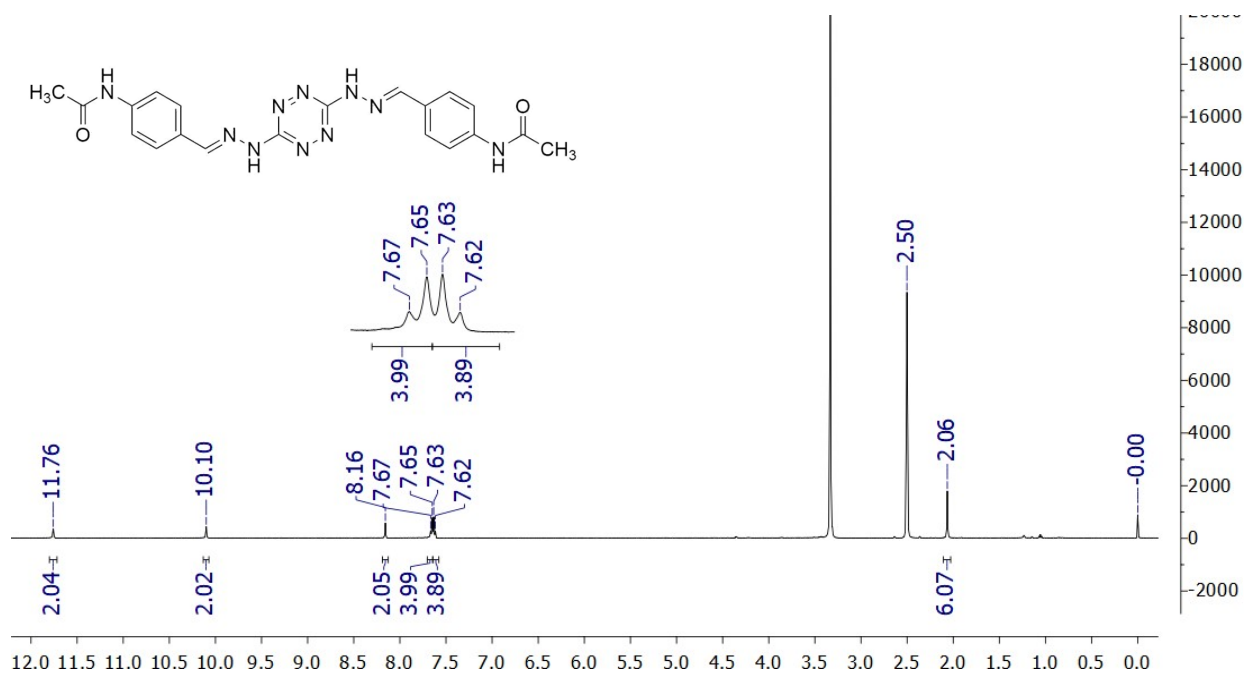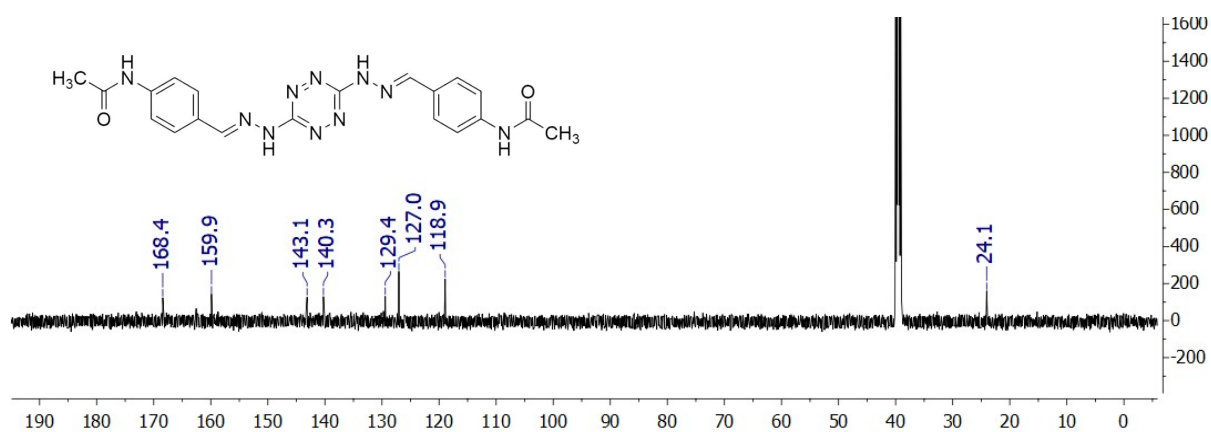



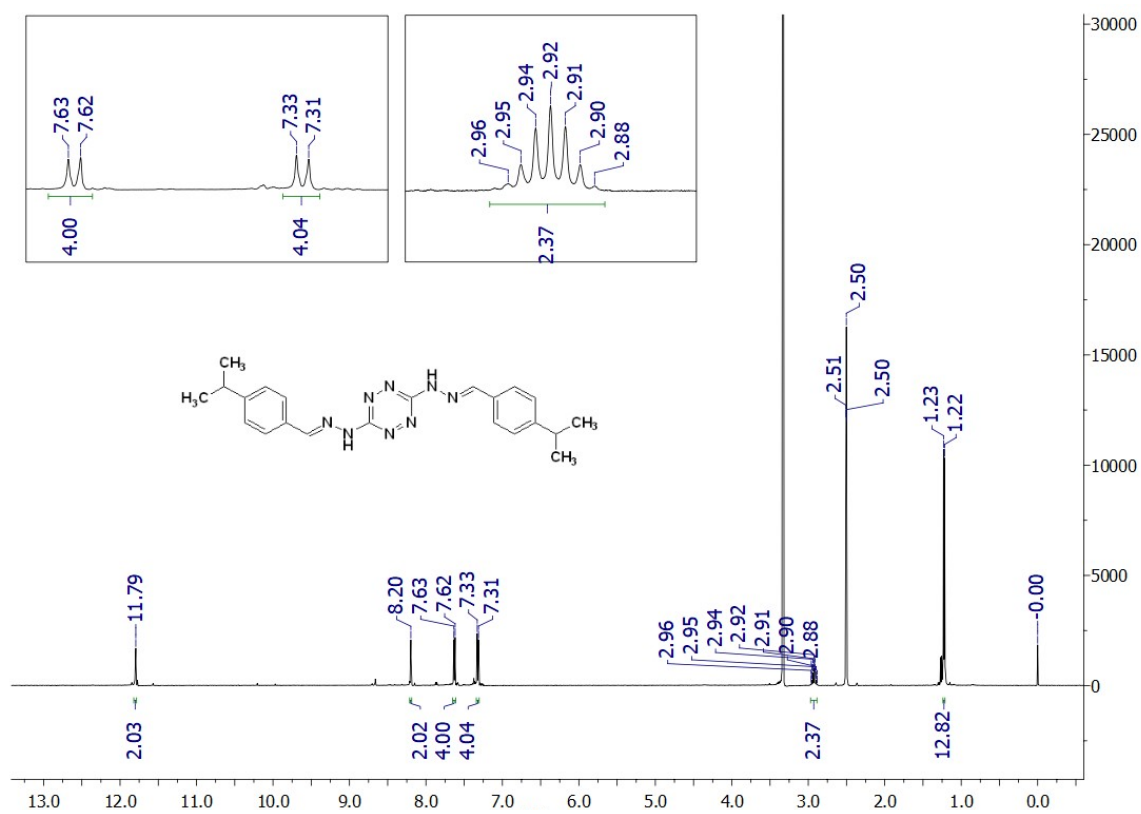

**Figure S11.** <sup>1</sup>H NMR spectrum of the 3,6-bis(2-(4-isopropylbenzylidene)hydrazinyl)-1,2,4,5-tetrazine (**2i**).

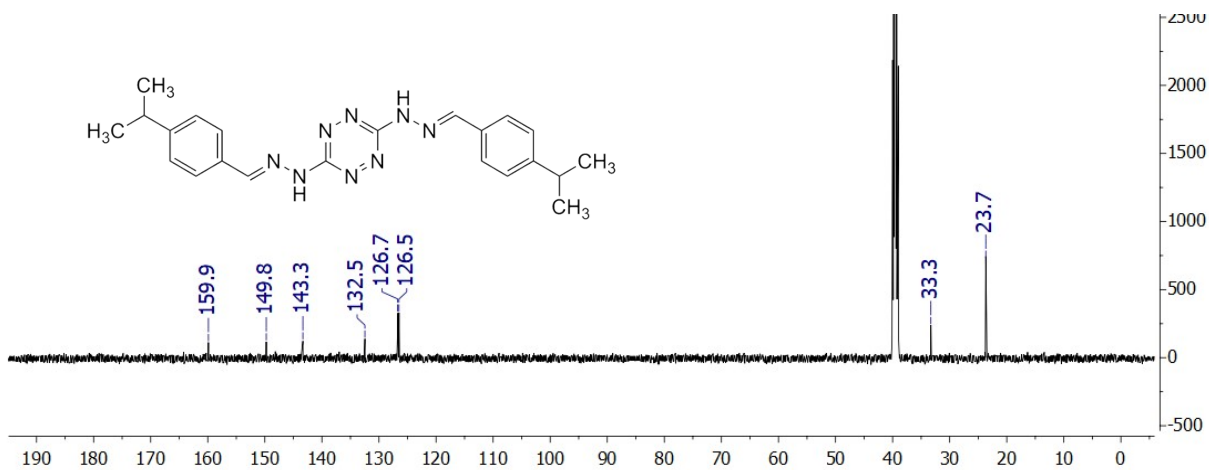

**Figure S12.** <sup>13</sup>C NMR spectrum of the 3,6-bis(2-(4-isopropylbenzylidene)hydrazinyl)-1,2,4,5-tetrazine (**2i**).

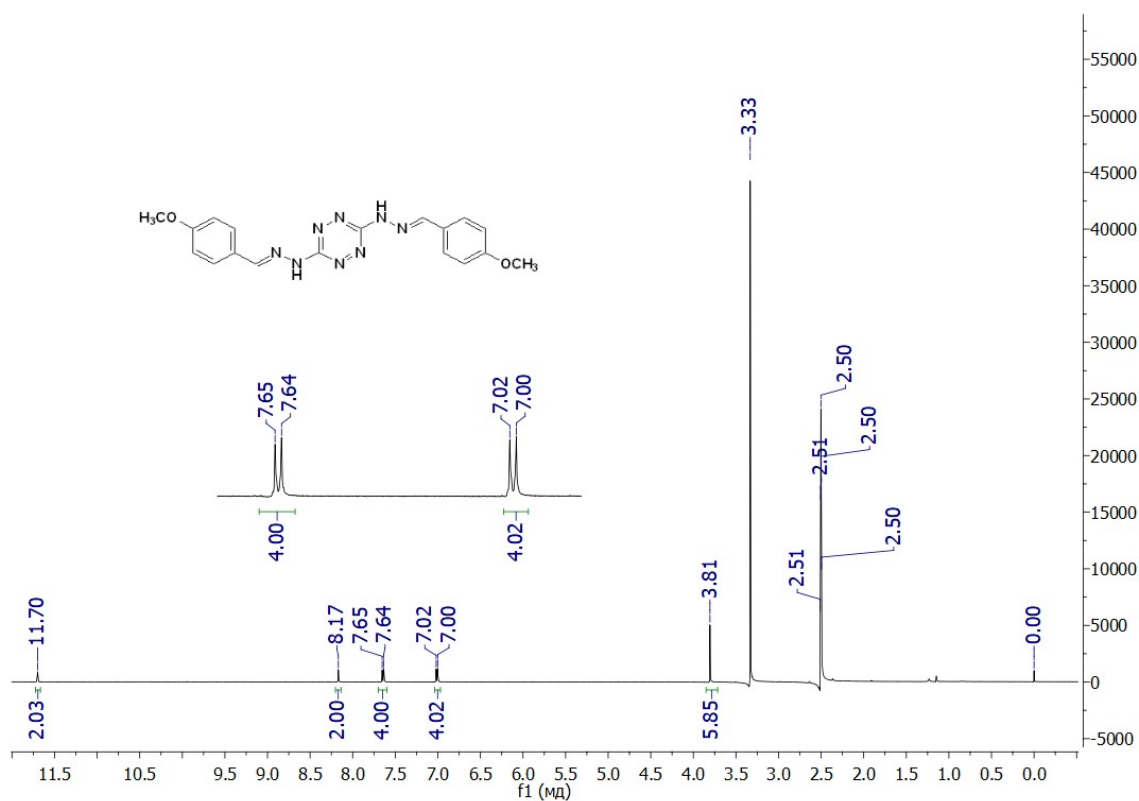

**Figure S13.** <sup>1</sup>H NMR spectrum of the 3,6-bis(2-(4-methoxybenzylidene)hydrazinyl)-1,2,4,5-tetrazine (**2j**).

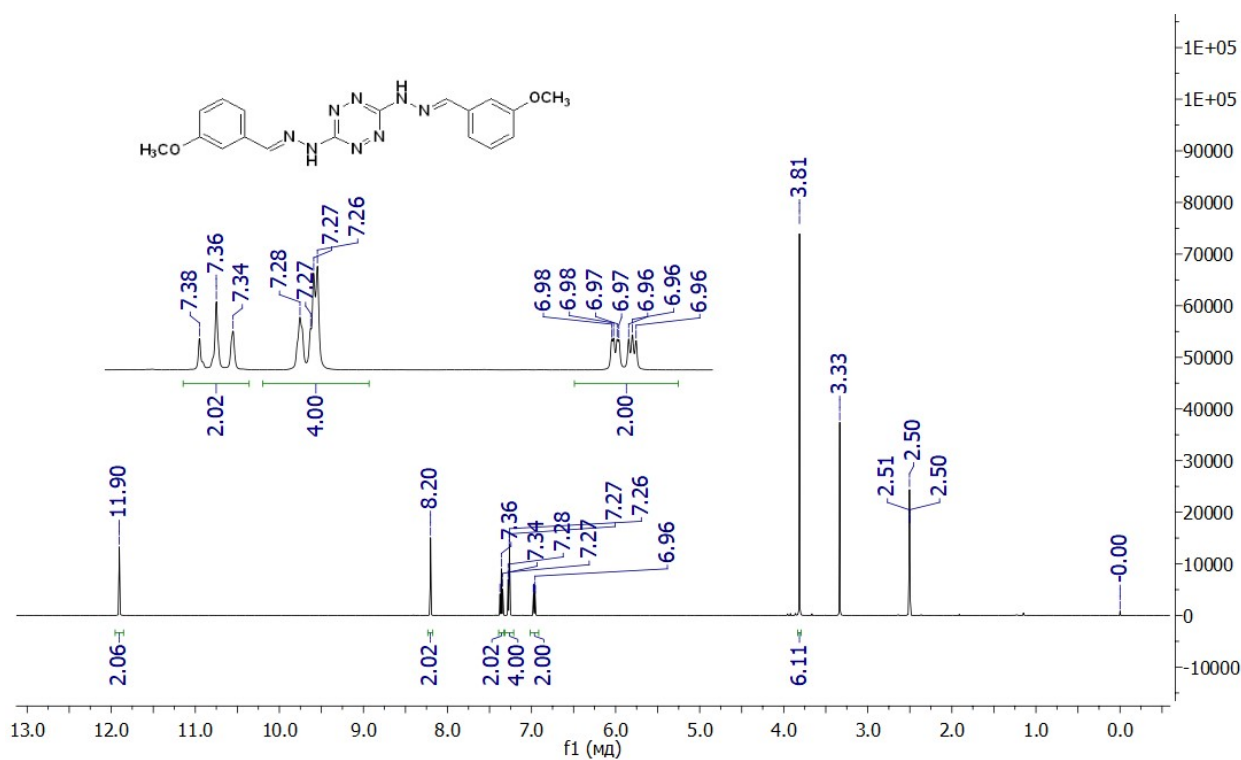

**Figure S14.** <sup>1</sup>H NMR spectrum of the 3,6-bis(2-(3-methoxybenzylidene)hydrazinyl)-1,2,4,5-tetrazine (**2k**).

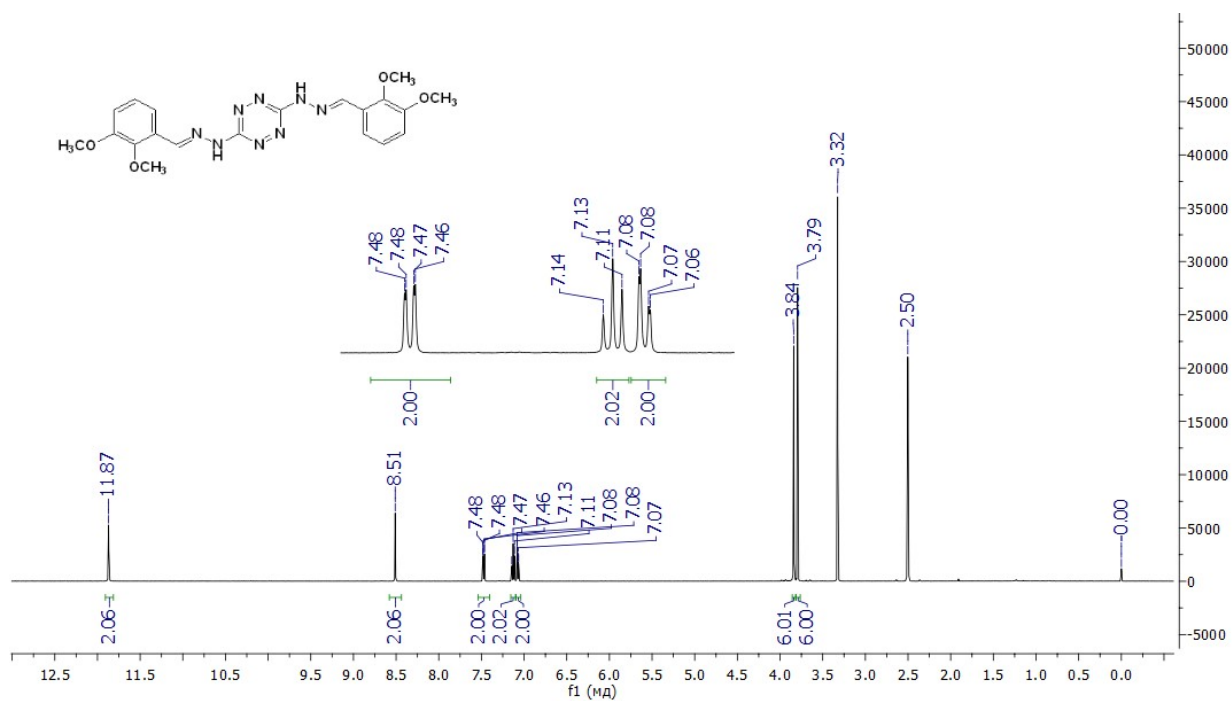

**Figure S15.** <sup>1</sup>H NMR spectrum of the 3,6-bis(2-(2,3-dimethoxybenzylidene)hydrazinyl)-1,2,4,5-tetrazine (**21**)

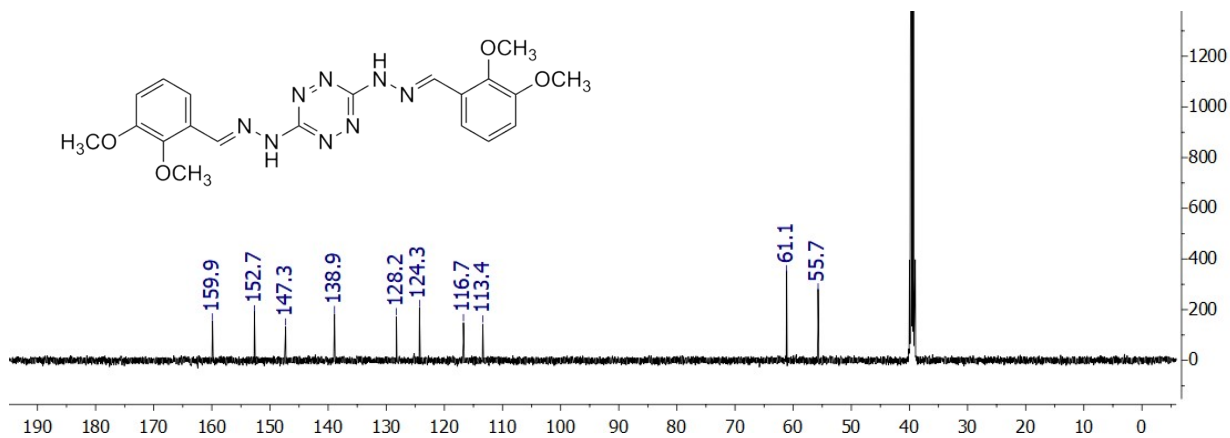

**Figure S16.** <sup>13</sup>C NMR spectrum of the 3,6-bis(2-(2,3-dimethoxybenzylidene)hydrazinyl)-1,2,4,5-tetrazine (**21**)

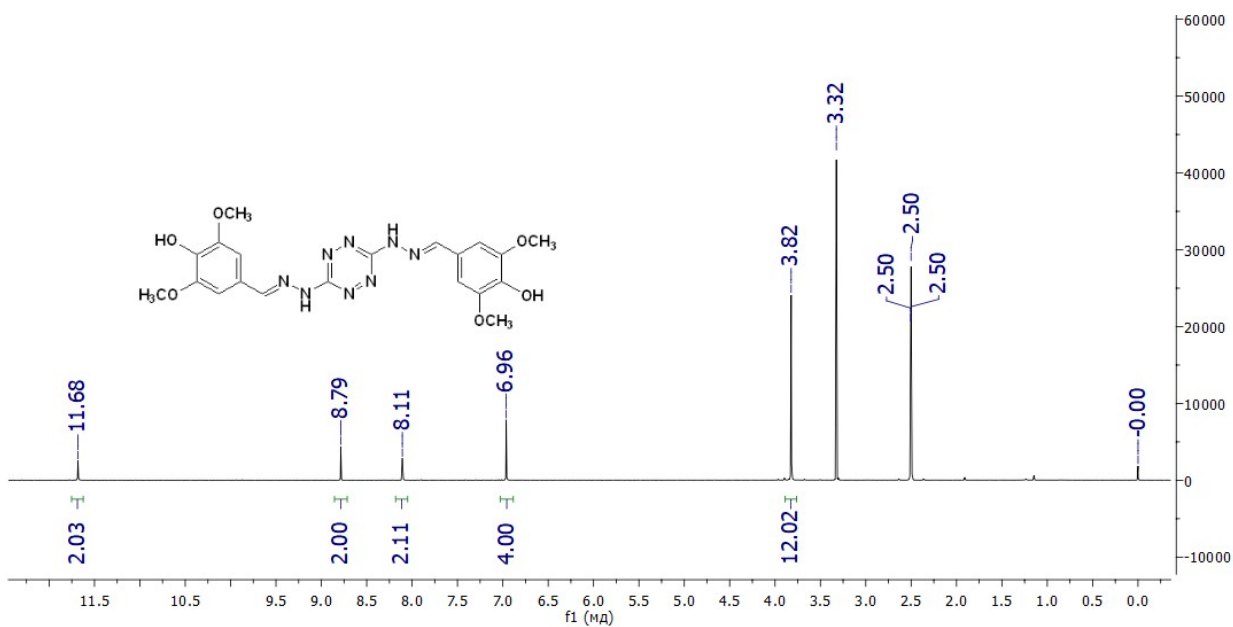

**Figure S17.**  $^1\text{H}$  NMR spectrum of the 3,6-bis(2-(4-hydroxy-3,5-dimethoxybenzylidene)hydrazinyl)-1,2,4,5-tetrazine (**2m**)

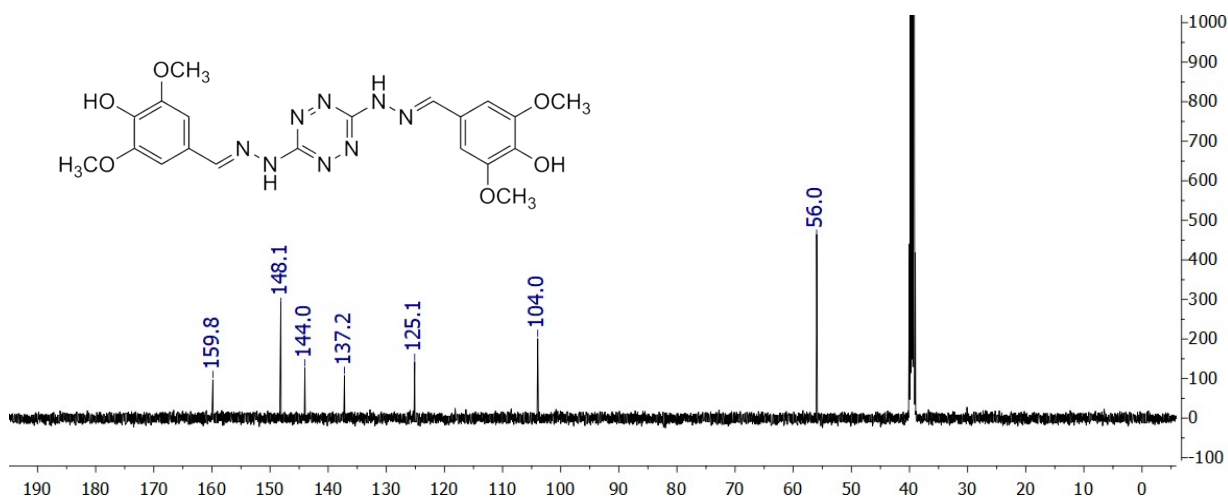

**Figure S18.**  $^{13}\text{C}$  NMR spectrum of the 3,6-bis(2-(4-hydroxy-3,5-dimethoxybenzylidene)hydrazinyl)-1,2,4,5-tetrazine (**2m**)

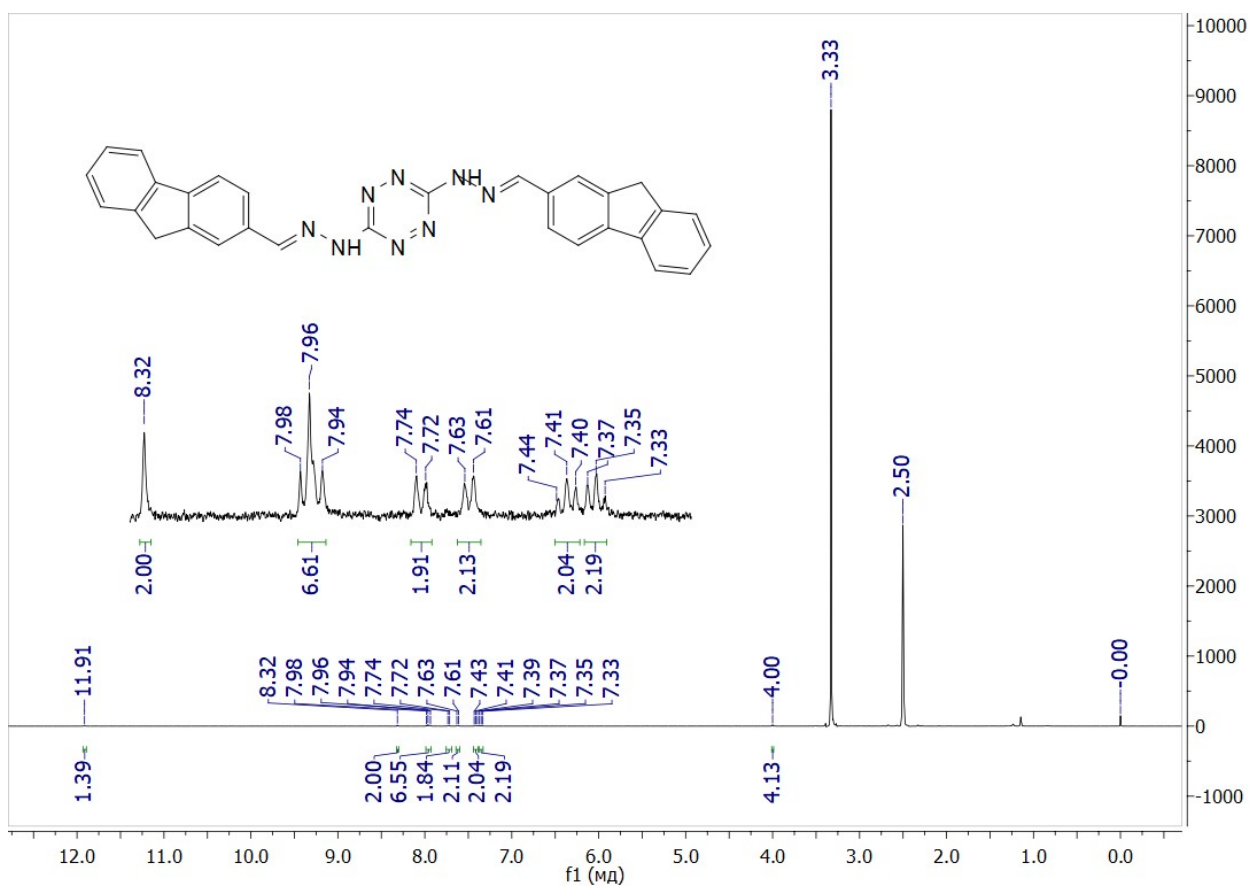

**Figure S19.**  $^1\text{H}$  NMR spectrum of the 3,6-bis(2-(9H-fluoren-2-ylmethylidene)hydrazinyl)-1,2,4,5-tetrazine (**2n**)

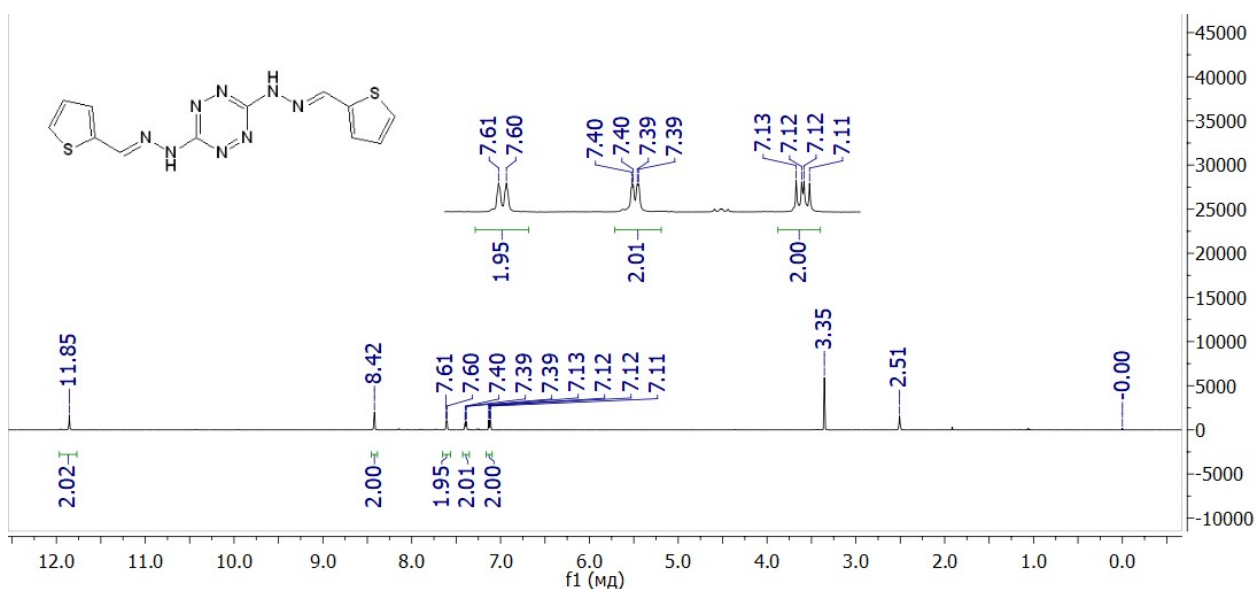

**Figure S20.**  $^1\text{H}$  NMR spectrum of the 3,6-bis(2-(thiophen-2-ylmethylidene)hydrazinyl)-1,2,4,5-tetrazine (**2o**)

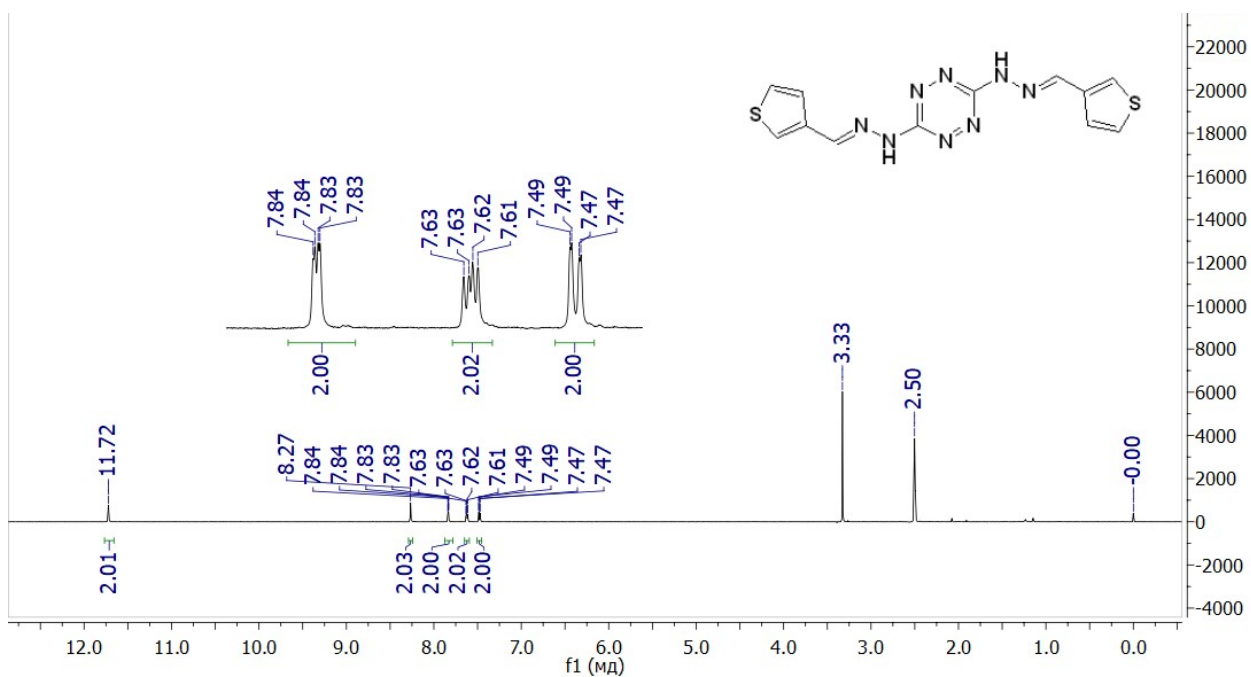

**Figure S21.**  $^1\text{H}$  NMR spectrum of the 3,6-bis(2-(thiophen-3-ylmethylidene)hydrazinyl)-1,2,4,5-tetrazine (**2p**)

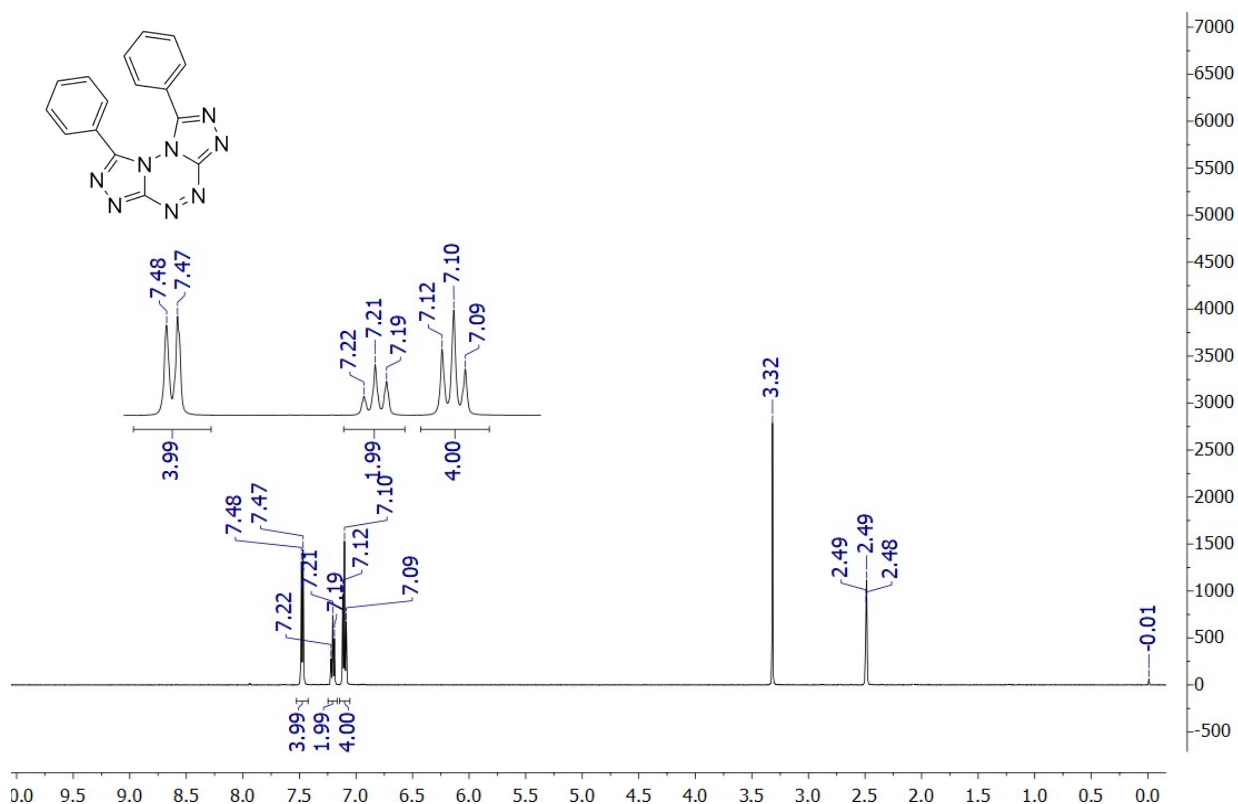

**Figure S22.**  $^1\text{H}$  NMR spectrum of the 1,8-di(phenyl)bis[1,2,4]triazolo[4,3-*b*:3',4'-*f*][1,2,4,5]tetrazine (**3a**).

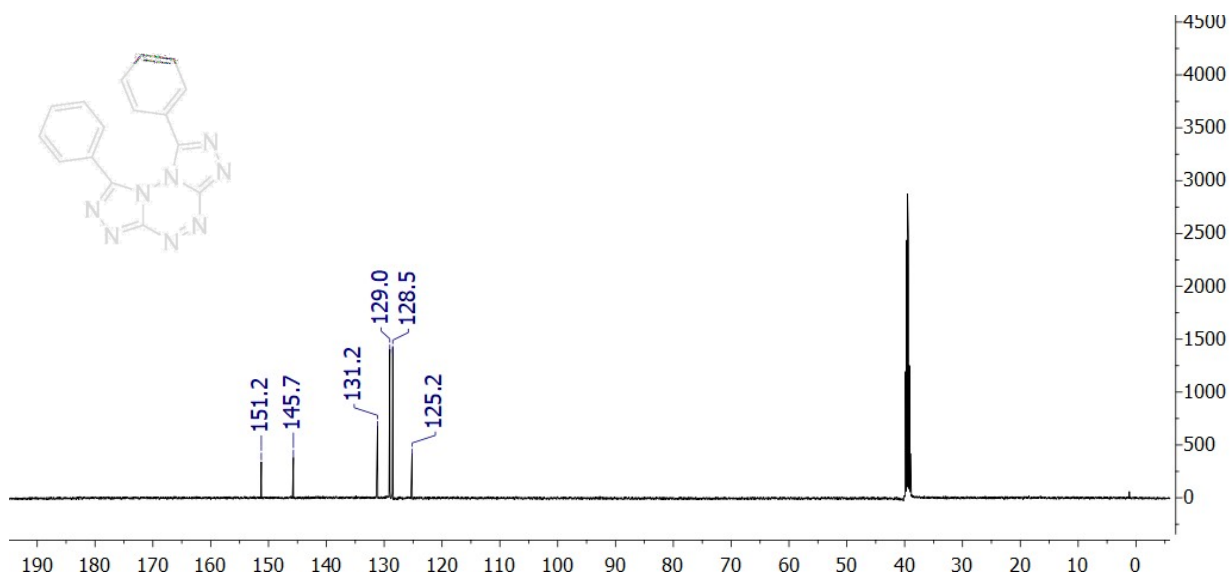

**Figure S23.**  $^{13}\text{C}$  NMR spectrum of the 1,8-di(phenyl)bis[1,2,4]triazolo[4,3-*b*:3',4'-*f*][1,2,4,5]tetrazine (**3a**).

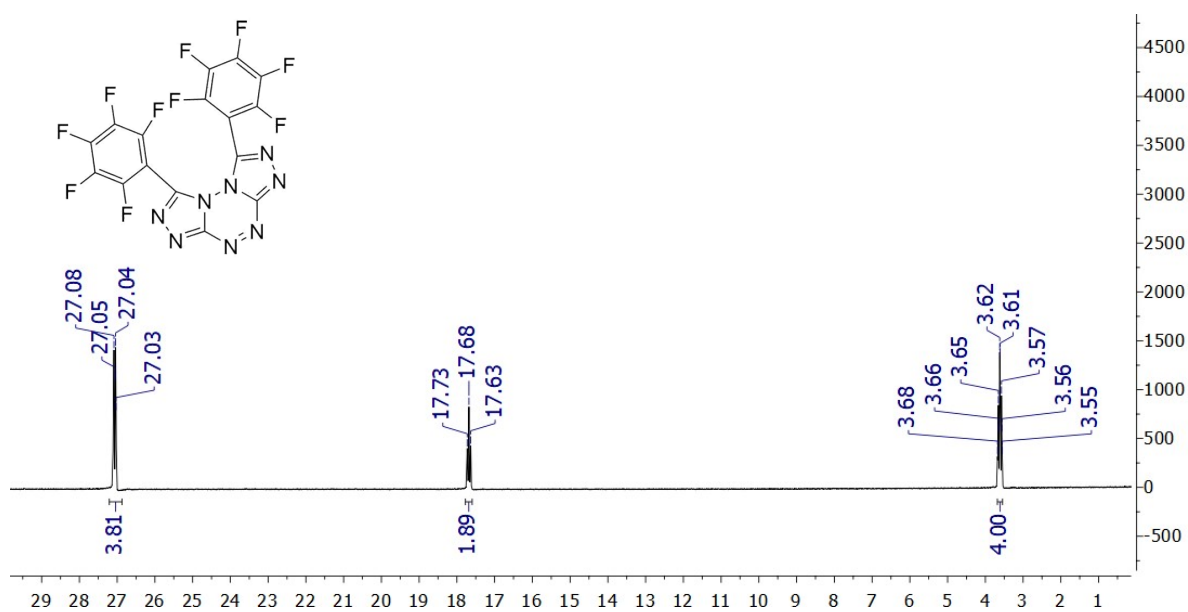

**Figure S24.**  $^{19}\text{F}$  NMR spectrum of the 1,8-di(perfluorophenyl)bis[1,2,4]triazolo[4,3-*b*:3',4'-*f*][1,2,4,5]tetrazine (**3b**).



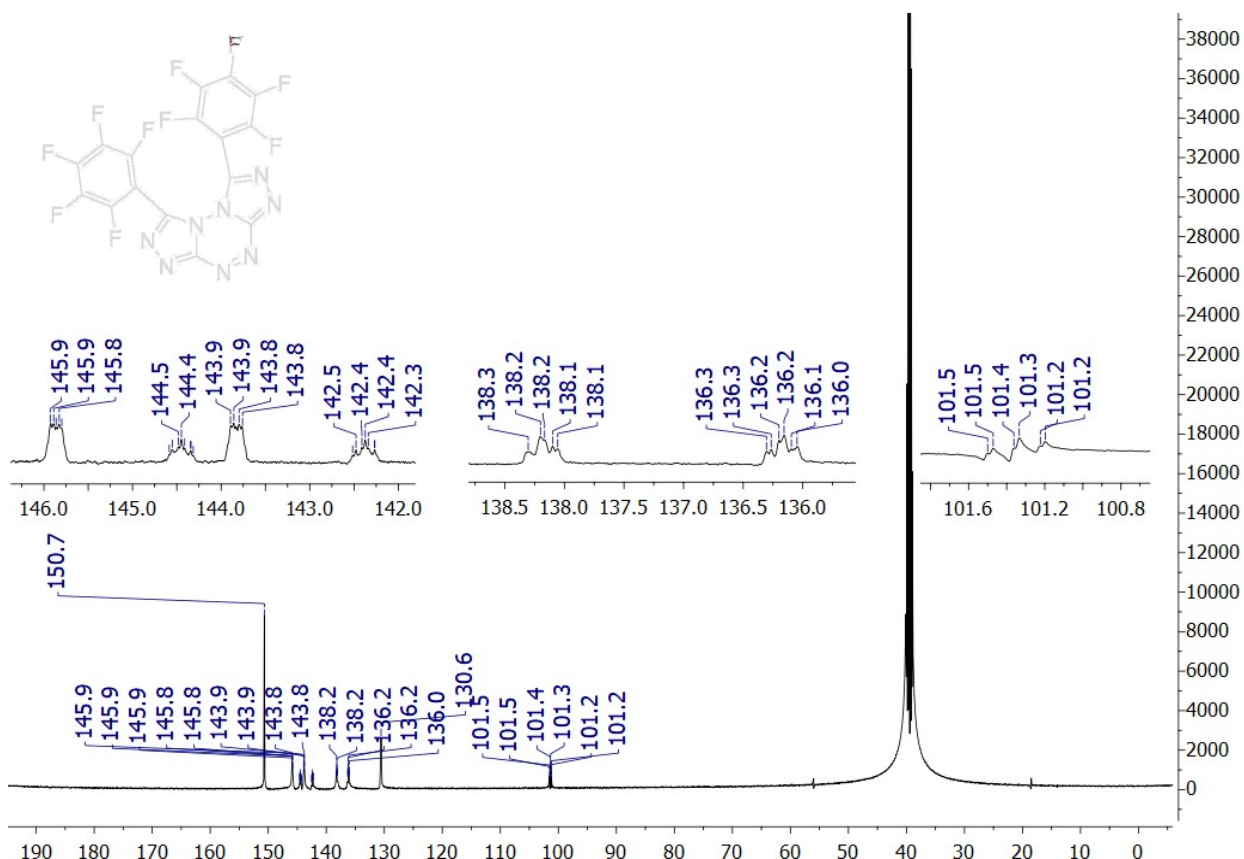

**Figure S25.**  $^{13}\text{C}$  NMR spectrum of the 1,8-di(perfluorophenyl)bis[1,2,4]triazolo[4,3-b:3',4'-f][1,2,4,5]tetrazine (**3b**).

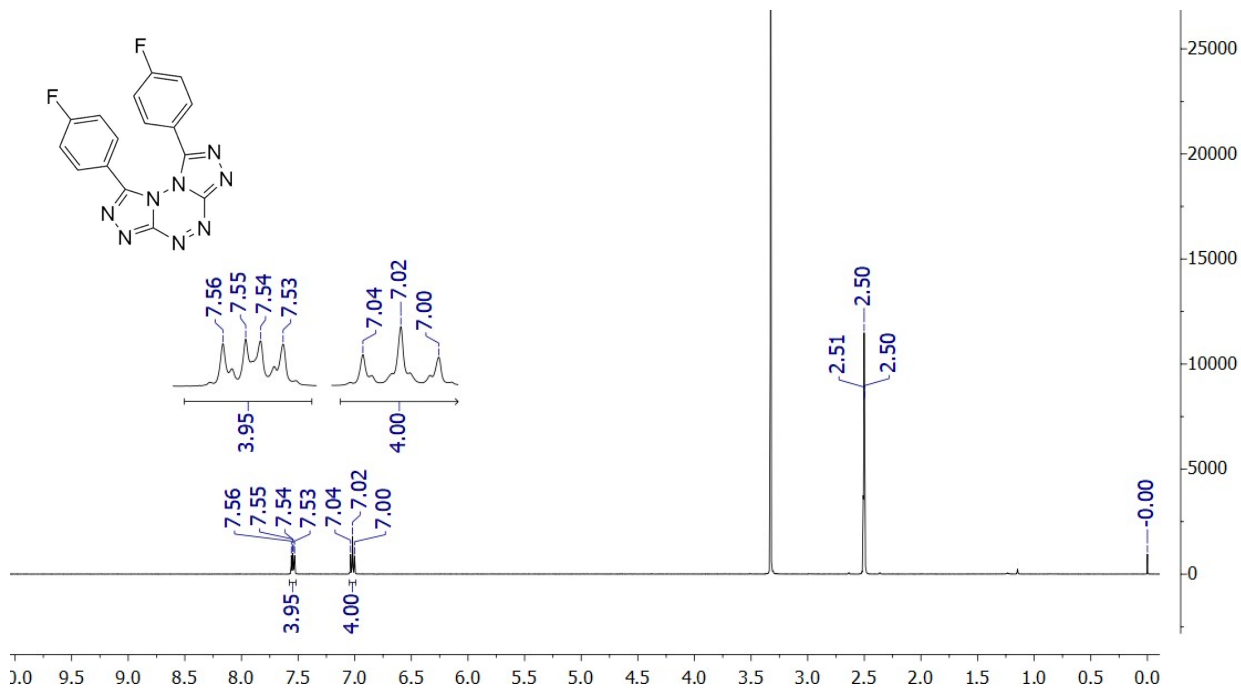

**Figure S26.**  $^1\text{H}$  NMR spectrum of the 1,8-di(4-fluorophenyl)bis[1,2,4]triazolo[4,3-b:3',4'-f][1,2,4,5]tetrazine (**3c**).



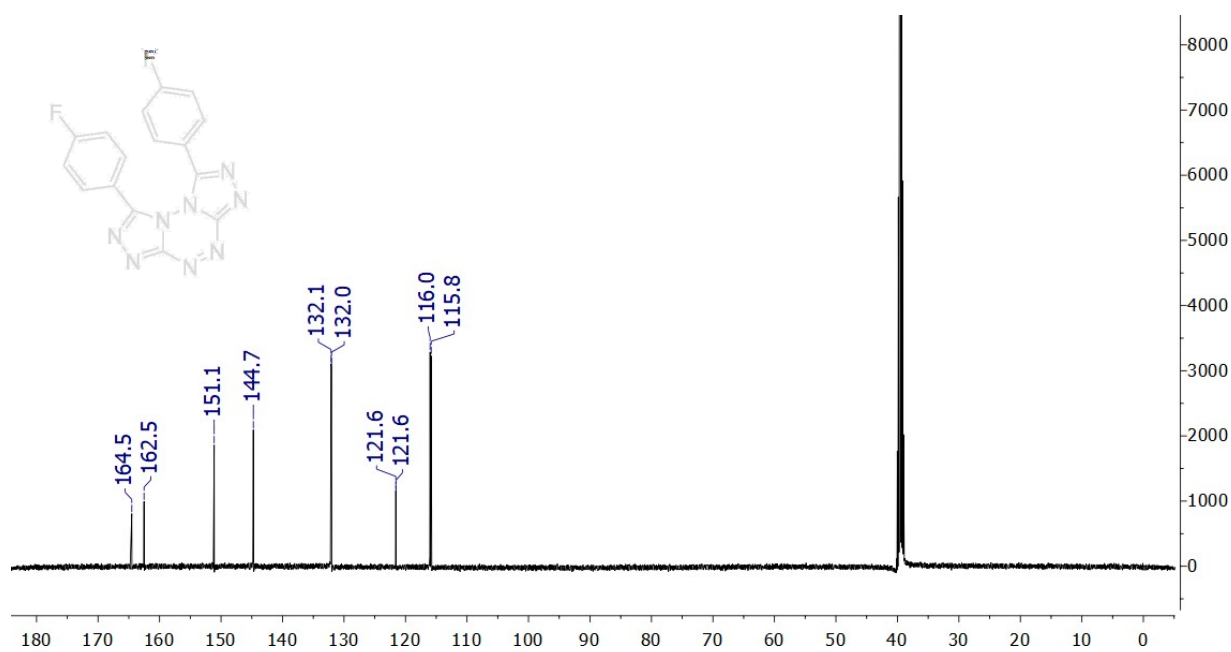

**Figure S27.**  $^{13}\text{C}$  NMR spectrum of the 1,8-di(4-fluorophenyl)bis[1,2,4]triazolo[4,3-*b*:3',4'-*f*][1,2,4,5]tetrazine (**3c**).

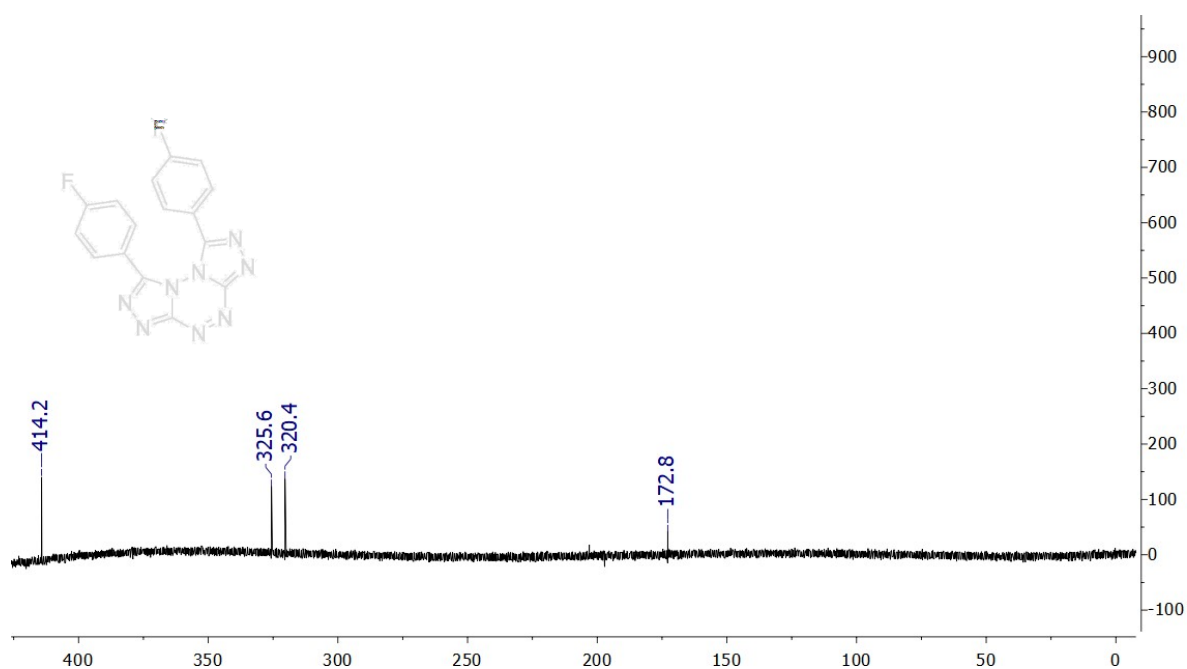

**Figure S28.**  $^{15}\text{N}$  NMR spectrum of the 1,8-di(4-fluorophenyl)bis[1,2,4]triazolo[4,3-*b*:3',4'-*f*][1,2,4,5]tetrazine (**3c**).

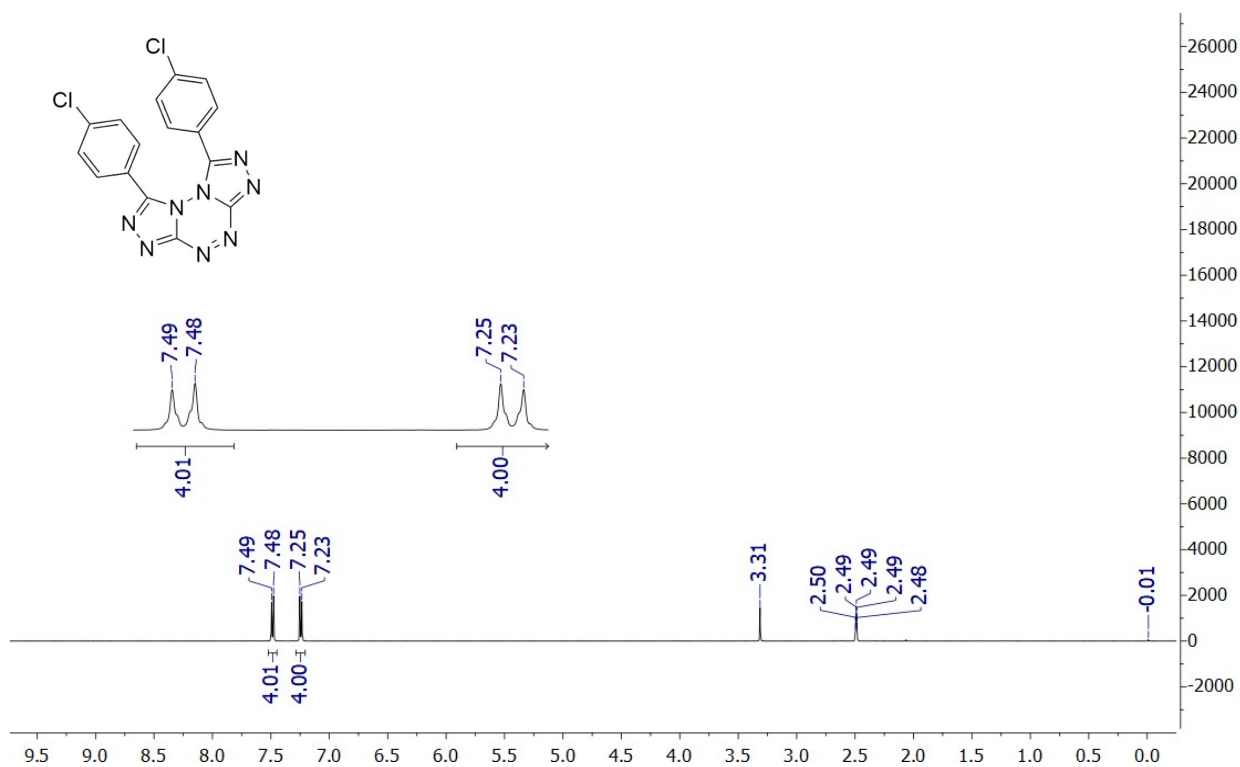

**Figure S29.** <sup>1</sup>H NMR spectrum of the 1,8-di(4-chlorophenyl)bis[1,2,4]triazolo[4,3-*b*:3',4'-*f*][1,2,4,5]tetrazine (**3d**).

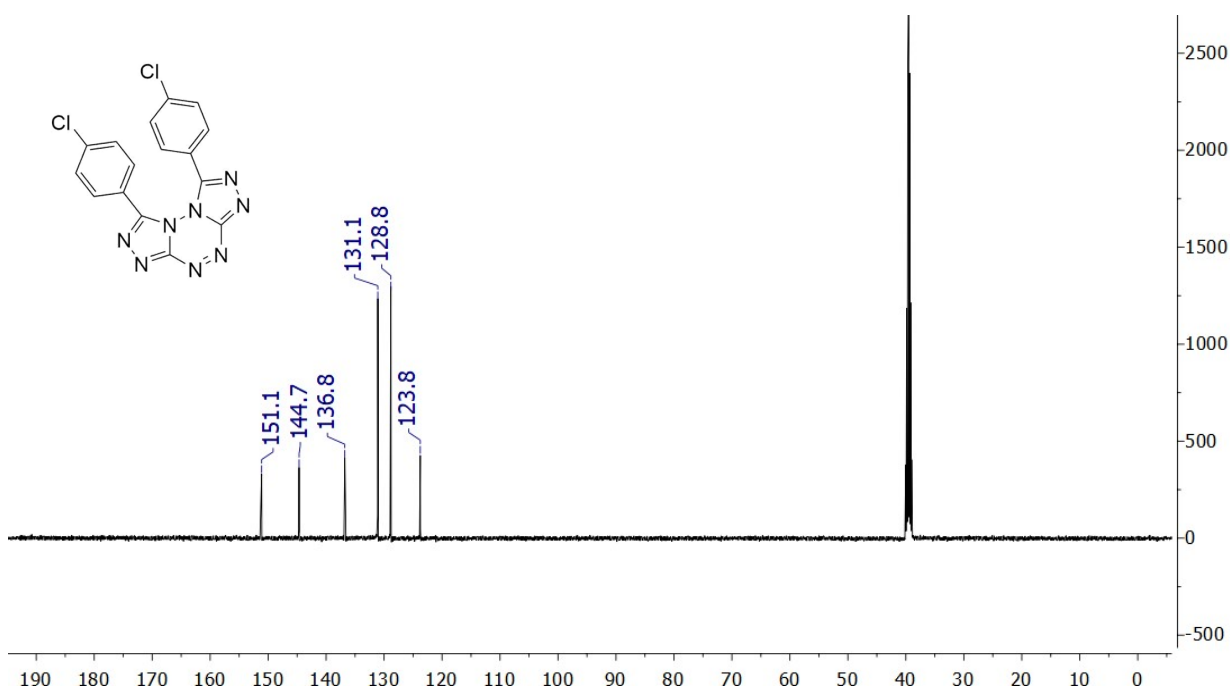

**Figure S30.** <sup>13</sup>C NMR spectrum of the 1,8-di(4-chlorophenyl)bis[1,2,4]triazolo[4,3-*b*:3',4'-*f*][1,2,4,5]tetrazine (**3d**).

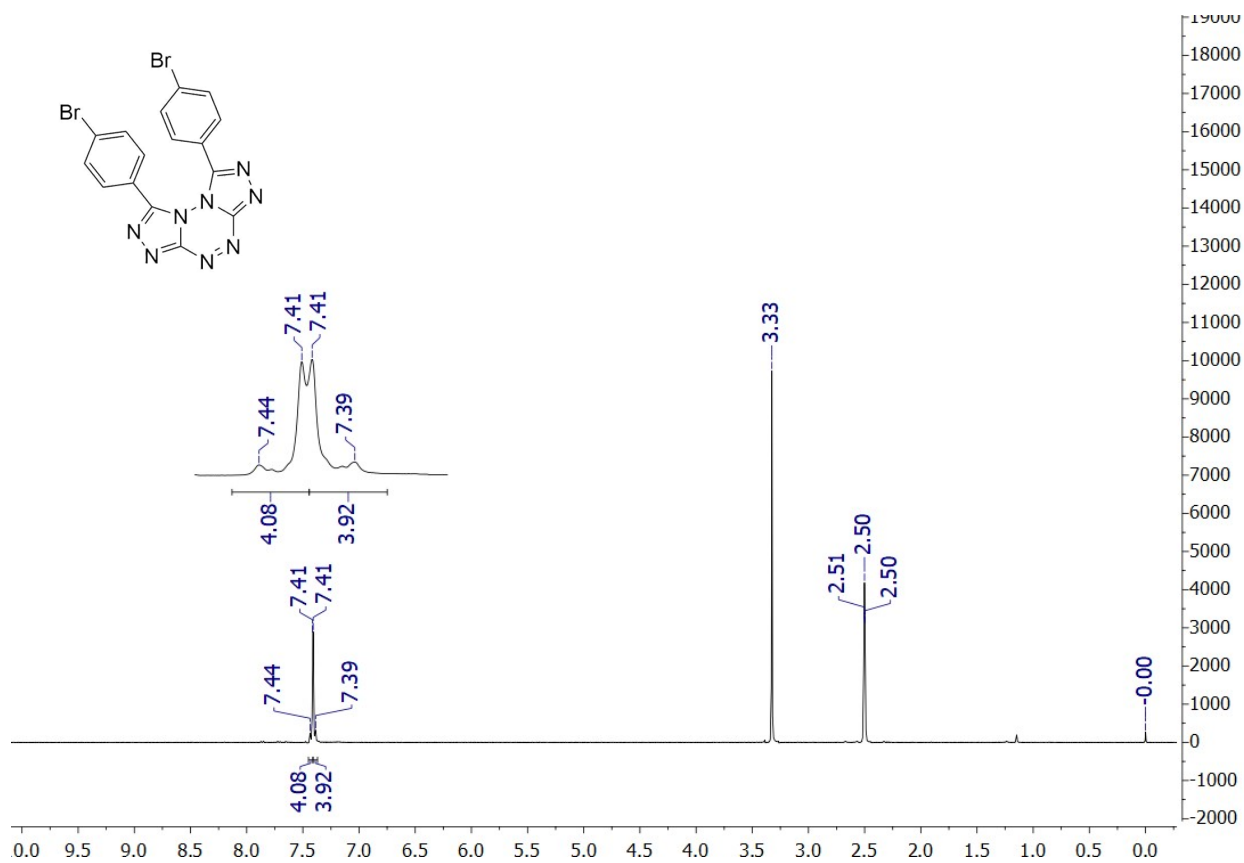

**Figure S31.** <sup>1</sup>H NMR spectrum of the 1,8-di(4-bromophenyl)bis[1,2,4]triazolo[4,3-*b*:3',4'-*f*][1,2,4,5]tetrazine (**3e**).

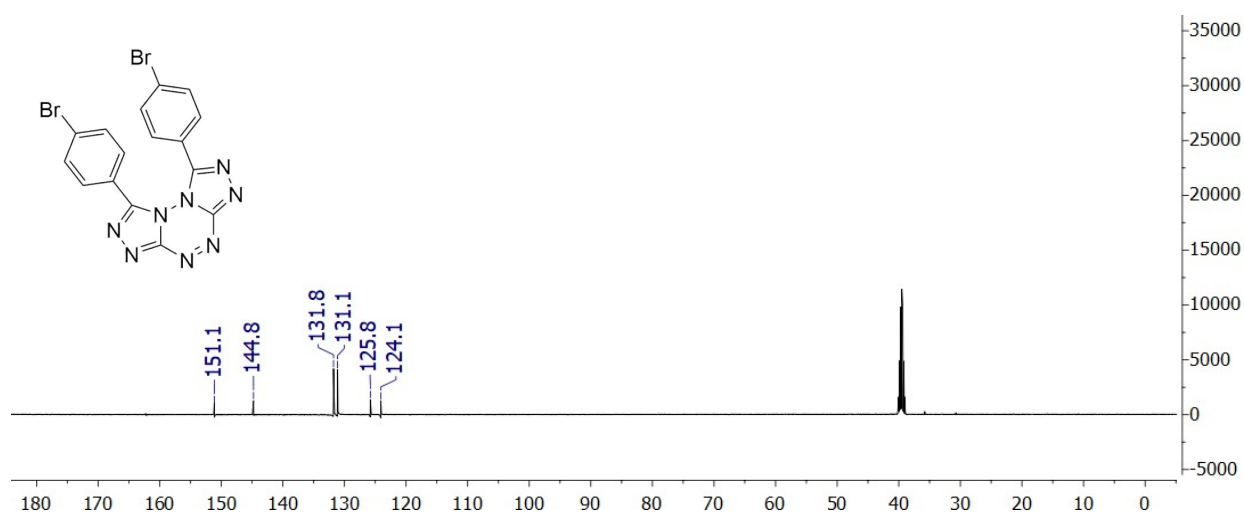

**Figure S32.** <sup>13</sup>C NMR spectrum of the 1,8-di(4-bromophenyl)bis[1,2,4]triazolo[4,3-*b*:3',4'-*f*][1,2,4,5]tetrazine (**3e**).

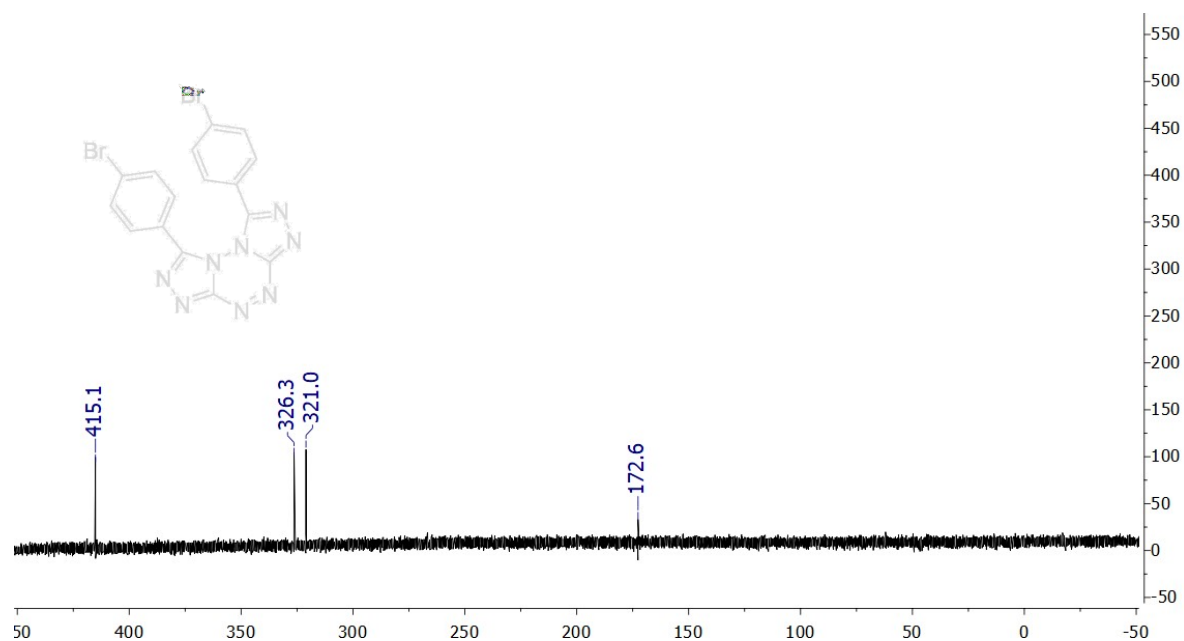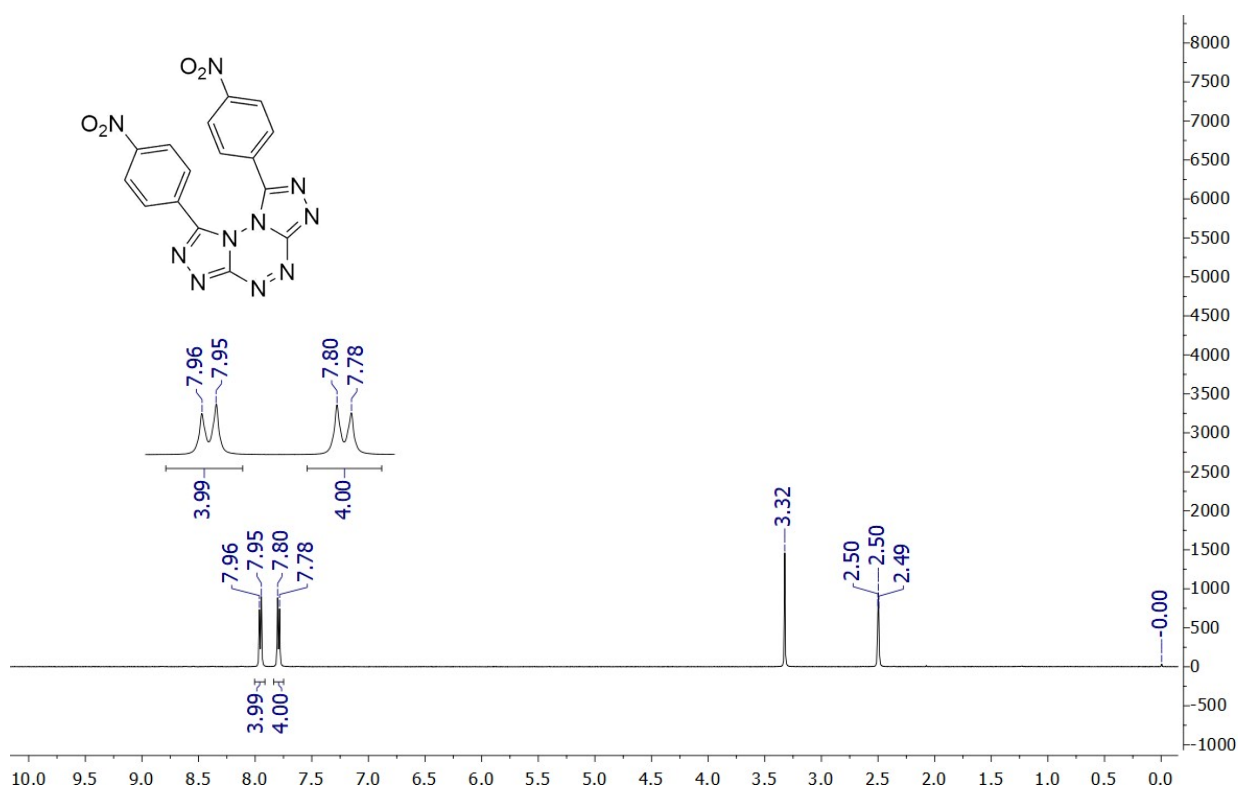

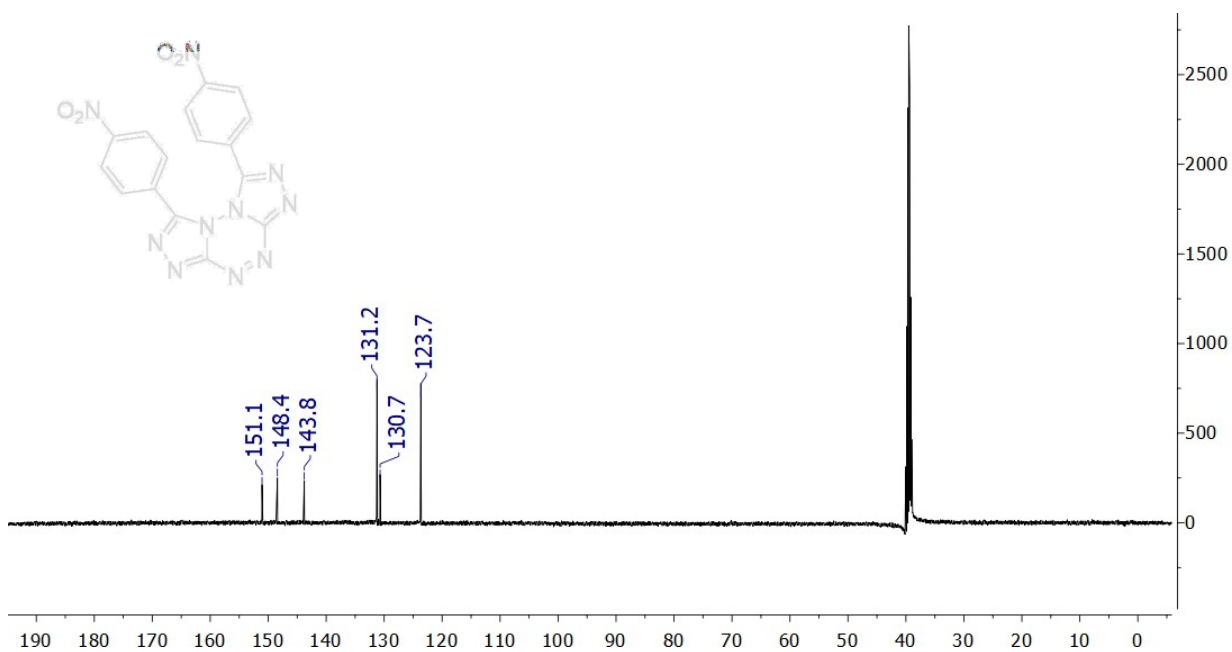

**Figure S35.** <sup>13</sup>C NMR spectrum of the 1,8-di(4-nitrophenyl)bis[1,2,4]triazolo[4,3-*b*:3',4'-*f*][1,2,4,5]tetrazine (**3f**).

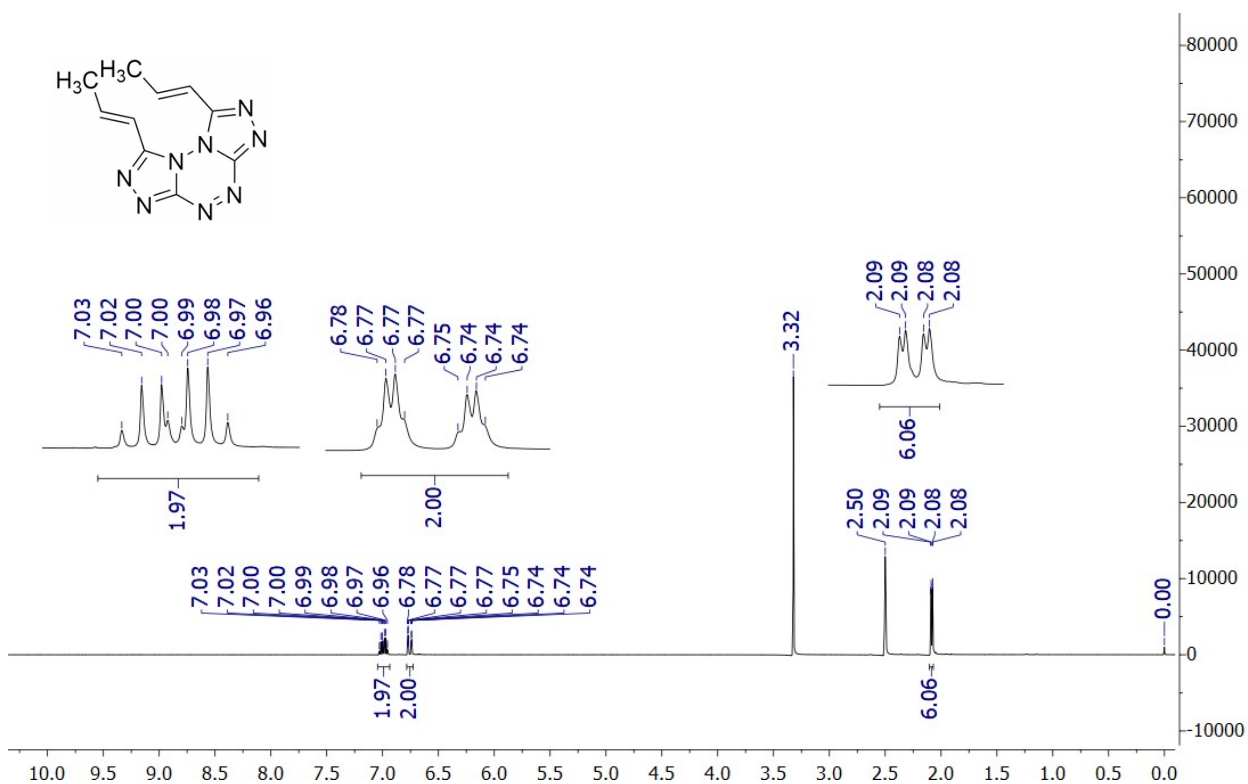

**Figure S36.** <sup>1</sup>H NMR spectrum of the 1,8-di(propen-1-yl)bis[1,2,4]triazolo[4,3-*b*:3',4'-*f*][1,2,4,5]tetrazine (**3g**).

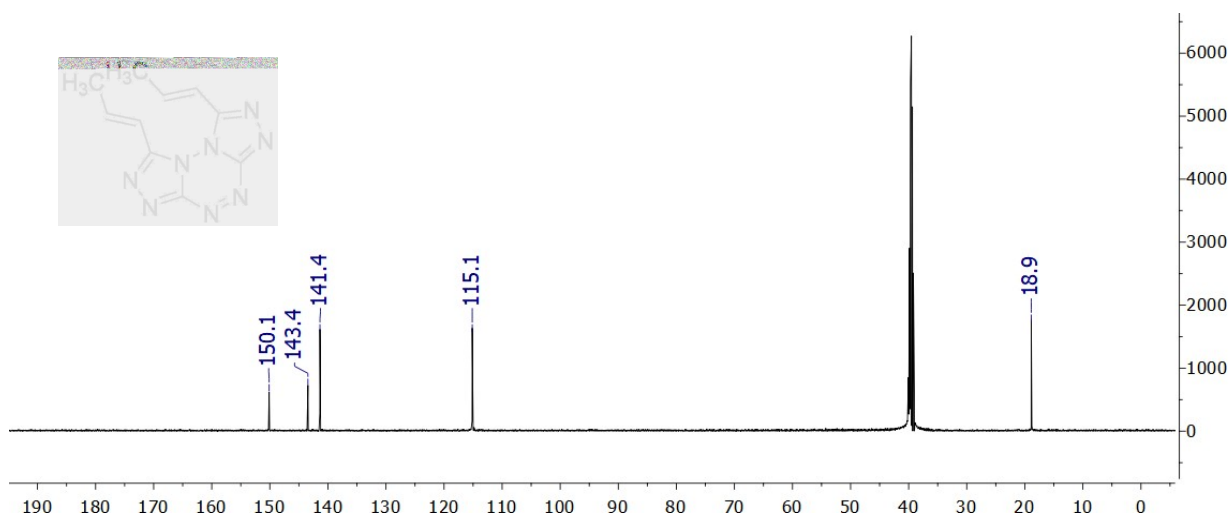

**Figure S37.**  $^{13}\text{C}$  NMR spectrum of the 1,8-di(propen-1-yl)bis[1,2,4]triazolo[4,3-*b*:3',4']-[1,2,4,5]tetrazine (**3g**).

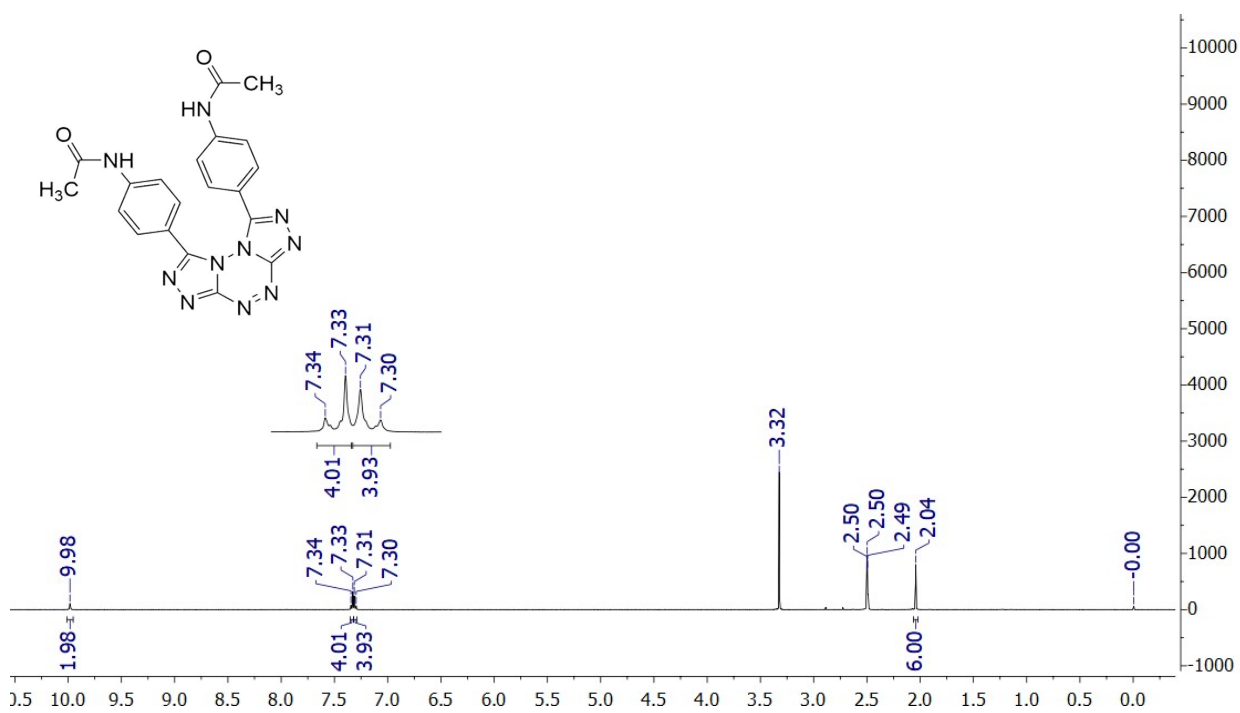

**Figure S38.**  $^1\text{H}$  NMR spectrum of the 1,8-di(4-acetamidophenyl)bis[1,2,4]triazolo[4,3-*b*:3',4']-[1,2,4,5]tetrazine (**3h**).

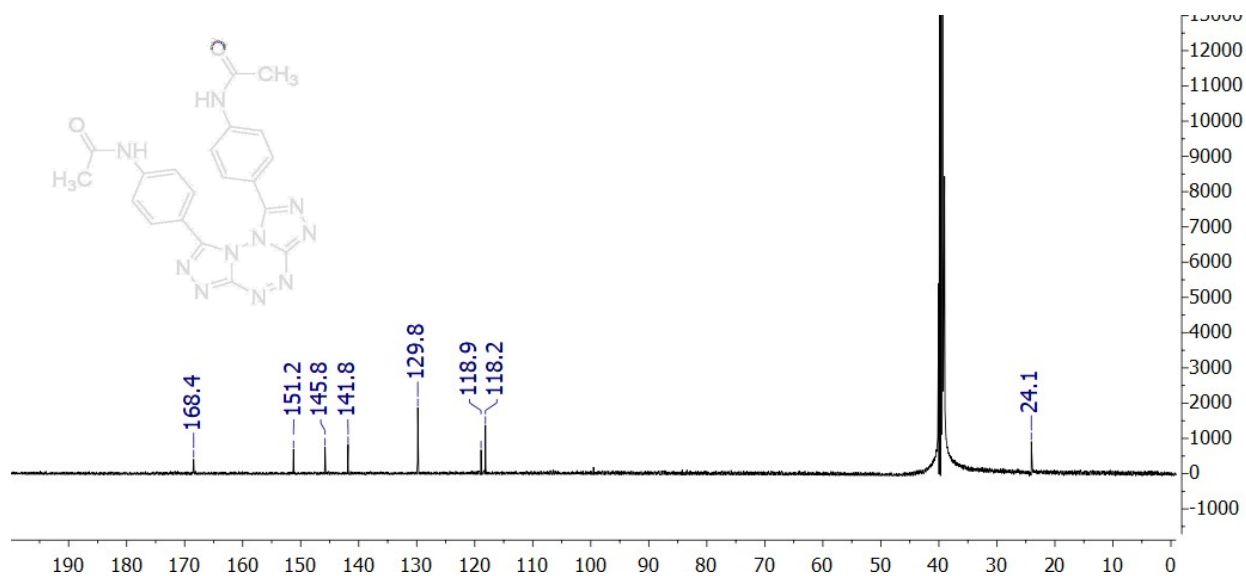

**Figure S39.** <sup>13</sup>C NMR spectrum of the 1,8-di(4-acetamidophenyl)bis[1,2,4]triazolo[4,3-*b*:3',4'-*f*][1,2,4,5]tetrazine (**3h**).

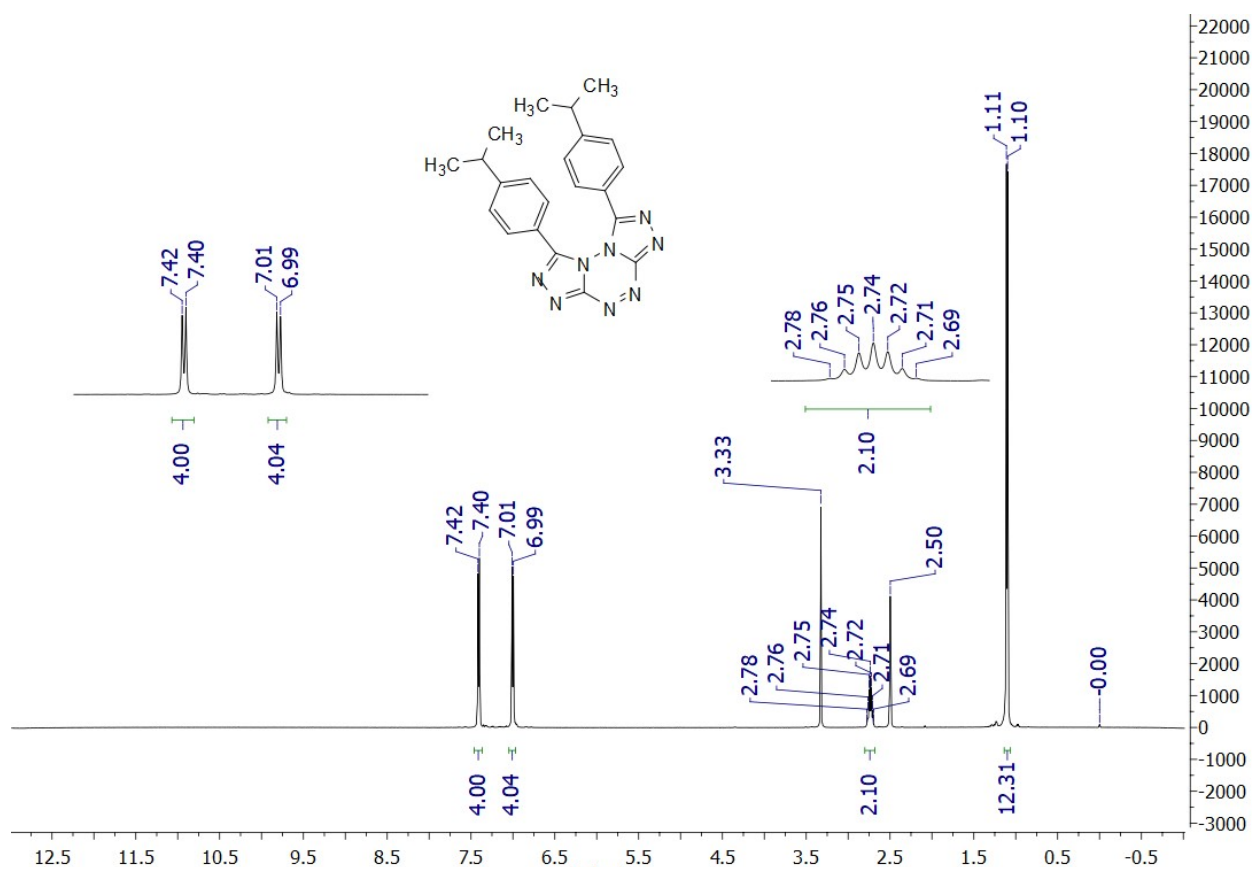

**Figure S40.** <sup>1</sup>H NMR spectrum of the 1,8-di(4-isopropylphenyl)bis[1,2,4]triazolo[4,3-*b*:3',4'-*f*][1,2,4,5]tetrazine (**3i**).

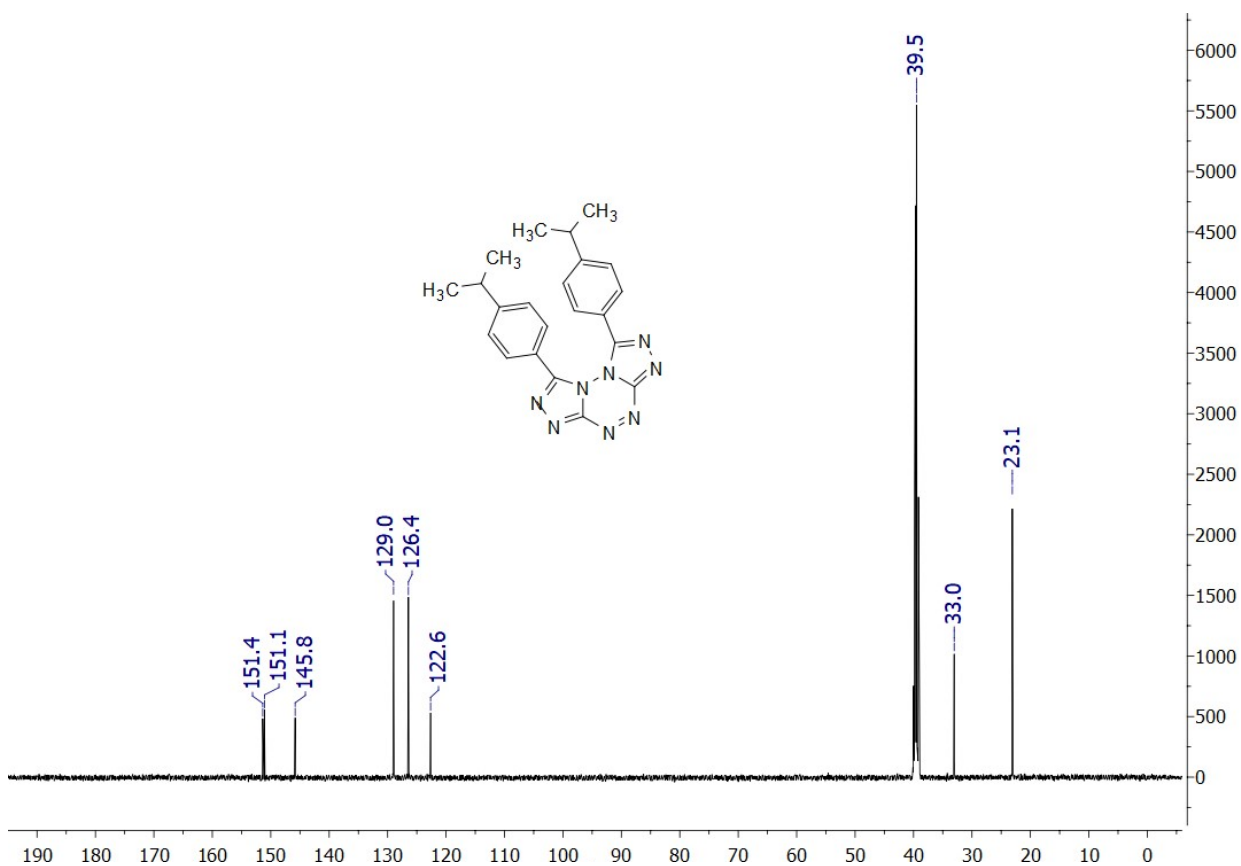

**Figure S41.**  $^{13}\text{C}$  NMR spectrum of the 1,8-di(4-isopropylphenyl)bis[1,2,4]triazolo[4,3-*b*:3',4'-*f*][1,2,4,5]tetrazine (**3i**).

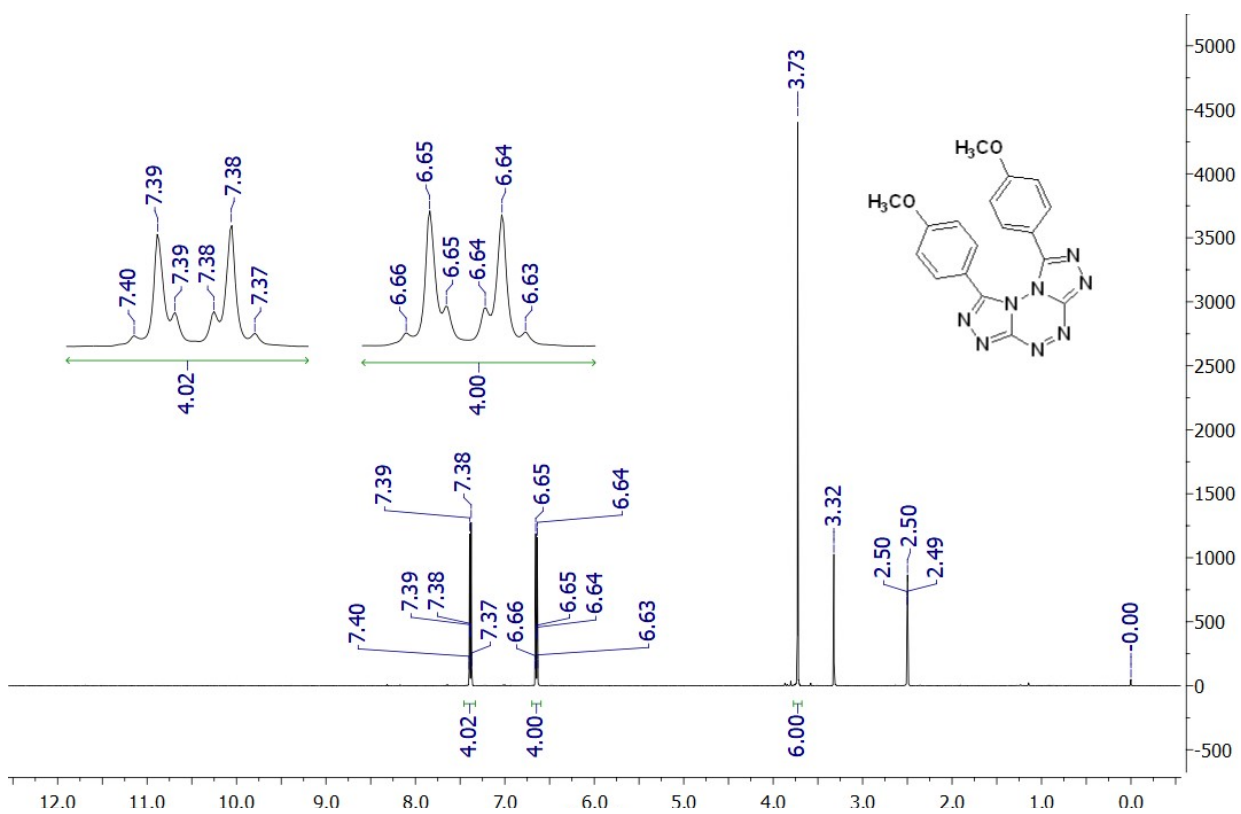

**Figure S42.**  $^1\text{H}$  NMR spectrum of the 1,8-di(4-methoxyphenyl)bis[1,2,4]triazolo[4,3-*b*:3',4'-*f*][1,2,4,5]tetrazine (**3j**).



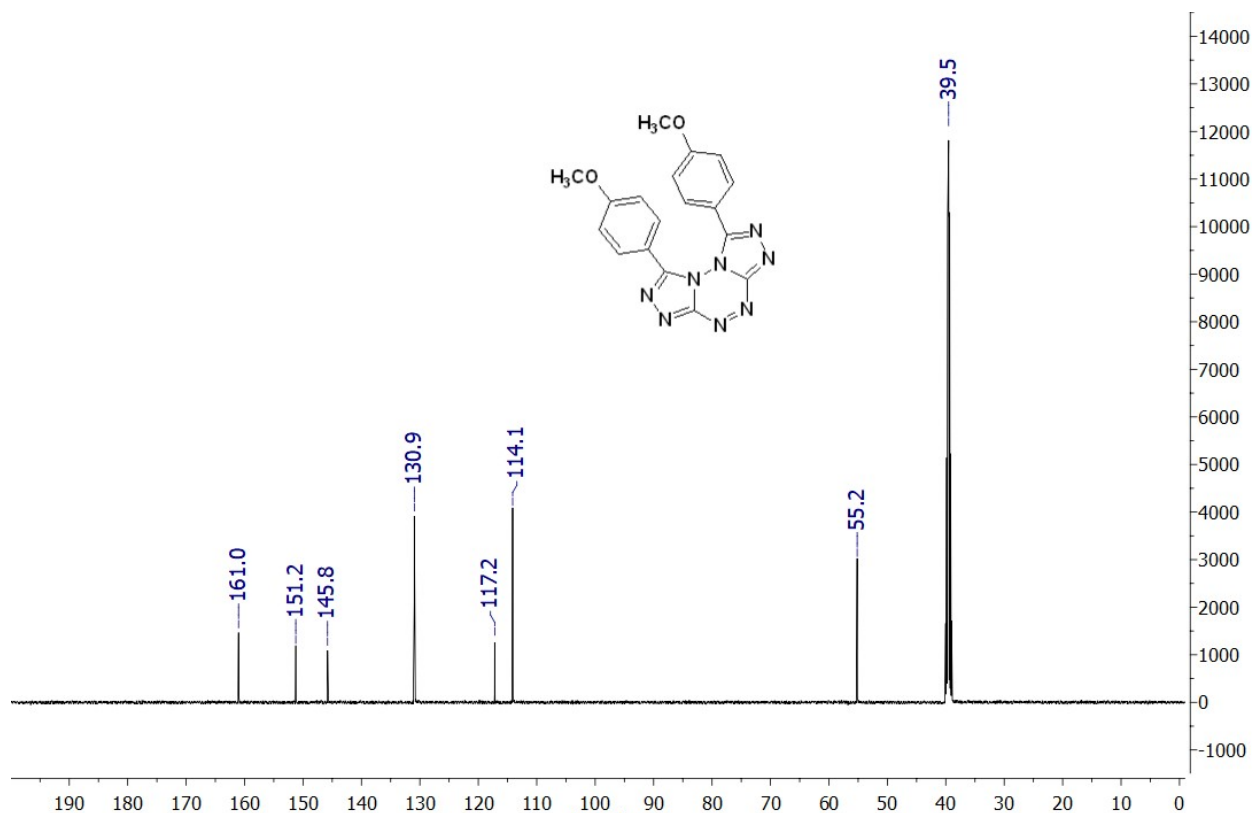

**Figure S43.**  $^{13}\text{C}$  NMR spectrum of the 1,8-di(4-methoxyphenyl)bis[1,2,4]triazolo[4,3-*b*:3',4'-*f*][1,2,4,5]tetrazine (**3j**).

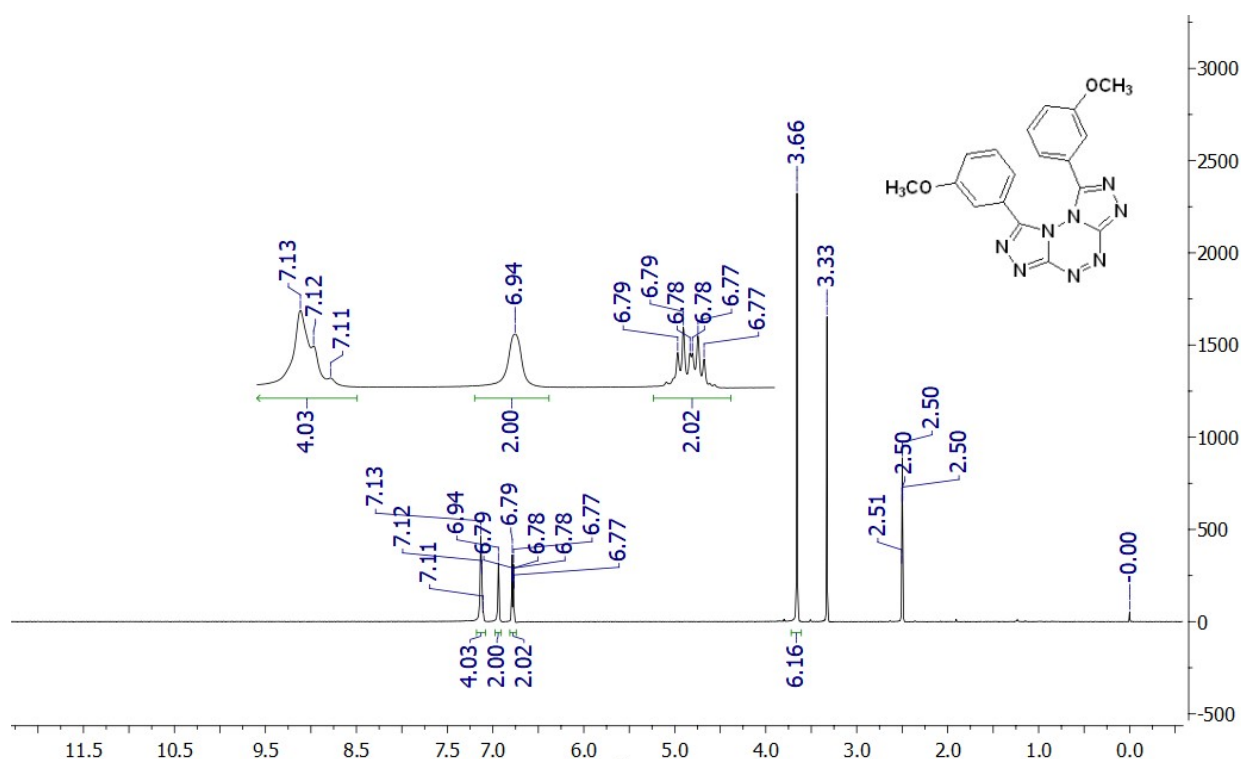

**Figure S44.**  $^1\text{H}$  NMR spectrum of the 1,8-di(3-methoxyphenyl)bis[1,2,4]triazolo[4,3-*b*:3',4'-*f*][1,2,4,5]tetrazine (**3k**).

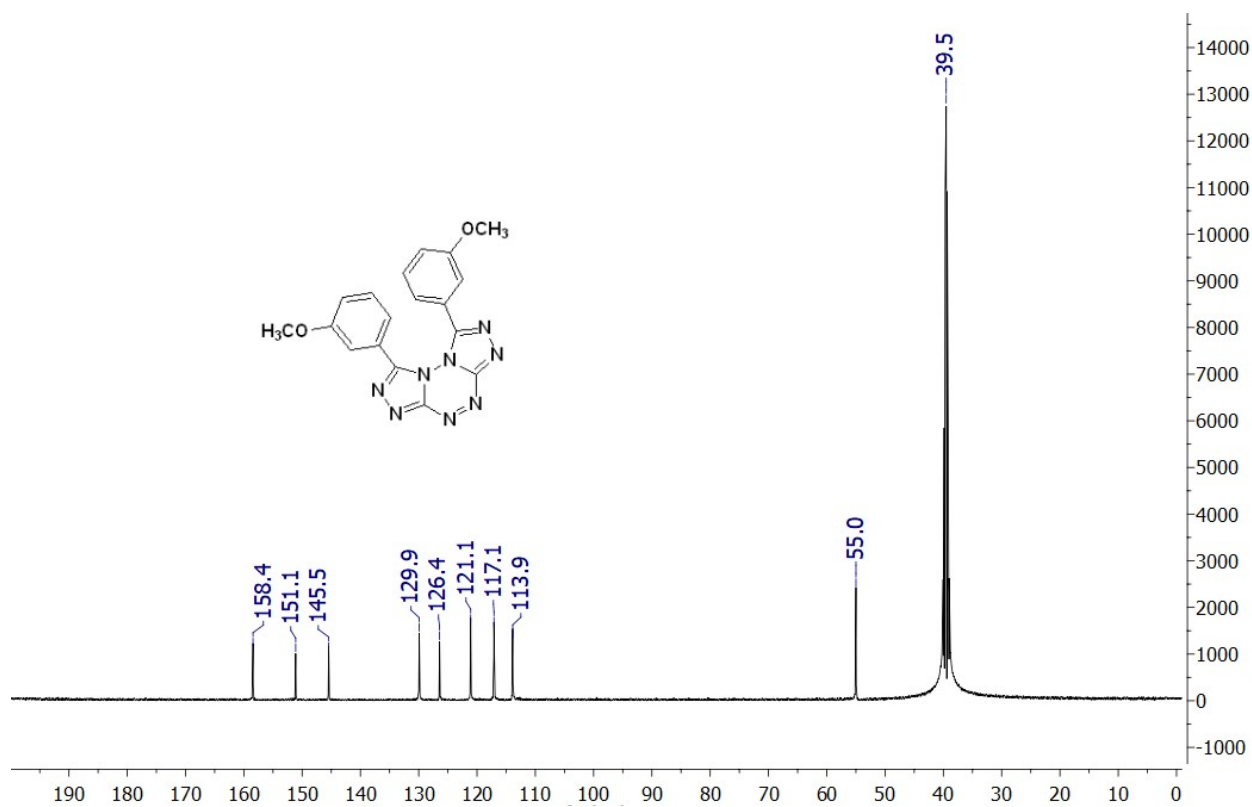

**Figure S45.**  $^{13}\text{C}$  NMR spectrum of the 1,8-di(3-methoxyphenyl)bis[1,2,4]triazolo[4,3-*b*:3',4'-*f*][1,2,4,5]tetrazine (**3k**).

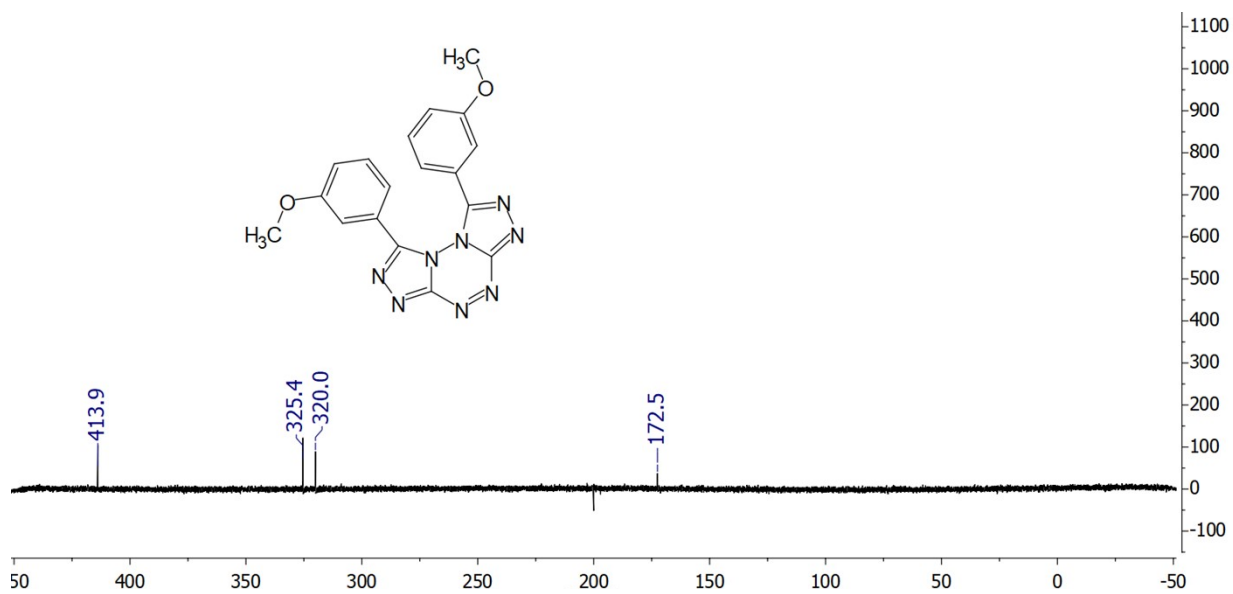

**Figure S46.**  $^{15}\text{N}$  NMR spectrum of the 1,8-di(3-methoxyphenyl)bis[1,2,4]triazolo[4,3-*b*:3',4'-*f*][1,2,4,5]tetrazine (**3k**).

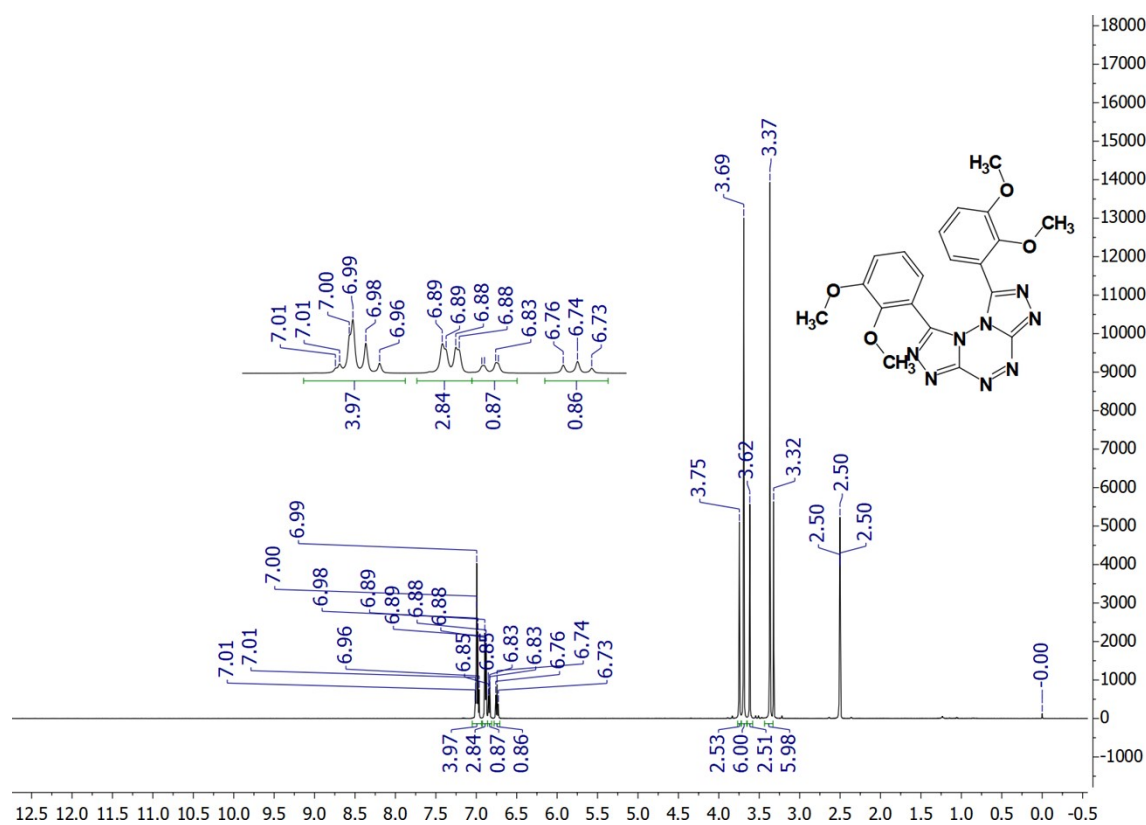

**Figure S47.** <sup>1</sup>H NMR spectrum of the 1,8-di(2,3-dimethoxyphenyl)bis[1,2,4]triazolo[4,3-*b*:3',4'-*f*][1,2,4,5]tetrazine (**31**).

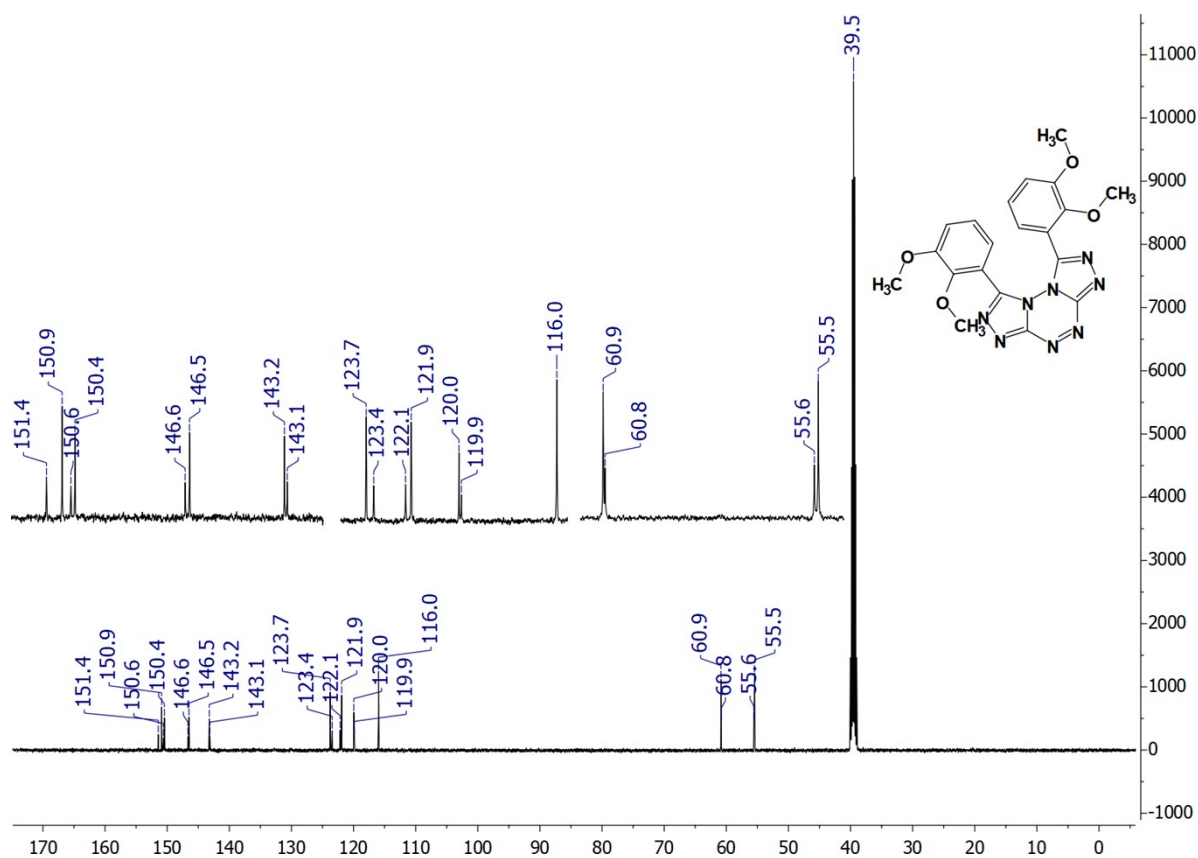

**Figure S48.** <sup>13</sup>C NMR spectrum of the 1,8-di(2,3-dimethoxyphenyl)bis[1,2,4]triazolo[4,3-*b*:3',4'-*f*][1,2,4,5]tetrazine (**31**).

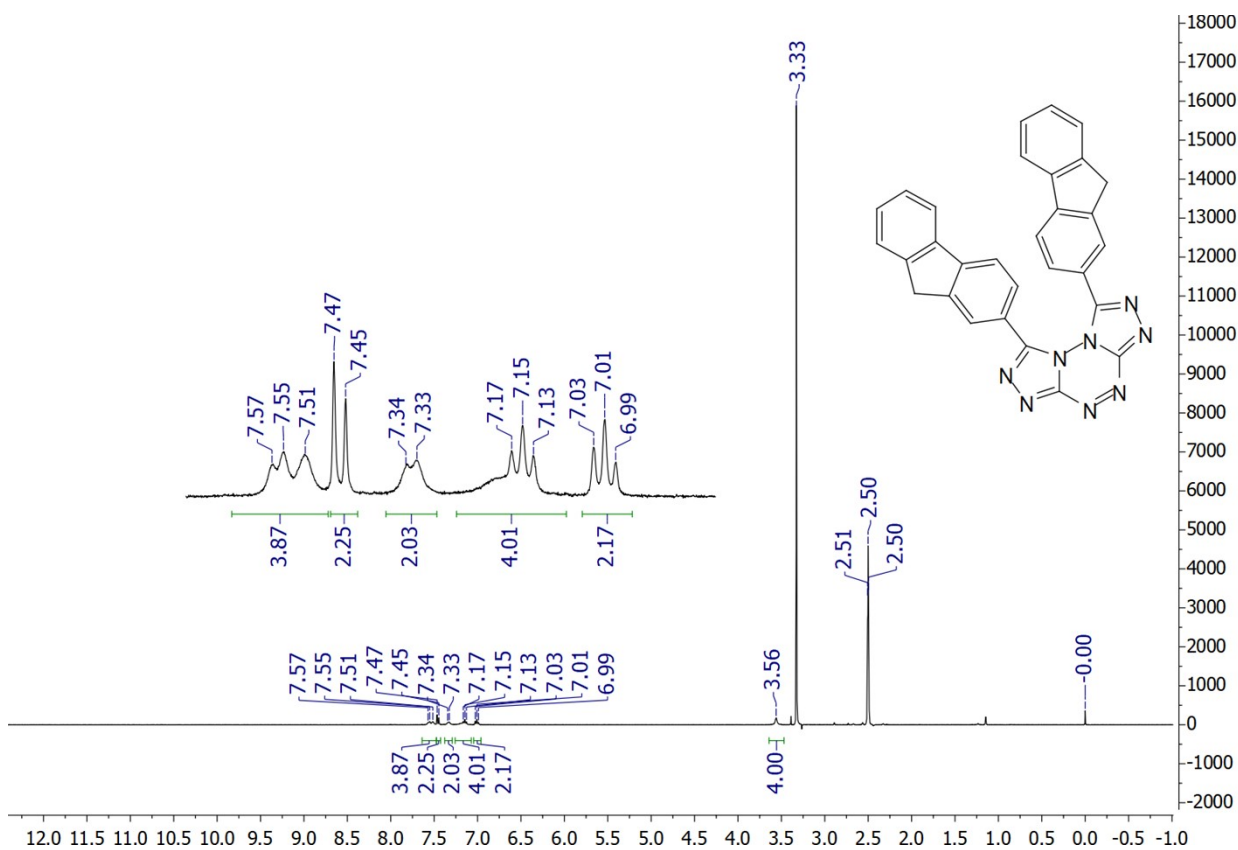

**Figure S49.** <sup>1</sup>H NMR spectrum of the 1,8-di(9H-fluoren-2-yl)bis[1,2,4]triazolo[4,3-*b*:3',4'-*f*][1,2,4,5]tetrazine (**3n**).

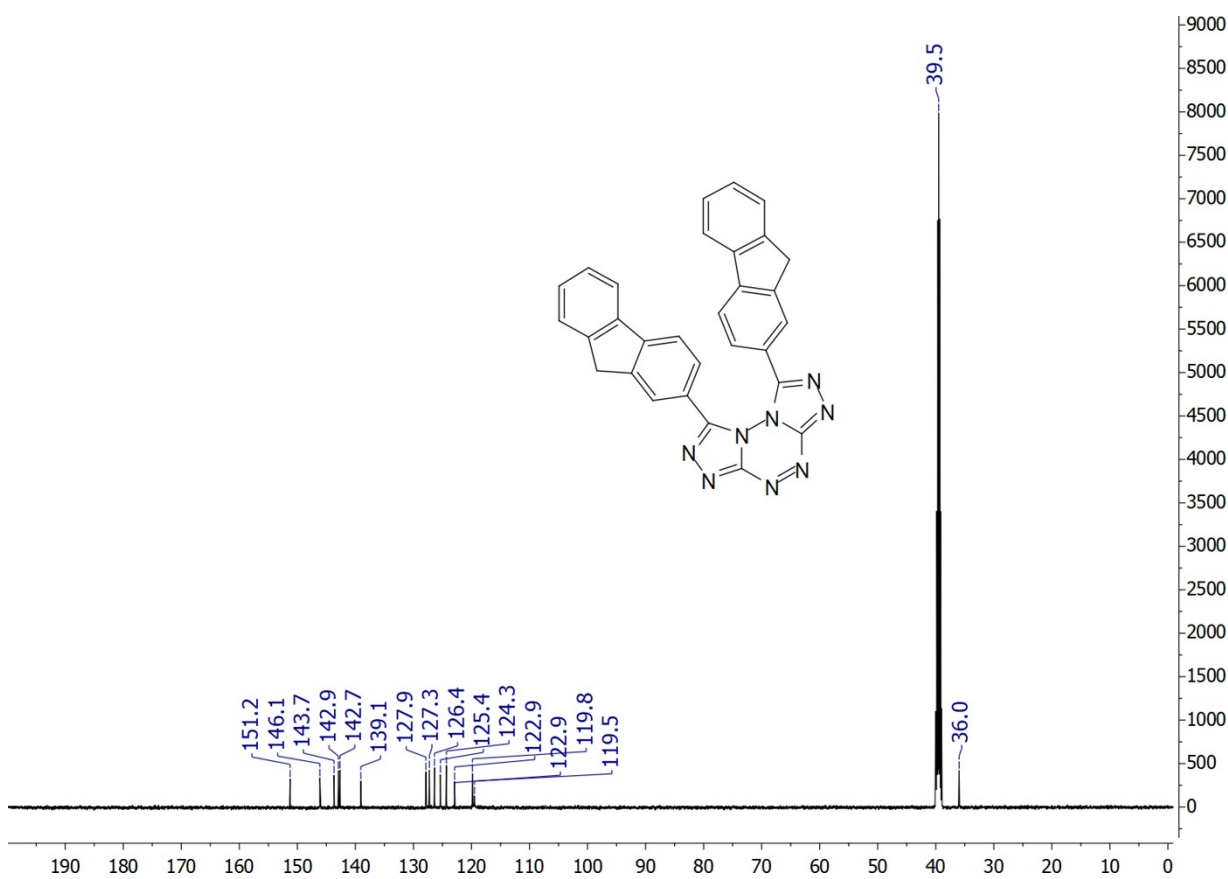

**Figure S50.** <sup>13</sup>C NMR spectrum of the 1,8-di(9H-fluoren-2-yl)bis[1,2,4]triazolo[4,3-*b*:3',4'-*f*][1,2,4,5]tetrazine (**3n**).

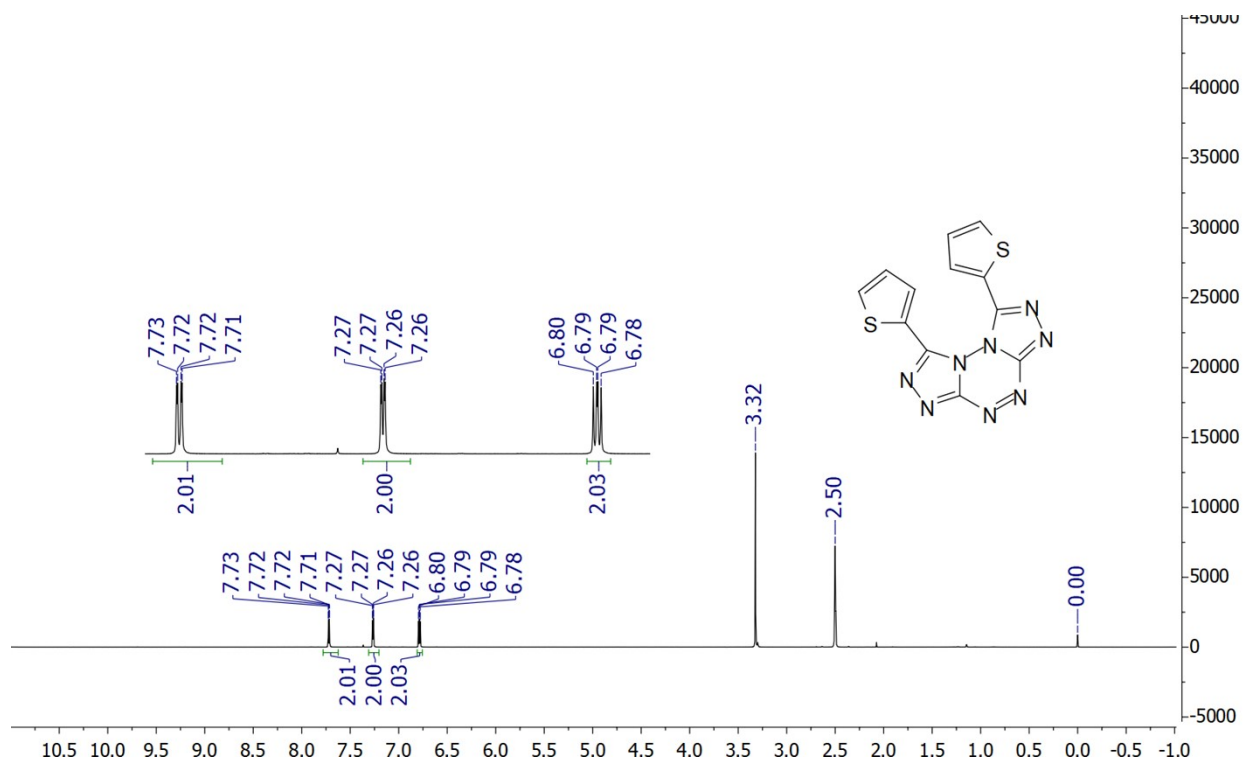

**Figure S51.**  $^1\text{H}$  NMR spectrum of the 1,8-di(thiophen-2-yl)bis[1,2,4]triazolo[4,3-*b*:3',4'-*f*][1,2,4,5]tetrazine (**3o**)

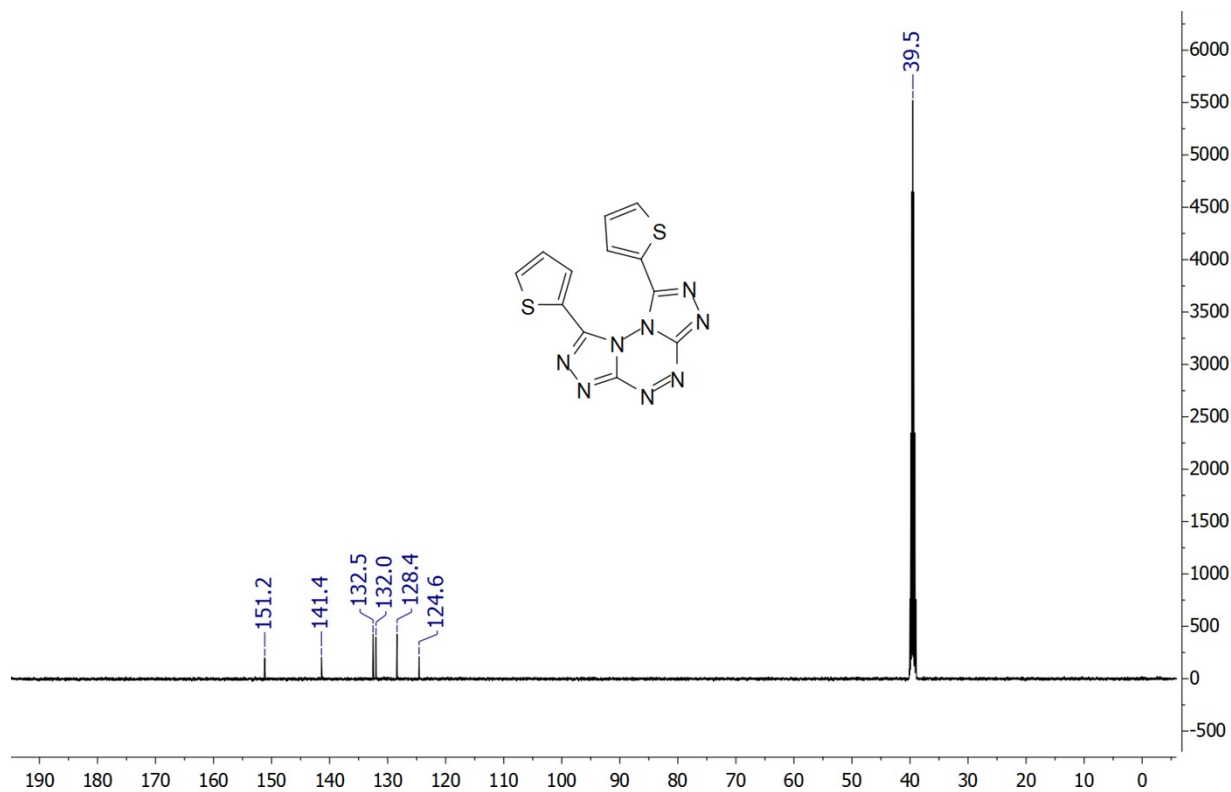

**Figure S52.**  $^{13}\text{C}$  NMR spectrum of the 1,8-di(thiophen-2-yl)bis[1,2,4]triazolo[4,3-*b*:3',4'-*f*][1,2,4,5]tetrazine (**3o**)

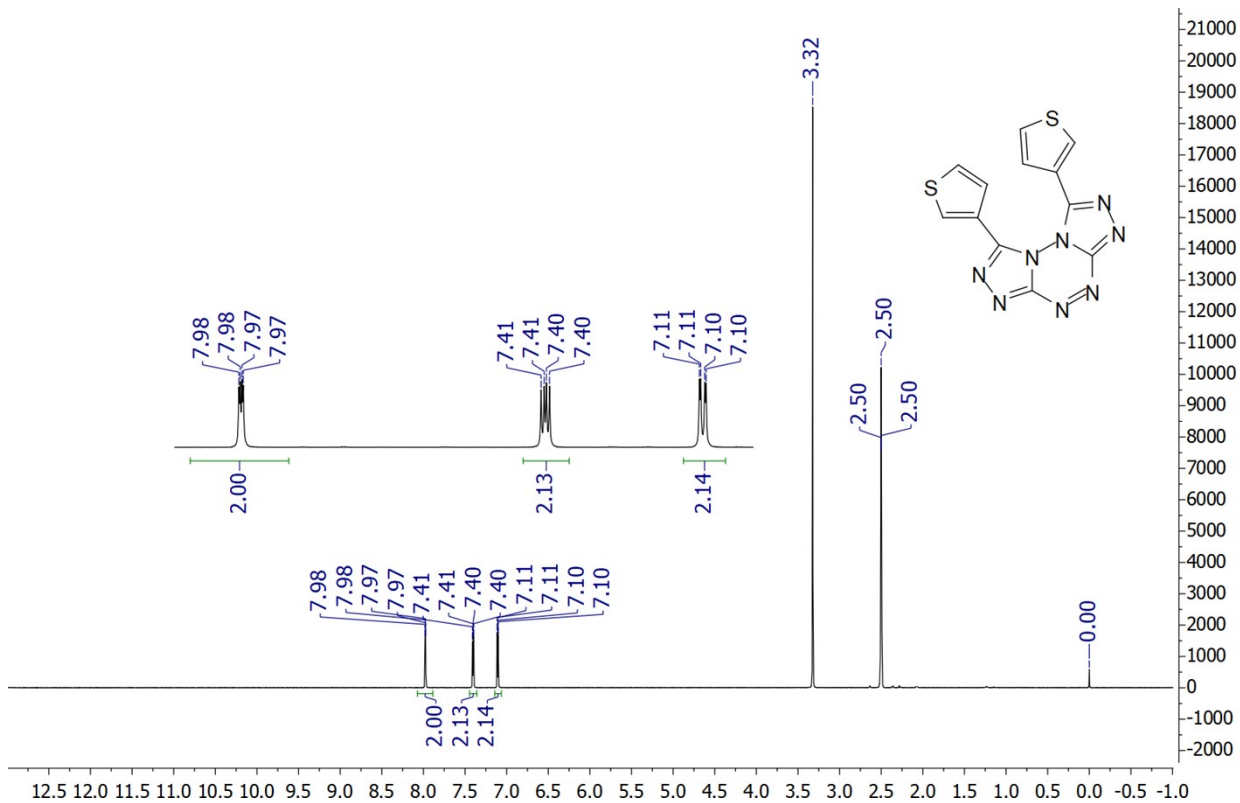

**Figure S53.** <sup>1</sup>H NMR spectrum of the 1,8-di(thiophen-3-yl)bis[1,2,4]triazolo[4,3-*b*:3',4'-*f*][1,2,4,5]tetrazine (**3p**)

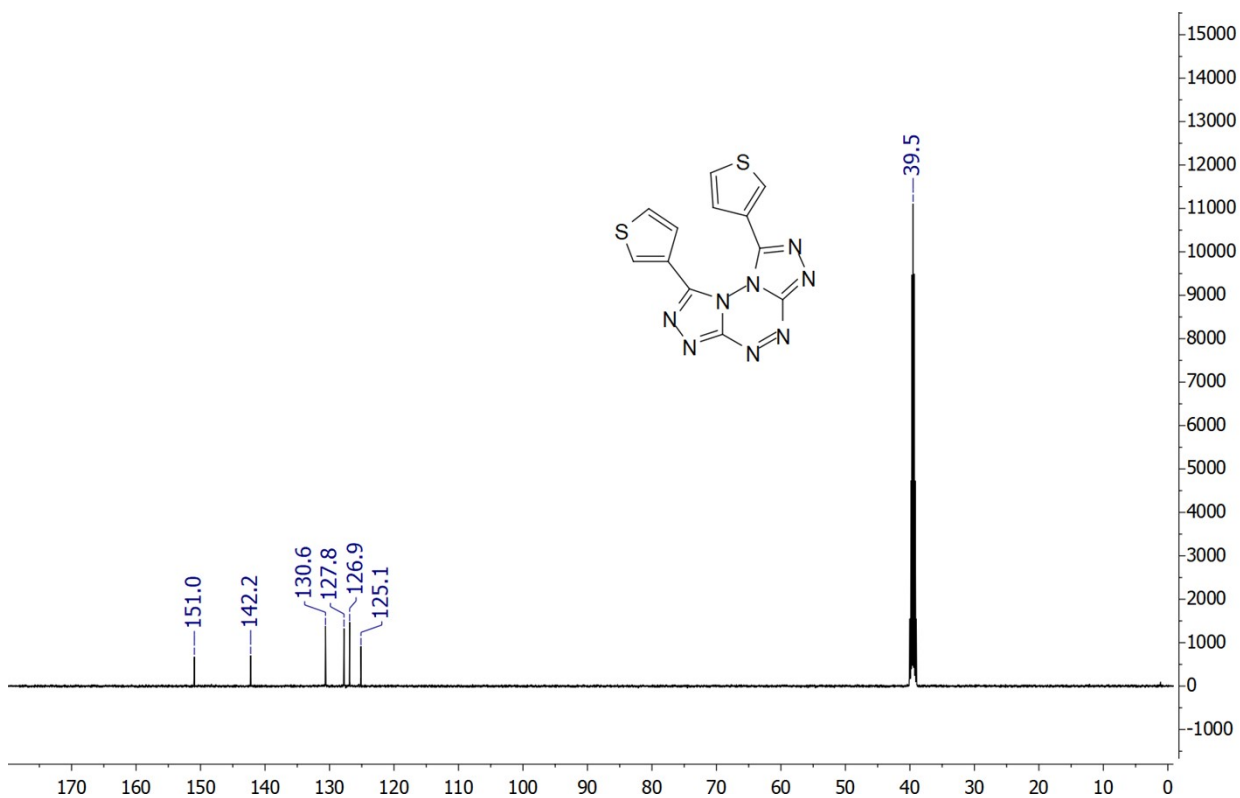

**Figure S54.** <sup>13</sup>C NMR spectrum of the 1,8-di(thiophen-3-yl)bis[1,2,4]triazolo[4,3-*b*:3',4'-*f*][1,2,4,5]tetrazine (**3p**)

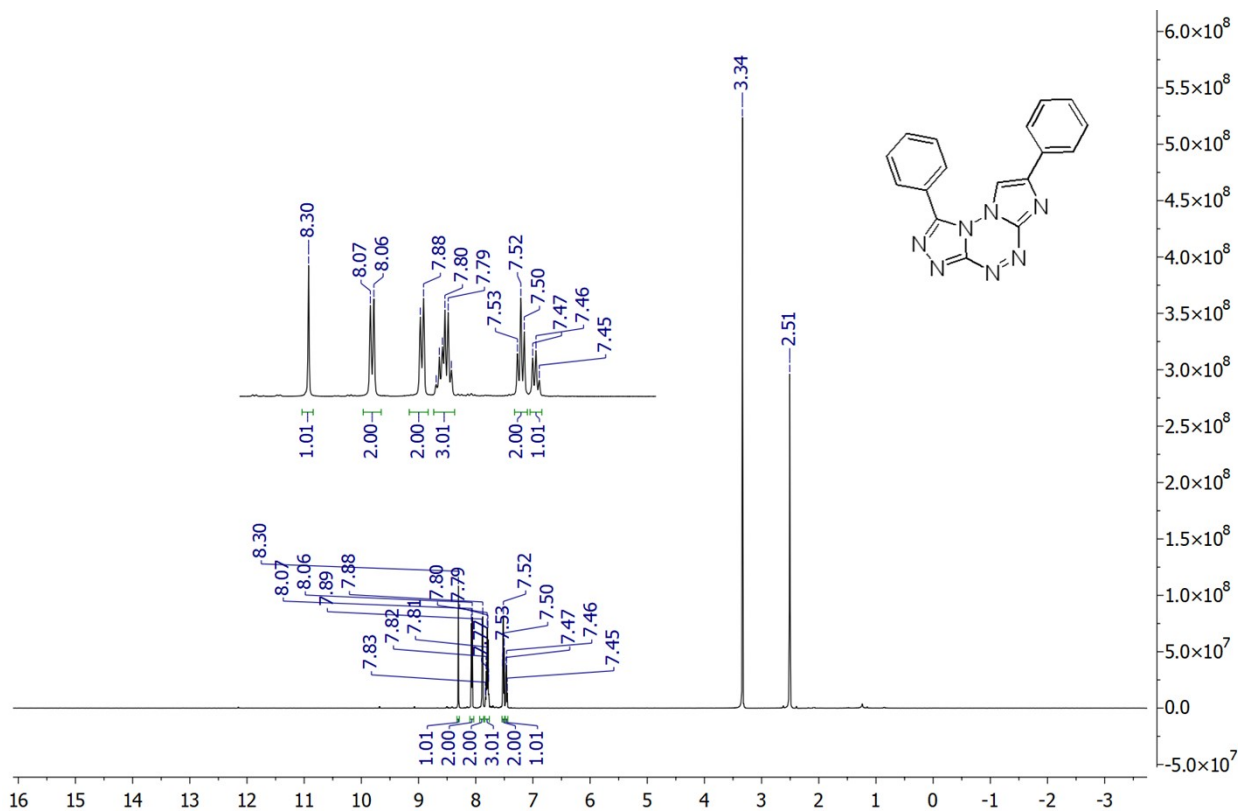

**Figure S55.**  $^1\text{H}$  NMR spectrum of the 1,7-diphenylimidazo[1,2-*b*][1,2,4]triazolo[3,4-*f*][1,2,4,5]tetrazine (**5-cis**)

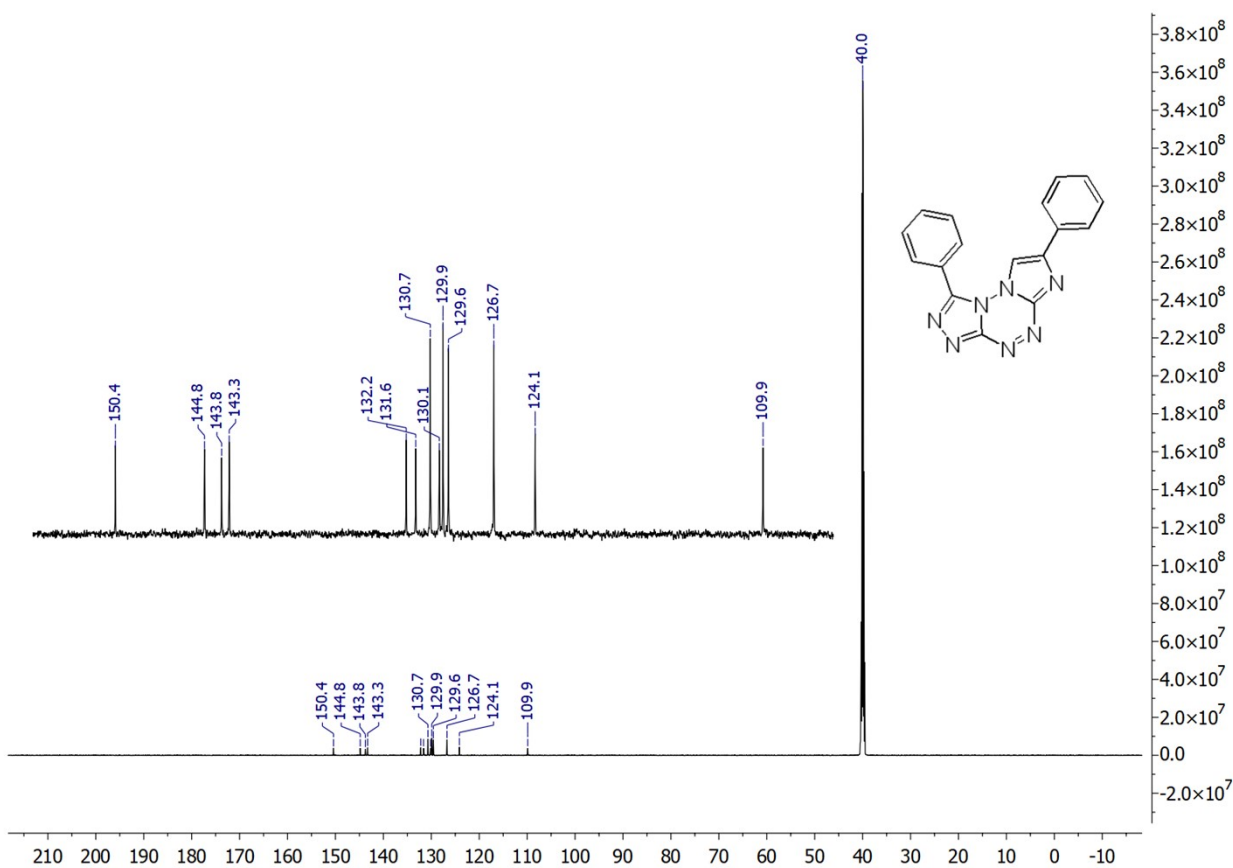

**Figure S56.**  $^{13}\text{C}$  NMR spectrum of the 1,7-diphenylimidazo[1,2-*b*][1,2,4]triazolo[3,4-*f*][1,2,4,5]tetrazine (**5-cis**)



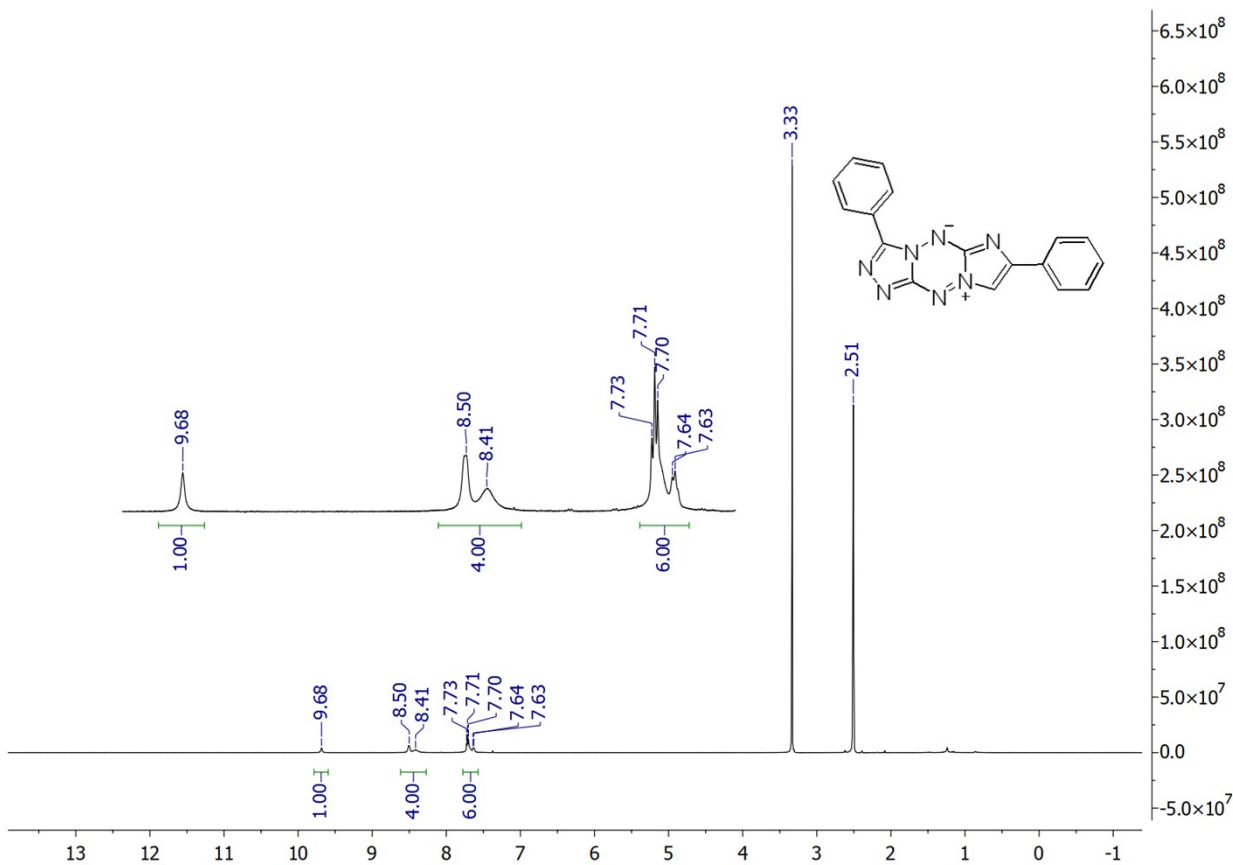

**Figure S57.**  $^1\text{H}$  NMR spectrum of the 1,7-diphenylimidazo[1,2-*b*][1,2,4]triazolo[4,3-*e*][1,2,4,5]tetrazine (**5-trans**)

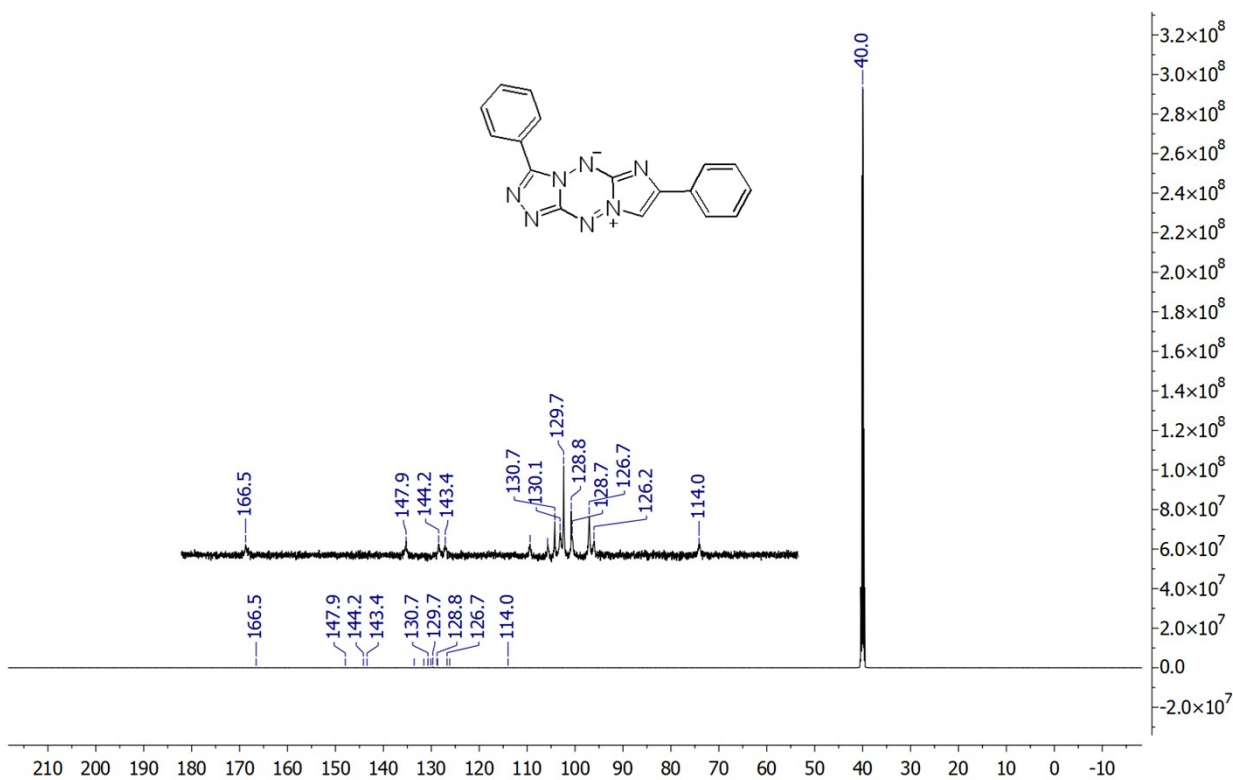

**Figure S58.**  $^{13}\text{C}$  NMR spectrum of the 1,7-diphenylimidazo[1,2-*b*][1,2,4]triazolo[4,3-*e*][1,2,4,5]tetrazine (**5-trans**)



### 3. X-ray data

The X-ray crystallography data for the structures was deposited with Cambridge Crystallography Data Centre as supplementary publication CCDC 2301657 (compound **3a**) and CCDC 2301658 (compound **3l**). These data can be obtained free of charge from the Cambridge Crystallographic Data Centre via [www.ccdc.cam.ac.uk/data\\_request/cif](http://www.ccdc.cam.ac.uk/data_request/cif).

**3a:** Yellow needle crystal 0.51x0.26x0.05 mm. On the angles  $5.40 < 2\theta < 52.78^\circ$  6837 reflections was collected, 4592 independent reflections ( $R_{\text{int}} = 0.0471$ ), 1720 reflections with  $I > 2\sigma(I)$ . Completeness 98.2 %. Absorption correction not applied ( $\mu = 0.093 \text{ mm}^{-1}$ ). Crystal system is orthorhombic, space group  $P2_12_12$ ,  $a = 21.273(4) \text{ \AA}$ ,  $b = 7.2489(12) \text{ \AA}$ ,  $c = 15.064(3) \text{ \AA}$ ,  $V = 2322.9(7) \text{ \AA}^3$ , formula  $C_{50}H_{33}N_{25}$  (for  $Z = 2$ ). Final refinement parameters:  $R_1 = 0.1546$ ,  $wR_2 = 0.0579$  (all data),  $R_1 = 0.0407$ ,  $wR_2 = 0.0456$  ( $I > 2\sigma(I)$ ),  $\text{Goof} = 0.717$ . Maximum/minimum of residual electronic density  $\Delta\rho_e = 0.146/-0.160 \text{ e\AA}^{-3}$ .

**3l:** Brown prismatic crystal 0.35x0.30x0.25 mm. On the angles  $5.42 < 2\theta < 52.74^\circ$  17062 reflections were collected, 5705 independent reflections ( $R_{\text{int}} = 0.0688$ ), 1913 reflections with  $I > 2\sigma(I)$ . Completeness 99.0 %. Empirical absorption correction was applied ( $\mu = 0.100 \text{ mm}^{-1}$ ). Crystal system is monoclinic, space group  $P2/c$ ,  $a = 14.290(3) \text{ \AA}$ ,  $b = 7.870(3) \text{ \AA}$ ,  $c = 25.420(9) \text{ \AA}$ ,  $\beta = 100.45(2)^\circ$ ,  $V = 2811.2(17) \text{ \AA}^3$ , formula  $C_{29}H_{27}N_8O_6$  (for  $Z = 4$ ). Final refinement parameters:  $R_1 = 0.1729$ ,  $wR_2 = 0.0505$  (all data),  $R_1 = 0.0436$ ,  $wR_2 = 0.0453$  ( $I > 2\sigma(I)$ ),  $\text{Goof} = 0.886$ . Maximum/minimum of residual electronic density  $\Delta\rho_e = 0.174/-0.147 \text{ e\AA}^{-3}$ .

## 4. Quantum chemical calculations

### 4.1 DFT calculations

**Table S2.** Visualization of the electron density distribution of HOMO and LUMO in series of compounds **3** (PBE0/def2-TZVP).

| Comp.     | Structure                                                                           | HOMO                                                                                             | LUMO                                                                                              |
|-----------|-------------------------------------------------------------------------------------|--------------------------------------------------------------------------------------------------|---------------------------------------------------------------------------------------------------|
| <b>3a</b> | 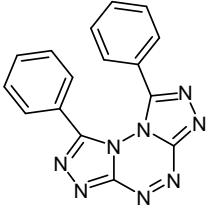   | <br>-7.11 eV   | <br>-3.24 eV   |
| <b>3b</b> |   | <br>-7.94 eV   | <br>-3.73eV    |
| <b>3c</b> |  | <br>-7.18 eV | <br>-3.35 eV |

|                  |                                                                                     |                                                                                                      |                                                                                                       |
|------------------|-------------------------------------------------------------------------------------|------------------------------------------------------------------------------------------------------|-------------------------------------------------------------------------------------------------------|
| <p><b>3d</b></p> | 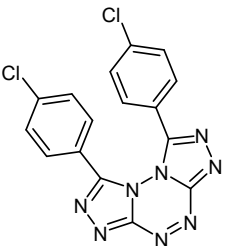   |  <p>-7.16 eV</p>   |  <p>-3.40 eV</p>   |
| <p><b>3e</b></p> |    |  <p>-7.13 eV</p>   |  <p>-3.43 eV</p>   |
| <p><b>3f</b></p> |   |  <p>-7.87 eV</p>   |  <p>-3.89 eV</p>   |
| <p><b>3g</b></p> |  |  <p>-7.11 eV</p> |  <p>-3.13 eV</p> |

|                  |                                                                                     |                                                                                                      |                                                                                                       |
|------------------|-------------------------------------------------------------------------------------|------------------------------------------------------------------------------------------------------|-------------------------------------------------------------------------------------------------------|
| <p><b>3h</b></p> | 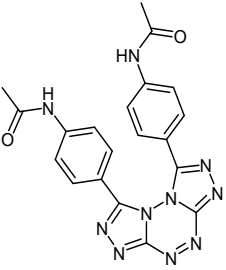   |  <p>-6.76 eV</p>   |  <p>-3.14 eV</p>   |
| <p><b>3i</b></p> |    |  <p>-6.86 eV</p>   |  <p>-3.13 eV</p>   |
| <p><b>3j</b></p> |   |  <p>-6.55 eV</p>  |  <p>-3.04 eV</p>  |
| <p><b>3k</b></p> |  |  <p>-6.73 eV</p> |  <p>-3.19 eV</p> |

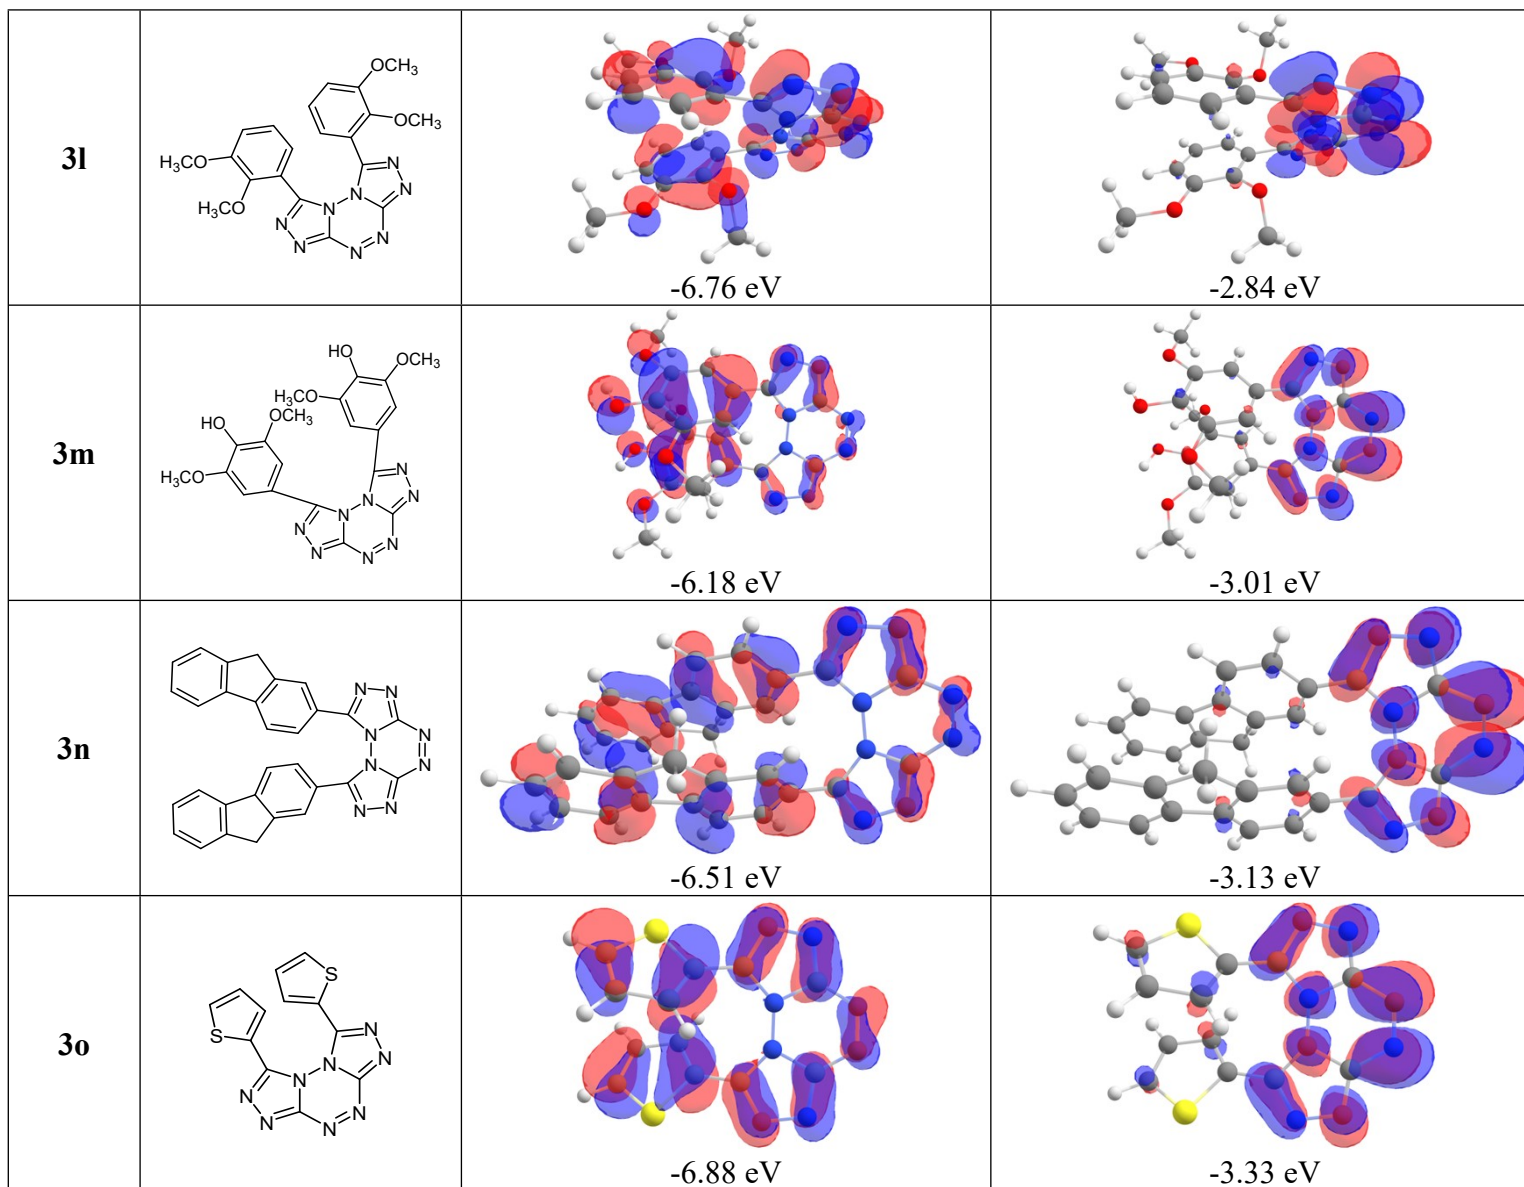

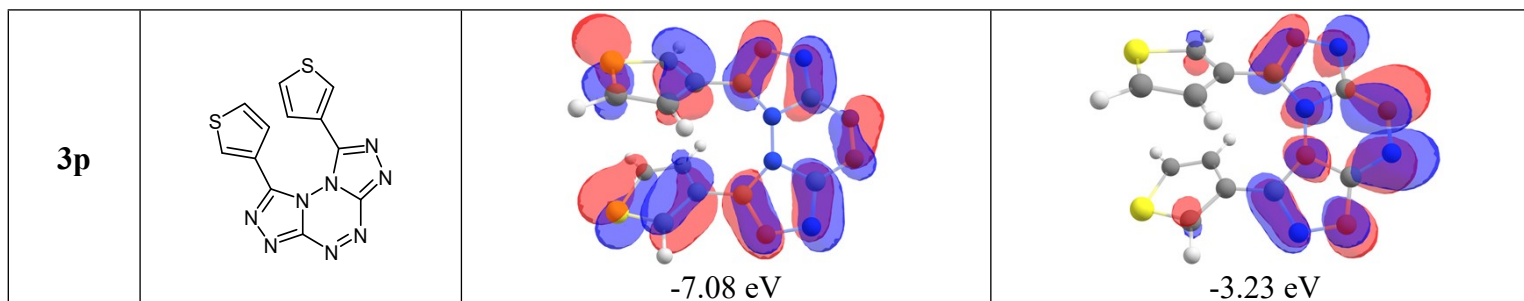

Visualization of orbitals for B3LYP/6-311G\* is not presented, because visually they are similar to those presented above; the values of the calculated energies are given in **Table S3** below.



**Table S3.** Calculated energies HOMO, LUMO; width of theoretical and optical band gaps

| Co mp. | HOMO (B3LYP/6-311G*), eV | LUMO (B3LYP/6-311G*), eV | HOMO (PBE0/def2-TZPV), eV | LUMO (PBE0/def2-TZPV), eV | $\Delta E$ (B3LYP/6-311G*), eV | $\Delta E$ (PBE0/def2-TZPV), eV | $\Delta E_{opt}$ , eV |
|--------|--------------------------|--------------------------|---------------------------|---------------------------|--------------------------------|---------------------------------|-----------------------|
| 3a     | -6.78                    | -3.33                    | -7.11                     | -3.24                     | 3.45                           | 3.87                            | 2.62                  |
| 3b     | -7.69                    | -3.88                    | -7.94                     | -3.73                     | 3.80                           | 4.21                            | 2.96                  |
| 3c     | -6.88                    | -3.47                    | -7.18                     | -3.35                     | 3.41                           | 3.82                            | 2.63                  |
| 3d     | -6.91                    | -3.54                    | -7.16                     | -3.40                     | 3.37                           | 3.76                            | 2.62                  |
| 3e     | -6.83                    | -3.54                    | -7.14                     | -3.43                     | 3.30                           | 3.71                            | 2.62                  |
| 3f     | -7.56                    | -3.98                    | -7.87                     | -3.89                     | 3.58                           | 3.98                            | 2.78                  |
| 3g     | -7.11                    | -3.60                    | -7.11                     | -3.13                     | 3.52                           | 3.98                            | 2.68                  |
| 3h     | -6.39                    | -3.24                    | -6.76                     | -3.14                     | 3.15                           | 3.62                            | 2.21                  |
| 3i     | -6.56                    | -3.23                    | -6.86                     | -3.13                     | 3.32                           | 3.73                            | 2.52                  |
| 3j     | -6.23                    | -3.14                    | -6.55                     | -3.04                     | 3.09                           | 3.51                            | 2.46                  |
| 3k     | -6.39                    | -3.28                    | -6.73                     | -3.19                     | 3.10                           | 3.55                            | 2.60                  |
| 3l     | -6.36                    | -2.88                    | -6.76                     | -2.84                     | 3.48                           | 3.92                            | 2.55                  |
| 3m     | -5.88                    | -3.13                    | -6.18                     | -3.01                     | 2.75                           | 3.17                            | -                     |
| 3n     | -6.18                    | -3.22                    | -6.51                     | -3.13                     | 2.96                           | 3.39                            | 2.51                  |
| 3o     | -6.57                    | -3.44                    | -6.88                     | -3.33                     | 3.13                           | 3.55                            | 2.35                  |
| 3p     | -6.80                    | -3.36                    | -7.08                     | -3.25                     | 3.44                           | 3.83                            | 2.52                  |

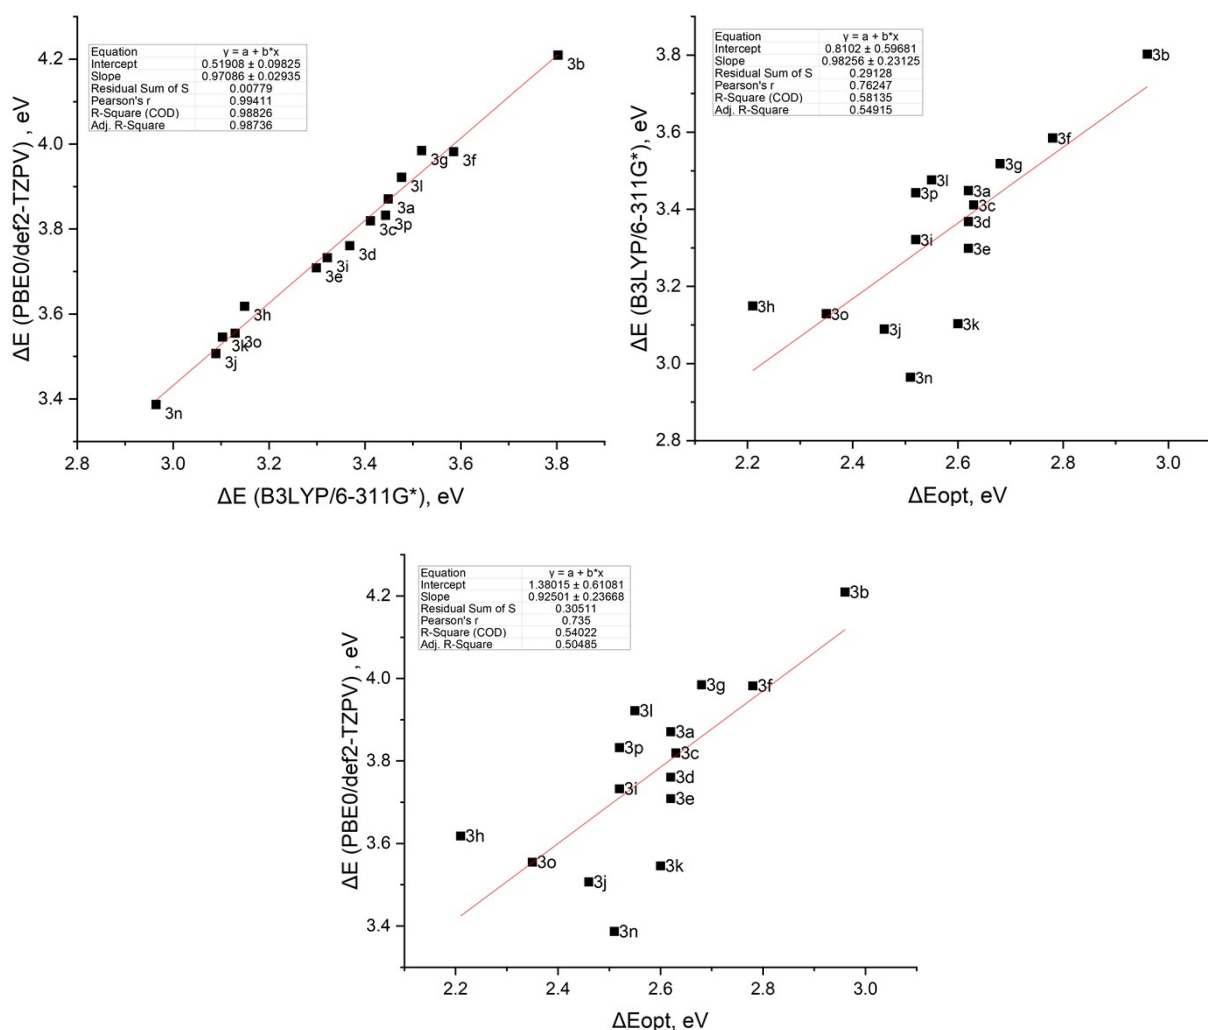

**Fig S59.** Linear correlation between theoretical bandgap from DFT calculations and optical bandgap from absorption-emission spectra ( $\Delta E_{opt}$ ).  $\Delta E_{opt}$  is calculated as the intersection point of the reduced and normalized absorption and emission spectra.<sup>8</sup>

## 4.2 TDDFT

**Table S4.** Data for calculated (first ten transitions) and experimental absorption spectra

| №         | PBE0 def2-TZVP (MeCN)     |                |       |       | B3LYP 6-311G* (MeCN)      |                |       |       | CAM-B3LYP 6-311G* (MeCN)  |                |       |        | Experimental           |
|-----------|---------------------------|----------------|-------|-------|---------------------------|----------------|-------|-------|---------------------------|----------------|-------|--------|------------------------|
|           | $\nu$ (cm <sup>-1</sup> ) | $\lambda$ (nm) | $f$   |       | $\nu$ (cm <sup>-1</sup> ) | $\lambda$ (nm) | $f$   |       | $\nu$ (cm <sup>-1</sup> ) | $\lambda$ (nm) | $f$   |        | $\lambda$ (ε/f)*       |
| <b>3a</b> | 1                         | 23343.6        | 428.4 | 0.124 | 1                         | 21496.9        | 465.2 | 0.098 | 1                         | 26219.5        | 381.4 | 0.088  | 350-440<br>(4.5/0.181) |
|           | 2                         | 26631.2        | 375.5 | 0.012 | 2                         | 25910.9        | 385.9 | 0.017 | 2                         | 27658.5        | 361.6 | 0.120  |                        |
|           | 3                         | 28661.0        | 348.9 | 0.023 | 3                         | 25932.1        | 385.6 | 0.007 | 3                         | 35315.5        | 283.2 | 0.015  |                        |
|           | 4                         | 30377.4        | 329.2 | 0.030 | 4                         | 27852.0        | 359.0 | 0.025 | 4                         | 35632.0        | 280.6 | 0.060  |                        |
|           | 5                         | 31491.8        | 317.5 | 0.007 | 5                         | 29584.2        | 338.0 | 0.007 | 5                         | 37287.9        | 268.2 | 0.036  |                        |
|           | 6                         | 31867.2        | 313.8 | 0.060 | 6                         | 29625.8        | 337.5 | 0.056 | 6                         | 37730.1        | 265.0 | 0.004  |                        |
|           | 7                         | 32990.4        | 303.1 | 0.000 | 7                         | 31162.9        | 320.9 | 0.000 | 7                         | 38293.6        | 261.1 | 0.057  |                        |
|           | 8                         | 36012.9        | 277.7 | 0.138 | 8                         | 34128.7        | 293.0 | 0.152 | 8                         | 39945.4        | 250.3 | 0.101  |                        |
|           | 9                         | 36784.7        | 271.9 | 0.356 | 9                         | 35401.6        | 282.5 | 0.268 | 9                         | 41151.5        | 243.0 | 0.135  |                        |
|           | 10                        | 38827.1        | 257.6 | 0.293 | 10                        | 36788.5        | 271.8 | 0.277 | 10                        | 41162.4        | 242.9 | 0.779  |                        |
| <b>3b</b> | 1                         | 25439.5        | 393.1 | 0.052 | 1                         | 24371.0        | 410.3 | 0.060 | 1                         | 26334.1        | 379.7 | 0.011  | 300-390<br>(5.4/0.255) |
|           | 2                         | 27341.2        | 365.7 | 0.090 | 2                         | 26275.2        | 380.6 | 0.052 | 2                         | 30523.4        | 327.6 | 0.226  |                        |
|           | 3                         | 28410.4        | 352.0 | 0.003 | 3                         | 26841.7        | 372.6 | 0.003 | 3                         | 35875.6        | 278.7 | 0.0129 |                        |
|           | 4                         | 29846.2        | 335.1 | 0.017 | 4                         | 28449.5        | 351.5 | 0.014 | 4                         | 37614.7        | 265.9 | 0.000  |                        |
|           | 5                         | 31427.5        | 318.2 | 0.021 | 5                         | 29701.7        | 336.7 | 0.015 | 5                         | 37768.6        | 264.8 | 0.019  |                        |
|           | 6                         | 32757.4        | 305.3 | 0.040 | 6                         | 31131.1        | 321.2 | 0.018 | 6                         | 39311.9        | 254.4 | 0.042  |                        |
|           | 7                         | 34021.0        | 293.9 | 0.033 | 7                         | 32378.6        | 308.8 | 0.036 | 7                         | 40038.3        | 249.8 | 0.011  |                        |
|           | 8                         | 35966.5        | 278.0 | 0.125 | 8                         | 34297.5        | 291.6 | 0.119 | 8                         | 41002.5        | 243.9 | 0.044  |                        |
|           | 9                         | 38528.7        | 259.5 | 0.060 | 9                         | 36724.8        | 272.3 | 0.008 | 9                         | 42575.2        | 234.9 | 0.008  |                        |
|           | 10                        | 39406.2        | 253.8 | 0.048 | 10                        | 37821.6        | 264.4 | 0.352 | 10                        | 42627.5        | 234.6 | 0.014  |                        |
| <b>3c</b> | 1                         | 22930.3        | 436.1 | 0.121 | 1                         | 21136.5        | 473.1 | 0.093 | 1                         | 26133.4        | 382.7 | 0.091  | 337-439<br>(5.1/0.244) |
|           | 2                         | 26644.4        | 375.3 | 0.011 | 2                         | 25961.2        | 385.2 | 0.007 | 2                         | 27670.9        | 361.4 | 0.112  |                        |
|           | 3                         | 29493.4        | 339.1 | 0.072 | 3                         | 27100.0        | 369.0 | 0.050 | 3                         | 35407.5        | 282.4 | 0.015  |                        |
|           | 4                         | 30940.6        | 323.2 | 0.018 | 4                         | 29183.2        | 342.7 | 0.019 | 4                         | 35878.2        | 278.7 | 0.093  |                        |
|           | 5                         | 31697.2        | 315.5 | 0.020 | 5                         | 29228.4        | 342.1 | 0.033 | 5                         | 37204.4        | 268.8 | 0.019  |                        |
|           | 6                         | 32682.3        | 306.0 | 0.015 | 6                         | 30094.5        | 332.3 | 0.005 | 6                         | 38951.1        | 256.7 | 0.002  |                        |
|           | 7                         | 33159.0        | 301.6 | 0.000 | 7                         | 31299.8        | 319.5 | 0.000 | 7                         | 39649.6        | 252.2 | 0.082  |                        |
|           | 8                         | 35657.3        | 280.4 | 0.152 | 8                         | 33728.9        | 296.5 | 0.166 | 8                         | 39971.2        | 250.2 | 0.135  |                        |
|           | 9                         | 36543.1        | 273.6 | 0.397 | 9                         | 35252.1        | 283.7 | 0.314 | 9                         | 40944.8        | 244.2 | 0.043  |                        |
|           | 10                        | 39264.1        | 254.7 | 0.003 | 10                        | 36654.7        | 272.8 | 0.213 | 10                        | 41163.4        | 242.9 | 0.823  |                        |



|           |    |         |       |       |    |         |       |       |    |         |       |       |                        |
|-----------|----|---------|-------|-------|----|---------|-------|-------|----|---------|-------|-------|------------------------|
| <b>3d</b> | 1  | 22801.3 | 438.6 | 0.111 | 1  | 21171.4 | 472.3 | 0.088 | 1  | 26222.8 | 381.3 | 0.073 | 340-440<br>(4.7/0.229) |
|           | 2  | 26585.6 | 376.1 | 0.010 | 2  | 25872.1 | 386.5 | 0.007 | 2  | 27733.0 | 360.6 | 0.128 |                        |
|           | 3  | 29151.3 | 343.0 | 0.086 | 3  | 27053.3 | 369.6 | 0.052 | 3  | 35422.3 | 282.3 | 0.015 |                        |
|           | 4  | 30922.2 | 323.4 | 0.021 | 4  | 29027.4 | 344.5 | 0.033 | 4  | 36060.1 | 277.3 | 0.103 |                        |
|           | 5  | 31299.0 | 319.5 | 0.015 | 5  | 29204.8 | 342.4 | 0.019 | 5  | 37241.4 | 268.5 | 0.025 |                        |
|           | 6  | 32642.0 | 306.4 | 0.011 | 6  | 30121.7 | 332.0 | 0.005 | 6  | 38741.2 | 258.1 | 0.004 |                        |
|           | 7  | 33152.0 | 301.6 | 0.000 | 7  | 31283.7 | 319.7 | 0.000 | 7  | 39421.1 | 253.7 | 0.097 |                        |
|           | 8  | 34508.5 | 289.8 | 0.150 | 8  | 32802.1 | 304.9 | 0.156 | 8  | 39510.4 | 253.1 | 0.400 |                        |
|           | 9  | 35660.9 | 280.4 | 0.538 | 9  | 34487.8 | 290.0 | 0.454 | 9  | 40460.8 | 247.2 | 0.029 |                        |
|           | 10 | 38062.3 | 262.7 | 0.014 | 10 | 36398.3 | 274.7 | 0.132 | 10 | 40830.4 | 244.9 | 0.727 |                        |
| <b>3e</b> | 1  | 22482.4 | 444.8 | 0.103 | 1  | 20663.5 | 483.9 | 0.08  | 1  | 26126.1 | 382.8 | 0.005 | 332-441<br>(5.0/0.210) |
|           | 2  | 26507.2 | 377.3 | 0.007 | 2  | 25802.2 | 387.6 | 0.005 | 2  | 27565.5 | 362.8 | 0.013 |                        |
|           | 3  | 28710.3 | 348.3 | 0.095 | 3  | 26493.5 | 377.5 | 0.072 | 3  | 35357.2 | 282.8 | 0.002 |                        |
|           | 4  | 30858.9 | 324.1 | 0.024 | 4  | 28523.0 | 350.6 | 0.017 | 4  | 35654.4 | 280.5 | 0.025 |                        |
|           | 5  | 31082.9 | 321.7 | 0.009 | 5  | 29144.0 | 343.1 | 0.019 | 5  | 37139.5 | 269.3 | 0.001 |                        |
|           | 6  | 32625.6 | 306.5 | 0.004 | 6  | 29929.0 | 334.1 | 0.006 | 6  | 38573.0 | 259.2 | 0.000 |                        |
|           | 7  | 33061.6 | 302.5 | 0.000 | 7  | 31210.9 | 320.4 | 0.000 | 7  | 39039.9 | 256.1 | 0.003 |                        |
|           | 8  | 33513.0 | 298.4 | 0.146 | 8  | 31542.8 | 317.0 | 0.143 | 8  | 39140.6 | 255.5 | 0.194 |                        |
|           | 9  | 35109.5 | 284.8 | 0.569 | 9  | 33776.3 | 296.1 | 0.485 | 9  | 39965.6 | 250.2 | 0.000 |                        |
|           | 10 | 37464.5 | 266.9 | 0.013 | 10 | 34567.8 | 289.3 | 0.005 | 10 | 40642.7 | 246.0 | 0.054 |                        |
| <b>3f</b> | 1  | 24860.3 | 402.2 | 0.133 | 1  | 23457.2 | 426.3 | 0.115 | 1  | 26413.5 | 378.6 | 0.027 | 300-412<br>(8.4/0.322) |
|           | 2  | 26462.8 | 377.9 | 0.030 | 2  | 25722.2 | 388.8 | 0.015 | 2  | 28530.8 | 350.5 | 0.186 |                        |
|           | 3  | 30585.7 | 327.0 | 0.005 | 3  | 28137.8 | 355.4 | 0.003 | 3  | 32843.7 | 304.5 | 0.069 |                        |
|           | 4  | 30787.3 | 324.8 | 0.008 | 4  | 29110.0 | 343.5 | 0.010 | 4  | 32850.8 | 304.4 | 0.005 |                        |
|           | 5  | 31212.8 | 320.4 | 0.347 | 5  | 29365.2 | 340.5 | 0.245 | 5  | 35495.4 | 281.7 | 0.008 |                        |
|           | 6  | 31870.7 | 313.8 | 0.018 | 6  | 30147.9 | 331.7 | 0.003 | 6  | 36062.5 | 277.3 | 0.037 |                        |
|           | 7  | 32644.1 | 306.3 | 0.037 | 7  | 30436.5 | 328.6 | 0.030 | 7  | 36229.1 | 276.0 | 0.017 |                        |
|           | 8  | 32800.0 | 304.9 | 0.066 | 8  | 31078.9 | 321.8 | 0.063 | 8  | 36717.0 | 272.4 | 0.522 |                        |
|           | 9  | 33023.2 | 302.8 | 0.000 | 9  | 31292.4 | 319.6 | 0.072 | 9  | 36753.3 | 272.1 | 0.019 |                        |
|           | 10 | 33147.2 | 301.7 | 0.000 | 10 | 31481.5 | 317.6 | 0.001 | 10 | 37408.4 | 267.3 | 0.096 |                        |
| <b>3g</b> | 1  | 25087.5 | 398.6 | 0.285 | 1  | 23945.8 | 417.6 | 0.274 | 1  | 26915.8 | 371.5 | 0.062 | 342-434<br>(6.9/0.290) |
|           | 2  | 26938.4 | 371.2 | 0.040 | 2  | 26187.2 | 381.9 | 0.023 | 2  | 28148.5 | 355.3 | 0.339 |                        |
|           | 3  | 30035.1 | 332.9 | 0.101 | 3  | 28312.4 | 353.2 | 0.088 | 3  | 34645.0 | 288.6 | 0.103 |                        |
|           | 4  | 31253.1 | 320.0 | 0.006 | 4  | 29675.1 | 337.0 | 0.006 | 4  | 35525.1 | 281.5 | 0.009 |                        |
|           | 5  | 33150.4 | 301.7 | 0.004 | 5  | 31396.4 | 318.5 | 0.004 | 5  | 37375.3 | 267.6 | 0.013 |                        |
|           | 6  | 37975.3 | 263.3 | 0.118 | 6  | 36422.0 | 274.6 | 0.038 | 6  | 40354.4 | 247.8 | 0.003 |                        |
|           | 7  | 39335.6 | 254.2 | 0.120 | 7  | 37712.7 | 265.2 | 0.116 | 7  | 43033.1 | 232.4 | 1.318 |                        |
|           | 8  | 40130.0 | 249.2 | 0.679 | 8  | 38447.5 | 260.1 | 0.604 | 8  | 44301.2 | 225.7 | 0.205 |                        |

|           |                                                                                                                                                                                                                                                         |                                                                                                                                                                                                                                                          |                                                                                                                                                                                                                                                         |                        |
|-----------|---------------------------------------------------------------------------------------------------------------------------------------------------------------------------------------------------------------------------------------------------------|----------------------------------------------------------------------------------------------------------------------------------------------------------------------------------------------------------------------------------------------------------|---------------------------------------------------------------------------------------------------------------------------------------------------------------------------------------------------------------------------------------------------------|------------------------|
|           | 9 41224.0 242.6 0.080<br>10 42771.2 233.8 0.065                                                                                                                                                                                                         | 9 39440.6 253.5 0.082<br>10 41956.4 238.3 0.096                                                                                                                                                                                                          | 9 45379.6 220.4 0.009<br>10 47928.2 208.6 0.001                                                                                                                                                                                                         |                        |
| <b>3h</b> | 1 20518.7 487.4 0.036<br>2 24790.7 403.4 0.077<br>3 26398.0 378.8 0.005<br>4 28518.3 350.7 0.021<br>5 30280.0 330.3 0.077<br>6 30648.4 326.3 0.032<br>7 31851.2 314.0 0.027<br>8 32693.2 305.9 0.075<br>9 32861.8 304.3 0.001<br>10 33461.9 298.8 0.016 | 1 18088.4 552.8 0.029<br>2 22179.1 450.9 0.066<br>3 25505.7 392.1 0.010<br>4 25693.3 389.2 0.009<br>5 26934.6 371.3 0.002<br>6 28656.1 349.0 0.056<br>7 29545.8 338.5 0.010<br>8 29981.7 333.5 0.008<br>9 31014.1 322.4 0.0147<br>10 31103.7 321.5 0.118 | 1 25596.6 390.7 0.044<br>2 27695.8 361.1 0.062<br>3 31906.9 313.4 0.161<br>4 34060.8 293.6 0.098<br>5 35997.8 277.8 0.011<br>6 36813.8 271.6 0.021<br>7 37037.5 270.0 0.054<br>8 38309.5 261.0 0.236<br>9 39657.3 252.2 0.389<br>10 39812.6 251.2 0.052 | 543 (-/-)              |
| <b>3i</b> | 1 21880.2 457.0 0.108<br>2 26572.1 376.3 0.007<br>3 27589.7 362.5 0.061<br>4 29969.8 333.7 0.051<br>5 30257.4 330.5 0.035<br>6 31397.0 318.5 0.005<br>7 32891.6 304.0 0.000<br>8 34927.1 286.3 0.151<br>9 35478.4 281.9 0.543<br>10 38006.6 263.1 0.021 | 1 20065.1 498.4 0.043<br>2 24984.1 400.3 0.001<br>3 25865.1 386.6 0.004<br>4 27619.5 362.1 0.004<br>5 27795.0 359.8 0.006<br>6 29547.5 338.4 0.003<br>7 31089.3 321.7 0.000<br>8 33230.5 300.9 0.014<br>9 34126.0 293.0 0.133<br>10 36334.1 275.2 0.001  | 1 25582.4 390.9 0.137<br>2 27219.7 367.4 0.049<br>3 34246.5 292.0 0.127<br>4 35171.7 284.3 0.021<br>5 36686.1 272.6 0.023<br>6 37220.4 268.7 0.002<br>7 37992.5 263.2 0.070<br>8 38988.6 256.5 0.583<br>9 40171.2 248.9 0.052<br>10 40494.5 246.9 0.480 | 360-456<br>(4.9/0.154) |
| <b>3j</b> | 1 19603.4 510.1 0.081<br>2 25547.7 391.4 0.118<br>3 26704.9 374.5 0.005<br>4 30233.2 330.8 0.007<br>5 30803.4 324.6 0.028<br>6 31777.7 314.7 0.004<br>7 33064.7 302.4 0.004<br>8 33355.9 299.8 0.174<br>9 33962.7 294.4 0.566<br>10 37059.6 269.8 0.009 | 1 17520.1 570.8 0.061<br>2 23348.6 428.3 0.103<br>3 26054.8 383.8 0.004<br>4 27499.9 363.6 0.003<br>5 28291.4 353.5 0.004<br>6 29561.4 338.3 0.026<br>7 31287.1 319.6 0.001<br>8 31595.5 316.5 0.171<br>9 32512.4 307.6 0.499<br>10 35660.4 280.4 0.019  | 1 24181.7 413.5 0.132<br>2 27225.6 367.3 0.017<br>3 32514.8 307.6 0.161<br>4 35142.8 284.6 0.042<br>5 36878.5 271.2 0.011<br>6 37682.1 265.4 0.112<br>7 37922.6 263.7 0.778<br>8 38435.1 260.2 0.028<br>9 39003.9 256.4 0.003<br>10 40257.6 248.4 0.230 | 396-487<br>(3.8/0.124) |
| <b>3k</b> | 1 20229.3 494.3 0.046<br>2 23161.7 431.7 0.002<br>3 26359.1 379.4 0.013<br>4 27512.8 363.5 0.131<br>5 30241.0 330.7 0.065<br>6 31186.1 320.7 0.005                                                                                                      | 1 17910.8 558.3 0.030<br>2 20442.8 489.2 0.001<br>3 25067.8 398.9 0.080<br>4 26070.4 383.6 0.037<br>5 27973.4 357.5 0.061<br>6 29540.4 338.5 0.006                                                                                                       | 1 25378.4 394.0 0.004<br>2 27135.6 368.5 0.004<br>3 31306.4 319.4 0.000<br>4 32983.8 303.2 0.004<br>5 35841.4 279.0 0.004<br>6 36119.7 276.9 0.012                                                                                                      | 326-448<br>(4.3/0.241) |

|           |                                                                                                                                                                                                                                                          |                                                                                                                                                                                                                                                         |                                                                                                                                                                                                                                                         |                        |
|-----------|----------------------------------------------------------------------------------------------------------------------------------------------------------------------------------------------------------------------------------------------------------|---------------------------------------------------------------------------------------------------------------------------------------------------------------------------------------------------------------------------------------------------------|---------------------------------------------------------------------------------------------------------------------------------------------------------------------------------------------------------------------------------------------------------|------------------------|
|           | 7 32910.4 303.9 0.000<br>8 33408.5 299.3 0.248<br>9 34939.9 286.2 0.041<br>10 35406.6 282.4 0.112                                                                                                                                                        | 7 31135.0 321.2 0.001<br>8 31749.0 315.0 0.198<br>9 32877.4 304.2 0.094<br>10 33451.5 298.9 0.048                                                                                                                                                       | 7 37264.2 268.4 0.006<br>8 37776.1 264.7 0.062<br>9 38481.5 259.9 0.004<br>10 40120.3 249.3 0.002                                                                                                                                                       |                        |
| <b>3l</b> | 1 21179.3 472.2 0.006<br>2 22545.6 443.5 0.0013<br>3 23441.0 426.6 0.096<br>4 26842.0 372.6 0.016<br>5 29812.2 335.4 0.076<br>6 31176.9 320.8 0.020<br>7 33148.0 301.7 0.000<br>8 33725.0 296.5 0.045<br>9 34886.0 286.6 0.001<br>10 34949.3 286.1 0.020 | 1 18172.7 550.3 0.002<br>2 20285.5 493.0 0.001<br>3 21432.9 466.6 0.078<br>4 26161.5 382.2 0.009<br>5 26933.8 371.3 0.064<br>6 29573.1 338.1 0.017<br>7 31302.8 319.5 0.000<br>8 31542.1 317.0 0.034<br>9 32608.8 306.7 0.000<br>10 32912.3 303.8 0.006 | 1 26128.6 382.7 0.080<br>2 27677.3 361.3 0.059<br>3 29457.9 339.5 0.058<br>4 31057.0 322.0 0.001<br>5 35567.8 281.2 0.016<br>6 35959.5 278.1 0.109<br>7 37309.4 268.0 0.004<br>8 38622.2 258.9 0.000<br>9 39506.6 253.1 0.092<br>10 39698.6 251.9 0.091 | 337-442<br>(4.4/0.120) |
| <b>3m</b> | 1 17171.2 582.4 0.041<br>2 21357.8 468.2 0.039<br>3 23026.6 434.3 0.040<br>4 24912.5 401.4 0.025<br>5 26551.3 376.6 0.004<br>6 30688.7 325.9 0.109<br>7 31638.1 316.1 0.290<br>8 31897.0 313.5 0.099<br>9 32927.6 303.7 0.000<br>10 34101.0 293.2 0.037  | 1 14807.5 675.3 0.027<br>2 18655.0 536.0 0.030<br>3 20460.8 488.7 0.035<br>4 22154.6 451.4 0.021<br>5 25771.0 388.0 0.003<br>6 29134.3 343.2 0.100<br>7 29756.1 336.1 0.216<br>8 30153.0 331.6 0.080<br>9 31104.0 321.5 0.000<br>10 32064.7 311.9 0.036 | 1 22973.3 435.3 0.077<br>2 26920.5 371.5 0.008<br>3 28848.6 346.6 0.059<br>4 30863.5 324.0 0.059<br>5 32370.4 308.9 0.066<br>6 34809.7 287.3 0.072<br>7 36005.5 277.7 0.402<br>8 36405.3 274.7 0.066<br>9 36933.4 270.8 0.006<br>10 37601.6 265.9 0.016 | -                      |
| <b>3n</b> | 1 19357.7 516.6 0.051<br>2 23528.0 425.0 0.142<br>3 26573.5 376.3 0.002<br>4 27078.8 369.3 0.011<br>5 28495.7 350.9 0.003<br>6 29154.7 343.0 0.041<br>7 29896.0 334.5 0.000<br>8 30428.9 328.6 0.070<br>9 31040.2 322.2 0.735<br>10 31619.4 316.3 0.018  | 1 17036.7 587.0 0.037<br>2 21033.4 475.4 0.125<br>3 23964.3 417.3 0.008<br>4 25753.4 388.3 0.005<br>5 25787.4 387.8 0.003<br>6 26165.7 382.2 0.007<br>7 26657.1 375.1 0.000<br>8 28324.9 353.0 0.095<br>9 29456.2 339.5 0.590<br>10 29702.0 336.7 0.006 | 1 24395.5 409.9 0.100<br>2 27134.2 368.5 0.011<br>3 31042.2 322.1 0.268<br>4 34377.8 290.9 0.086<br>5 34972.7 285.9 1.200<br>6 35629.1 280.7 0.021<br>7 36106.9 277.0 0.039<br>8 36227.2 276.0 0.006<br>9 36369.5 275.0 0.153<br>10 37286.9 268.2 0.002 | 400-491<br>(3.6/0.101) |
| <b>3o</b> | 1 20513.1 487.5 0.103<br>2 26445.0 378.1 0.007<br>3 27973.2 357.5 0.064<br>4 29556.8 338.3 0.010                                                                                                                                                         | 1 18650.0 536.2 0.083<br>2 25745.2 388.4 0.006<br>3 25815.2 387.4 0.047<br>4 27329.2 365.9 0.013                                                                                                                                                        | 1 24311.6 411.3 0.141<br>2 26966.5 370.8 0.023<br>3 34303.1 291.5 0.077<br>4 35131.9 284.6 0.029                                                                                                                                                        | 390-490<br>(3.1/0.110) |

|           |                        |                        |                        |                        |
|-----------|------------------------|------------------------|------------------------|------------------------|
|           | 5 29822.3 335.3 0.016  | 5 27571.9 362.7 0.008  | 5 36251.1 275.9 0.467  |                        |
|           | 6 31445.7 318.0 0.010  | 6 29707.4 336.6 0.014  | 6 36642.0 272.9 0.230  |                        |
|           | 7 33097.5 302.1 0.010  | 7 31323.3 319.3 0.006  | 7 37837.9 264.3 0.003  |                        |
|           | 8 33522.2 298.3 0.510  | 8 31969.5 312.8 0.457  | 8 38485.8 259.8 0.042  |                        |
|           | 9 35101.6 284.9 0.141  | 9 33335.9 300.0 0.130  | 9 39702.6 251.9 0.095  |                        |
|           | 10 37748.6 264.9 0.074 | 10 35806.5 279.3 0.092 | 10 40530.9 246.7 0.020 |                        |
| <b>3p</b> | 1 23126.3 432.4 0.150  | 1 21610.2 462.7 0.126  | 1 26278.8 380.5 0.089  | 345-460<br>(4.3/0.161) |
|           | 2 25768.7 388.1 0.033  | 2 23148.9 432.0 0.026  | 2 27858.9 359.0 0.168  |                        |
|           | 3 26724.3 374.2 0.016  | 3 25609.7 390.5 0.001  | 3 33021.9 302.8 0.058  |                        |
|           | 4 27998.5 357.2 0.002  | 4 26026.0 384.2 0.012  | 4 35442.4 282.1 0.010  |                        |
|           | 5 31266.3 319.8 0.011  | 5 29516.7 338.8 0.061  | 5 36786.4 271.8 0.005  |                        |
|           | 6 31500.9 317.5 0.067  | 6 29635.4 337.4 0.011  | 6 37286.6 268.2 0.006  |                        |
|           | 7 33105.9 302.1 0.000  | 7 31303.7 319.5 0.000  | 7 37806.8 264.5 0.045  |                        |
|           | 8 36040.2 277.5 0.177  | 8 34291.0 291.6 0.187  | 8 40480.0 247.0 0.010  |                        |
|           | 9 37567.8 266.2 0.275  | 9 36175.9 276.4 0.116  | 9 40793.3 245.1 0.093  |                        |
|           | 10 38695.1 258.4 0.019 | 10 36750.2 272.1 0.019 | 10 41984.8 238.2 0.999 |                        |

\*Oscillator strength ( $f$ ) is calculated from experimental spectra using the equation  $f = 4.32 \cdot 10^{-9} \int \epsilon(v) dv$

**Table S5.** Cartesian coordinates for the optimized geometry of compounds **3**

| Nº        | B3LYP 6-311G*    |                   |                   | PBE0 def2-TZVP    |                  |                   |                   |                   |
|-----------|------------------|-------------------|-------------------|-------------------|------------------|-------------------|-------------------|-------------------|
| <b>3a</b> | N                | 0.52758172738653  | 2.10257639154243  | -1.08150314836982 | N                | 0.52393218688367  | 2.09306188799392  | -1.07146372972579 |
|           | C                | 0.92505403880967  | 3.14988339047685  | -1.91928582728369 | C                | 0.92435912353126  | 3.13203992742830  | -1.89428906710937 |
|           | N                | 0.36845163260463  | 4.40125626543629  | -1.89404237799093 | N                | 0.37041591476820  | 4.37652605475990  | -1.87608610048548 |
|           | N                | -0.57611242470466 | 4.64916877227251  | -1.06560846063308 | N                | -0.57342099619045 | 4.61929543759397  | -1.06317411542544 |
|           | C                | -1.08068500208908 | 3.63089173087987  | -0.30104074331899 | C                | -1.07745793221039 | 3.60182781913273  | -0.31039382369985 |
|           | N                | -2.12785215174290 | 3.68663896427405  | 0.49619433117368  | N                | -2.12467001397784 | 3.65669492466438  | 0.47774187601316  |
|           | N                | -2.38444580287634 | 2.42865855996130  | 0.91959670767369  | N                | -2.37642352680832 | 2.41292107501016  | 0.89663584926434  |
|           | C                | -1.51204441644747 | 1.57207620020220  | 0.39135419367015  | C                | -1.50152555131807 | 1.56190834561814  | 0.37875554719545  |
|           | C                | -1.60464394429117 | 0.12290033139690  | 0.54380706948809  | C                | -1.60299839597440 | 0.11844878189125  | 0.53468604976860  |
|           | C                | -1.97407213308527 | -0.39757472361588 | 1.78930840191844  | C                | -1.97877380462745 | -0.39050650444926 | 1.77579461035205  |
|           | C                | -2.08837072944459 | -1.77169351285828 | 1.95919532952854  | C                | -2.11982079703866 | -1.75598368777412 | 1.94670824577863  |
|           | C                | -1.84345933572720 | -2.63137334704231 | 0.88983451348713  | C                | -1.89420727883386 | -2.61765690256521 | 0.88270698939614  |
|           | C                | -1.50577073810014 | -2.11363189566603 | -0.35902648738056 | C                | -1.54679504120231 | -2.11058487152923 | -0.36097006685552 |
|           | C                | -1.39450631461912 | -0.74091643379491 | -0.53632016934778 | C                | -1.40919336693840 | -0.74590709197293 | -0.53928893510313 |
|           | N                | -0.63044757304774 | 2.30817456313940  | -0.36801671276359 | N                | -0.62660261272684 | 2.29420530719517  | -0.37197561729020 |
|           | N                | 1.98347135686896  | 2.77055748673403  | -2.60587785028037 | N                | 1.98329417560855  | 2.75736445804753  | -2.57219240638726 |
|           | N                | 2.29924865047346  | 1.51775886680098  | -2.20771918441086 | N                | 2.29181358304205  | 1.51766721020125  | -2.18013236387223 |
|           | C                | 1.45270936567261  | 1.10005489858829  | -1.26814554953312 | C                | 1.44140655974685  | 1.09814533277903  | -1.25344700661532 |
| C         | 1.60596589146043 | -0.15359861378683 | -0.53579106191495 | C                 | 1.60320280965296 | -0.15195752165042 | -0.52672428017313 |                   |
| C         | 1.40931912220336 | -0.22036207597311 | 0.84759141185707  | C                 | 1.42178701083593 | -0.22180367388635 | 0.85179504343887  |                   |
| C         | 1.57885989686361 | -1.42556669746260 | 1.51586971236299  | C                 | 1.61881595274736 | -1.41931126329363 | 1.51492686649431  |                   |

|           |   |                   |                   |                   |   |                   |                   |                   |
|-----------|---|-------------------|-------------------|-------------------|---|-------------------|-------------------|-------------------|
|           | C | 1.96195285913188  | -2.56600786507963 | 0.81275227871463  | C | 2.01197044469465  | -2.54766121694858 | 0.81001718286210  |
|           | C | 2.19242078861710  | -2.49512578950306 | -0.55993731450602 | C | 2.22336798326175  | -2.47314664702387 | -0.55931688325414 |
|           | C | 2.01953788579436  | -1.29313971919863 | -1.23505564627664 | C | 2.02364630182702  | -1.27920761076223 | -1.22877789831022 |
|           | H | -2.16465627988218 | 0.28322631005348  | 2.61015566029240  | H | -2.15419395799404 | 0.29518631640981  | 2.59530967528979  |
|           | H | -2.36596195390578 | -2.17277578438141 | 2.92792437271904  | H | -2.40412823959855 | -2.14997849275752 | 2.91504379688061  |
|           | H | -1.92359976615347 | -3.70446100953557 | 1.02668488819340  | H | -1.99706765483323 | -3.68748094004210 | 1.02047260541077  |
|           | H | -1.32687790829193 | -2.77928155271428 | -1.19555946658567 | H | -1.38420224513561 | -2.77998210239484 | -1.19659360700720 |
|           | H | -1.14696949998128 | -0.34246027867467 | -1.51367837874947 | H | -1.15588722944956 | -0.35361435920674 | -1.51716205556995 |
|           | H | 1.12533783357443  | 0.66702190504066  | 1.40163969925876  | H | 1.13069669665348  | 0.66053387100765  | 1.40939389193639  |
|           | H | 1.40959256435916  | -1.47476540072091 | 2.58533357921493  | H | 1.46595360249146  | -1.47105143669225 | 2.58578991725923  |
|           | H | 2.08842228109079  | -3.50741905340454 | 1.33658343748750  | H | 2.16185936934160  | -3.48555847575364 | 1.33149239416145  |
|           | H | 2.50441727494637  | -3.37878330627070 | -1.10598880431583 | H | 2.54280659244842  | -3.35049731233160 | -1.10881527613158 |
|           | H | 2.19793280453298  | -1.22200757711586 | -2.30122840337909 | H | 2.18784033732280  | -1.20403663869865 | -2.29646730848607 |
|           | F | -1.14302042981530 | 4.21445482677717  | -0.45261335319315 | F | -1.34947507618012 | 4.21877011276906  | -0.37209449309551 |
|           | C | -1.28297778038124 | 2.94557354800016  | -0.08494946759352 | C | -1.41278066703434 | 2.94624352534055  | -0.04145269243823 |
|           | C | -2.27596946899612 | 2.15810896843025  | -0.65806886900298 | C | -2.36726948448105 | 2.12562597795343  | -0.62358992533953 |
|           | F | -3.09571699708371 | 2.68169772005759  | -1.56570774160434 | F | -3.21268927143688 | 2.62353235181616  | -1.50555825749369 |
|           | C | -2.38159492536419 | 0.81747019896144  | -0.30591692847738 | C | -2.41352409471199 | -0.78314253721752 | -0.28497620811335 |
|           | F | -3.30825379714329 | 0.07710517286912  | -0.90243650001091 | F | -3.31162632720406 | 0.01915839797578  | -0.87039016930890 |
|           | C | -0.40714341828318 | 2.39891049637792  | 0.84829212759018  | C | -0.51171917974133 | 2.42992731811932  | 0.87927196604942  |
|           | F | 0.57380745066388  | 3.14074227514469  | 1.36330473577681  | F | 0.40420155775731  | 3.21238480822044  | 1.42124128237413  |
|           | C | -0.54000809124363 | 1.06853176020836  | 1.20366421976275  | C | -0.58179041789937 | 1.09206837944349  | 1.21232385702972  |
|           | F | 0.31874765782215  | 0.54785427314640  | 2.09300102060498  | F | 0.27401892254323  | 0.60779043579228  | 2.10507762192165  |
|           | C | -1.50477583227974 | 0.24690674968689  | 0.62135930674579  | C | -1.51448245547765 | 0.24195995678664  | 0.63081334988620  |
|           | C | -1.63675763032788 | -1.15099977404834 | 1.02021680256807  | C | -1.62220815588071 | -1.14974023399575 | 1.04390984420991  |
|           | N | -2.76516351476114 | -1.68963278491584 | 1.46465846707816  | N | -2.73631921862891 | -1.67957383917664 | 1.51856948952940  |
|           | N | -2.54989340649932 | -2.96449137848097 | 1.85431281661143  | N | -2.51817413078489 | -2.93606584052677 | 1.91223151236536  |
|           | C | -1.27495249175039 | -3.23167889974611 | 1.65444132290044  | C | -1.25365763029708 | -3.20603652580429 | 1.68739782499683  |
|           | N | -0.61234868095135 | -4.37845626696144 | 2.00435053593875  | N | -0.59589152670498 | -4.34976083529539 | 2.02556096524876  |
|           | N | 0.65152928746586  | -4.45046392875799 | 1.82484620579235  | N | 0.65067311265194  | -4.43032832822373 | 1.81084731324650  |
|           | N | -0.65379385846039 | -2.10876660277099 | 1.10152902093473  | N | -0.64836315855907 | -2.10143045175928 | 1.11488444238514  |
|           | N | 0.67325866974714  | -2.23871924342440 | 0.78735320666085  | N | 0.65738678110524  | -2.23596789460422 | 0.77397823905789  |
|           | C | 1.30418082504624  | -3.40666722039635 | 1.22395705924760  | C | 1.28508809094456  | -3.39648926810151 | 1.19090724259209  |
|           | N | 2.57629847599618  | -3.36197952281641 | 0.88291704816725  | N | 2.54511863981388  | -3.35916951984350 | 0.82639196544359  |
|           | N | 2.77995942480995  | -2.20525917581947 | 0.21686504657794  | N | 2.73873291923390  | -2.21489875337680 | 0.16799478565443  |
|           | C | 1.64679613375618  | -1.51911867435245 | 0.13656949832715  | C | 1.61372917593884  | -1.52248694663790 | 0.11352603266571  |
|           | C | 1.50300319414545  | -0.27186852806208 | -0.60841039810344 | C | 1.49395737078143  | -0.26839128826981 | -0.61801057492523 |
|           | C | 0.54444314385863  | -0.14859628194713 | -1.61371144660622 | C | 0.57824357670769  | -0.11845335966640 | -1.65256294795298 |
|           | F | -0.29466959003013 | -1.16834671005657 | -1.84686079880985 | F | -0.26757358670244 | -1.10570393836726 | -1.92111324772015 |
|           | C | 0.40460153570542  | 1.01715516445722  | -2.34602368869148 | C | 0.51928309935608  | 1.03544430558877  | -2.40981794398244 |
|           | F | -0.56302337107094 | 1.13873837964111  | -3.25540699270280 | F | -0.37378932163127 | 1.16645756457548  | -3.37441270388634 |
|           | C | 1.26456202925285  | 2.08235648831337  | -2.09704816455295 | C | 1.41023376802807  | 2.06564527291341  | -2.14326407467494 |
|           | F | 1.12083453495638  | 3.21332099558460  | -2.77812881390591 | F | 1.36109726753736  | 3.17380170095182  | -2.85229958869748 |
|           | C | 2.24529317486192  | 1.97938770118769  | -1.11650166391836 | C | 2.34243477910193  | 1.93868209181016  | -1.12468044014474 |
|           | F | 3.03908310767121  | 3.01719524289566  | -0.86661992340861 | F | 3.17258734073131  | 2.93112126670795  | -0.86989894183659 |
|           | C | 2.36273738443221  | 0.80606424745451  | -0.38040446765806 | C | 2.38189238117432  | 0.77593592598051  | -0.37294431240170 |
|           | F | 3.28072725425028  | 0.74327078336240  | 0.57697077695473  | F | 3.26245491994904  | 0.68660509368650  | 0.60193878735508  |
| <b>3c</b> | F | 1.42573714040583  | 4.21239405552611  | -0.38463322461236 | F | 1.58959342067614  | 4.18683701008731  | -0.42901184679475 |

|  |    |                   |                   |                   |    |                    |                   |                   |
|--|----|-------------------|-------------------|-------------------|----|--------------------|-------------------|-------------------|
|  | C  | 1.51186002277366  | 2.89643020045206  | -0.11965380570877 | C  | 1.61316435276809   | 2.88395898345131  | -0.15021105640383 |
|  | C  | 1.90718981160859  | 2.48851944928284  | 1.14653198474817  | C  | 1.98473505415152   | 2.47668536811718  | 1.11776694566028  |
|  | C  | 1.96682651372606  | 1.12878379164533  | 1.42047339875004  | C  | 1.99264024007709   | 1.12442898232770  | 1.40345377010361  |
|  | C  | 1.20629503607580  | 1.99060210071424  | -1.12590670508078 | C  | 1.27333560435374   | 1.98365173625726  | -1.14303919118682 |
|  | C  | 1.27193025570519  | 0.63415302173272  | -0.84379529903807 | C  | 1.28844645450452   | 0.63429379558342  | -0.84648808515286 |
|  | C  | 1.62385071405077  | 0.19314958617779  | 0.43699889528728  | C  | 1.62430853078918   | 0.19575216810272  | 0.43198803991423  |
|  | C  | 1.70043237872952  | -1.22675940470259 | 0.76424023495492  | C  | 1.68072827584028   | -1.21821295576516 | 0.76624267653247  |
|  | N  | 2.69221716961900  | -1.77204361170574 | 1.46538187603281  | N  | 2.66473782447214   | -1.76214918776352 | 1.46868004820458  |
|  | N  | 2.55970359524076  | -3.11675089130002 | 1.50461855517267  | N  | 2.53326980489637   | -3.09143089031105 | 1.50710220005874  |
|  | C  | 1.47281335326303  | -3.42828676350446 | 0.82897442857428  | C  | 1.45467450144467   | -3.40007444608570 | 0.82720355690622  |
|  | N  | 1.04937290983956  | -4.68631246523041 | 0.49091299109628  | N  | 1.03854292804252   | -4.65227464309647 | 0.48841619312150  |
|  | N  | 0.04110165910904  | -4.81988204159797 | -0.28675432602418 | N  | 0.04626125594128   | -4.78310649538055 | -0.29169443158125 |
|  | N  | 0.86974172793173  | -2.25186950039232 | 0.36979568098039  | N  | 0.85960220753748   | -2.23550808697176 | 0.37154335758926  |
|  | N  | -0.33785549009442 | -2.40562892740600 | -0.27172813366908 | N  | -0.33048643070377  | -2.38638863352235 | -0.27201825865058 |
|  | C  | -0.65484043505131 | -3.70671365059838 | -0.67769404953035 | C  | -0.64134460048093  | -3.67277278967151 | -0.68003219006244 |
|  | N  | -1.77888747889654 | -3.67913756386380 | -1.36370592710189 | N  | -1.75556480285177  | -3.64418110731100 | -1.37172690903319 |
|  | N  | -2.21277050172811 | -2.39894538005963 | -1.38351528020320 | N  | -2.18496111928934  | -2.37889285410821 | -1.38829067340251 |
|  | C  | -1.37593981503490 | -1.61363151296037 | -0.70860303946526 | C  | -1.256675127175058 | -1.59843846654701 | -0.70806685162703 |
|  | C  | -1.62453183534324 | -0.20160959317353 | -0.43947587066234 | C  | -1.62494122072260  | -0.19660791329493 | -0.43087819993703 |
|  | C  | -1.38808983948576 | 0.35706106183487  | 0.82184289405263  | C  | -1.40796762759796  | 0.35745368680067  | 0.82834788506786  |
|  | C  | -1.63146746375173 | 1.70320321287999  | 1.05007495909590  | C  | -1.70091141149697  | 1.68605227878007  | 1.06892110057690  |
|  | C  | -2.12685442929183 | 2.47631346294757  | 0.00936523765392  | C  | -2.22642973967945  | 2.44519203493937  | 0.03969256259625  |
|  | F  | -2.34085044677104 | 3.78690516376091  | 0.22152105256409  | F  | -2.49957544028343  | 3.72986659384743  | 0.26447277118198  |
|  | C  | -2.41271668461556 | 1.94092821590189  | -1.23870567975394 | C  | -2.48472585068765  | 1.91412819954685  | -1.21055094579334 |
|  | C  | -2.16378165715525 | 0.59292231294943  | -1.45835509000458 | C  | -2.18532102629154  | 0.58447918978639  | -1.43982531723106 |
|  | H  | 2.15382047758128  | 3.23026131964856  | 1.89660568785462  | H  | 2.25798516259171   | 3.21504470165199  | 1.86058122706404  |
|  | H  | 2.27202690149034  | 0.77944664453775  | 2.39914688093826  | H  | 2.28267431729874   | 0.77326919622701  | 2.38570224106878  |
|  | H  | 0.92130169522635  | 2.35287495649225  | -2.10560286968467 | H  | 1.00830635610797   | 2.34436150954588  | -2.12821073031066 |
|  | H  | 1.04647215628227  | -0.08155372158219 | -1.62554877178236 | H  | 1.04137146588072   | -0.08042452391785 | -1.62220206618484 |
|  | H  | -1.01220286530703 | -0.25784595662339 | 1.63112122671883  | H  | -1.01289590403471  | -0.25061200078288 | 1.63327264993935  |
|  | H  | -1.44043128706098 | 2.15845506939304  | 2.01363376145326  | H  | -1.53258016808715  | 2.13667260973538  | 2.03815507288868  |
|  | H  | -2.81475067217771 | 2.57878723096699  | -2.01657197430375 | H  | -2.91024090728634  | 2.54141976295011  | -1.98321384699348 |
|  | H  | -2.37692261689335 | 0.14538012785648  | -2.42128969930279 | H  | -2.37988023612998  | 0.13712718679188  | -2.40638169812905 |
|  | CI | 1.54031147856758  | 2.69035077239037  | 3.55098194146154  | CI | 1.64098381223583   | 2.61176302114511  | 3.57678834850234  |
|  | C  | 1.38484418779382  | 1.29886026032604  | 2.50402558850149  | C  | 1.44847245904713   | 1.26463207828300  | 2.52478456364352  |
|  | C  | 0.95738692763727  | 0.08447751392479  | 3.03439381367128  | C  | 1.00828142638914   | 0.05248985257341  | 3.03685554731918  |
|  | C  | 0.80744623755908  | -1.00831733741288 | 2.19158473736702  | C  | 0.82992686747176   | -1.01888472906277 | 2.18272981052895  |
|  | C  | 1.69537671295788  | 1.42598553473715  | 1.15299283076810  | C  | 1.73832044359465   | 1.40665823562233  | 1.17533771583138  |
|  | C  | 1.54426788229697  | 0.32892827586281  | 0.31804971274473  | C  | 1.55722683208502   | 0.33060270570769  | 0.32849404645091  |
|  | C  | 1.07208157938761  | -0.88677546492667 | 0.82300191501706  | C  | 1.07815707596313   | -0.88074091327539 | 0.81916624294007  |
|  | C  | 0.90015694882932  | -2.05551859843838 | -0.03365906084103 | C  | 0.89969874910221   | -2.03906691232251 | -0.04184845057312 |
|  | N  | 1.28503440543390  | -3.28462861704668 | 0.30327170406608  | N  | 1.29424777905319   | -3.26026424716124 | 0.28944449470515  |
|  | N  | 1.11993935259285  | -4.13236355705967 | -0.73670308977377 | N  | 1.13320159466668   | -4.09850169577933 | -0.73862215888241 |
|  | C  | 0.61944542222781  | -3.43925603581472 | -1.73884450387183 | C  | 0.62579009635931   | -3.40965774858326 | -1.73308922408505 |
|  | N  | 0.43652420005169  | -3.87069736877965 | -3.02637599777402 | N  | 0.43846501700398   | -3.84435493932338 | -3.01090823306995 |
|  | N  | 0.06069039235838  | -3.03402795444736 | -3.91949726951812 | N  | 0.05426327136527   | -3.01745288062529 | -3.89344395067851 |
|  | N  | 0.42653928218317  | -2.11674876826829 | -1.32486735195549 | N  | 0.42618720457638   | -2.10254612723042 | -1.32102792092199 |
|  | N  | -0.18861259953851 | -1.28526440632496 | -2.23163651560302 | N  | -0.18994424332907  | -1.28194243689318 | -2.21567935699923 |

3d

|    |                   |                   |                   |                   |                   |                   |                   |                   |
|----|-------------------|-------------------|-------------------|-------------------|-------------------|-------------------|-------------------|-------------------|
|    | C                 | -0.25011894163703 | -1.75253022884709 | -3.54880911644830 | C                 | -0.25959383846690 | -1.74613164764061 | -3.51833266832503 |
|    | N                 | -0.76841679759586 | -0.81266531485292 | -4.31249231681916 | N                 | -0.78194448183031 | -0.81271970783411 | -4.27778844803766 |
|    | N                 | -1.07217356140132 | 0.23729629142019  | -3.51709303596956 | N                 | -1.07884159282281 | 0.22527041145510  | -3.49058719249696 |
|    | C                 | -0.75751821007125 | -0.03169612142243 | -2.25191928986074 | C                 | -0.75541481151327 | -0.03891445065127 | -2.23270849893133 |
|    | C                 | -1.07448622888382 | 0.84677033418478  | -1.13091933855155 | C                 | -1.07910562877605 | 0.84317740378262  | -1.12296352953865 |
|    | C                 | -0.89354934186729 | 2.22585705479407  | -1.28316512899351 | C                 | -0.91168315459489 | 2.21545235552236  | -1.29267849885487 |
|    | C                 | -1.17746998785647 | 3.09007958128201  | -0.23468893574263 | C                 | -1.22505323588435 | 3.08940398644860  | -0.26935808053003 |
|    | C                 | -1.65468238237031 | 2.56931212426092  | 0.96515151386543  | C                 | -1.71916592260629 | 2.58690064291988  | 0.92601128237258  |
|    | Cl                | -1.97874998154045 | 3.64540480695032  | 2.30440958358126  | Cl                | -2.08073196213980 | 3.66443494651917  | 2.21738571469959  |
|    | C                 | -1.88432888798256 | 1.20497281504274  | 1.11859988695750  | C                 | -1.92970545526423 | 1.22608910264420  | 1.09568304986410  |
|    | C                 | -1.59955315931412 | 0.34840060890124  | 0.06562784205664  | C                 | -1.61424696066102 | 0.35937214353071  | 0.06748460571496  |
|    | H                 | 0.73903919918135  | 0.00139731653477  | 4.09170619122379  | H                 | 0.80295123053478  | -0.04262556536073 | 4.09505262936166  |
|    | H                 | 0.47583265234047  | -1.96149737527159 | 2.58496403122966  | H                 | 0.48868834043657  | -1.97293578096741 | 2.56445444113980  |
|    | H                 | 2.04464237575850  | 2.37281475777207  | 0.76234267979027  | H                 | 2.09963579764222  | 2.35351030972293  | 0.79691766938584  |
|    | H                 | 1.79623980019780  | 0.42493978032015  | -0.73165362707877 | H                 | 1.79561366878848  | 0.43968689339277  | -0.72276774331470 |
|    | H                 | -0.52014751918800 | 2.61069167230672  | -2.22429952429875 | H                 | -0.52558820746752 | 2.58855819183338  | -2.23301196328791 |
|    | H                 | -1.02468229547603 | 4.15683365593383  | -0.34034542198732 | H                 | -1.08349869125921 | 4.15557348282712  | -0.38884523766593 |
|    | H                 | -2.27475650109852 | 0.82127920068471  | 2.05211578989871  | H                 | -2.33543204653742 | 0.85473453921266  | 2.02721566938031  |
|    | H                 | -1.78645264153393 | -0.71286520871639 | 0.18154976288702  | H                 | -1.79006143316257 | -0.70177052043210 | 0.19765532435297  |
| 3e | Br                | -2.48613761484007 | -2.07271352135039 | 3.86623453848950  | Br                | -2.55980935393431 | -2.02632290104491 | 3.83805086047011  |
|    | C                 | -2.09651057002645 | -0.97154001933694 | 2.35881190482844  | C                 | -2.14332355060372 | -0.95424632313168 | 2.35001717660749  |
|    | C                 | -2.06791951043795 | 0.41330247965326  | 2.50734563004126  | C                 | -2.09926329776028 | 0.42532005772143  | 2.48893805705999  |
|    | C                 | -1.75977604839824 | 1.20639433308180  | 1.40988685225010  | C                 | -1.76673924424077 | 1.20417706968284  | 1.39616569158829  |
|    | C                 | -1.85247844784361 | -1.56991429069552 | 1.12554491363540  | C                 | -1.88931535060404 | -1.55987827879178 | 1.12868509595850  |
|    | C                 | -1.54844084898059 | -0.76943133591860 | 0.03399019182516  | C                 | -1.56015777120606 | -0.77352303234573 | 0.04138548470655  |
|    | C                 | -1.47124266156935 | 0.62004675177020  | 0.17271456722417  | C                 | -1.46975194543393 | 0.60937036439790  | 0.17239404027391  |
|    | C                 | -1.14569105774265 | 1.48095118846932  | -0.95885774053232 | C                 | -1.13765469504424 | 1.46090160668391  | -0.95815613546098 |
|    | N                 | -1.77590125765612 | 2.62034189025599  | -1.23705497813696 | N                 | -1.77310070647008 | 2.58959248739718  | -1.23911679221592 |
|    | N                 | -1.34964858704450 | 3.11844321204060  | -2.41973447529412 | N                 | -1.35562747111107 | 3.08223588672199  | -2.40932078780655 |
|    | C                 | -0.43689913130967 | 2.29385167043237  | -2.89223004670807 | C                 | -0.44195749672480 | 2.26490574102086  | -2.87727381880625 |
|    | N                 | 0.14252315839902  | 2.32944237140966  | -4.13349266491519 | N                 | 0.13541543627029  | 2.30896048018329  | -4.11074352429860 |
|    | N                 | 0.90999730322636  | 1.37002240789482  | -4.49397694411690 | N                 | 0.90641538689074  | 1.36532948838909  | -4.46506269577355 |
|    | N                 | -0.24550696015220 | 1.25583061384116  | -1.97519303645011 | N                 | -0.24471375769966 | 1.24086809564260  | -1.96727894121919 |
|    | N                 | 0.75504661616355  | 0.36192317091488  | -2.27498366015357 | N                 | 0.75272368785586  | 0.36314095185081  | -2.26178834428106 |
|    | C                 | 1.22255804634294  | 0.38623072914995  | -3.59272836957193 | C                 | 1.22207791939389  | 0.39330440802784  | -3.56364783435364 |
|    | N                 | 2.09449551047876  | -0.58814822160999 | -3.75487932570871 | N                 | 2.09857042124537  | -0.56985972185078 | -3.72426743084277 |
|    | N                 | 2.22631216411755  | -1.21872757742839 | -2.56651898800406 | N                 | 2.22821988345164  | -1.19400843171400 | -2.55004449338336 |
|    | C                 | 1.45045786062078  | -0.64683136956559 | -1.64749199325402 | C                 | 1.44634206808793  | -0.63392949025957 | -1.63766237362668 |
|    | C                 | 1.46697476015586  | -1.00533168331229 | -0.23289847807433 | C                 | 1.46990338520120  | -0.99769391213401 | -0.22964799296491 |
|    | C                 | 1.56812621576091  | -2.35607464209814 | 0.11845378070721  | C                 | 1.58019502382740  | -2.34386278456948 | 0.11024399532471  |
|    | C                 | 1.59209105955371  | -2.73447105835984 | 1.45416033393309  | C                 | 1.62543187285305  | -2.72821095656638 | 1.43717728515778  |
|    | C                 | 1.52611845483433  | -1.75324000898532 | 2.44058957423350  | C                 | 1.57077295262260  | -1.75788083166218 | 2.42695999703377  |
|    | Br                | 1.54022636030570  | -2.26613200834918 | 4.27756898644059  | Br                | 1.60379906230842  | -2.27581444953252 | 4.23458826860735  |
|    | C                 | 1.46182495412884  | -0.40201629640208 | 2.10967458559586  | C                 | 1.49884326889397  | -0.41060023338568 | 2.10543225696045  |
|    | C                 | 1.44060822518358  | -0.03289457958428 | 0.77205616071998  | C                 | 1.45530312008235  | -0.03522340051160 | 0.77607831975063  |
|    | H                 | -2.27751151053824 | 0.86424943418468  | 3.46908311157446  | H                 | -2.31664455491369 | 0.88301129885608  | 3.44501847580263  |
|    | H                 | -1.73204715358177 | 2.28519659914520  | 1.50461292910081  | H                 | -1.72630018150003 | 2.28272256671808  | 1.48427989886666  |
| H  | -1.89617527024254 | -2.64606488437030 | 1.02089265415418  | H                 | -1.94819664952214 | -2.63560623245442 | 1.03121820910154  |                   |

|    |                   |                   |                   |                   |                   |                   |                   |                   |
|----|-------------------|-------------------|-------------------|-------------------|-------------------|-------------------|-------------------|-------------------|
|    | H                 | -1.37080279423330 | -1.23478019584805 | -0.92864470716693 | H                 | -1.37547454905711 | -1.24680498721088 | -0.91563618220504 |
|    | H                 | 1.62264506108141  | -3.10433713639108 | -0.66288033090267 | H                 | 1.62433101605521  | -3.08653043906548 | -0.67654156403194 |
|    | H                 | 1.65795901302883  | -3.77996922776856 | 1.72760882906652  | H                 | 1.69784400311362  | -3.77413476718658 | 1.70480927622844  |
|    | H                 | 1.42914685988191  | 0.35098721243810  | 2.88630533337072  | H                 | 1.47795862954192  | 0.33616549675939  | 2.88789429518613  |
|    | H                 | 1.40547780133318  | 1.01970399269255  | 0.51573086179894  | H                 | 1.41378343813048  | 1.01842517336437  | 0.52655222658550  |
| 3f | O                 | 2.27411428996769  | -4.12965531395448 | 1.73944627848110  | O                 | 2.38504225354277  | -4.09277504445971 | 1.69814042432760  |
|    | N                 | 1.67865458878956  | -3.12352752138104 | 2.08451845905572  | N                 | 1.81988770308769  | -3.09475271594610 | 2.07894640675712  |
|    | C                 | 1.71464459449472  | -1.96032667035790 | 1.17386663144570  | C                 | 1.80495951097402  | -1.93883477209264 | 1.17479240512038  |
|    | C                 | 2.06994427520122  | -2.15264479033993 | -0.15497402118477 | C                 | 2.13920590209614  | -2.12400665105866 | -0.15433996422290 |
|    | C                 | 2.02219000518913  | -1.06776281522399 | -1.01914035723424 | C                 | 2.05064560825838  | -1.04644703963173 | -1.01436130371232 |
|    | C                 | 1.37511203741146  | -0.71156189670217 | 1.67922247710261  | C                 | 1.44116043010165  | -0.70477634385504 | 1.68277040266678  |
|    | C                 | 1.34804116847354  | 0.37066739851592  | 0.81402046355022  | C                 | 1.37306422747053  | 0.37103091466451  | 0.82015151538329  |
|    | C                 | 1.62724473860367  | 0.19004395430496  | -0.54571380621459 | C                 | 1.63676933365335  | 0.19620085160054  | -0.53678487268857 |
|    | C                 | 1.55692452555822  | 1.30296837800030  | -1.48918528701642 | C                 | 1.54836170666111  | 1.30361240075307  | -1.47775091154581 |
|    | N                 | 2.47597459910321  | 1.53916039945533  | -2.42141833361801 | N                 | 2.46296322469611  | 1.54257579087055  | -2.40559465571292 |
|    | N                 | 2.21658383394638  | 2.70360253418794  | -3.05493053732886 | N                 | 2.20259900018723  | 2.69242043279800  | -3.03242796608069 |
|    | C                 | 1.11988214631853  | 3.20750373526491  | -2.52653446337350 | C                 | 1.10820869182525  | 3.18926408405628  | -2.50583376486720 |
|    | N                 | 0.57863545065785  | 4.44033785339835  | -2.77947961368851 | N                 | 0.56757426592142  | 4.41382440583508  | -2.76088098551952 |
|    | N                 | -0.42811505578012 | 4.83417511305659  | -2.09510236941492 | N                 | -0.43030604266290 | 4.80095222833325  | -2.08036986766820 |
|    | N                 | 0.64260487940260  | 2.33155508570155  | -1.54525055604825 | N                 | 0.63818671100072  | 2.32020697531692  | -1.53554164318811 |
|    | N                 | -0.56672204149074 | 2.66445968069065  | -0.97936043479471 | N                 | -0.55775813513084 | 2.64585315433510  | -0.97265782884758 |
|    | C                 | -1.00598649105952 | 3.97482079213743  | -1.19871065836654 | C                 | -0.99879718618111 | 3.94043829323470  | -1.19040308967168 |
|    | N                 | -2.10893667080226 | 4.17929373038081  | -0.50756051639750 | N                 | -2.09862649795867 | 4.14021805647697  | -0.50310381331443 |
|    | N                 | -2.40905750414898 | 3.02714498028945  | 0.13038975409094  | N                 | -2.39046019549109 | 2.99965628673017  | 0.12638584712641  |
|    | C                 | -1.50949719764691 | 2.09021317744088  | -0.15615151950982 | C                 | -1.49047832197830 | 2.07021126252435  | -0.15808970279698 |
|    | C                 | -1.62027806038445 | 0.69901633151130  | 0.27323036896517  | C                 | -1.61448563449938 | 0.68442535735948  | 0.26941426438954  |
|    | C                 | -1.35119973209434 | -0.35490526712129 | -0.60776892921833 | C                 | -1.35129661439281 | -0.37187817720847 | -0.60022089345344 |
|    | C                 | -1.41068572217627 | -1.66543145907667 | -0.16190003954435 | C                 | -1.45905994913924 | -1.67537305765128 | -0.15842550062586 |
|    | C                 | -1.77395898814205 | -1.90399367003077 | 1.15750083135374  | C                 | -1.86478786262354 | -1.90104756394123 | 1.14432834829556  |
|    | N                 | -1.77015610665621 | -3.29768792374119 | 1.64718978519399  | N                 | -1.93430178310064 | -3.28470121361516 | 1.62795992247775  |
|    | O                 | -2.39090949365567 | -3.54003078877361 | 2.66784165384112  | O                 | -2.55334756677605 | -3.48833747020691 | 2.64563109554911  |
|    | O                 | -1.13228783854119 | -4.11018427915554 | 0.98875479977786  | O                 | -1.35839260527413 | -4.12452406377921 | 0.97040675099568  |
|    | C                 | -2.12146686811755 | -0.88099713553054 | 2.03023190673954  | C                 | -2.19632292006759 | -0.87236254591398 | 2.00707347066530  |
|    | C                 | -2.03981894080013 | 0.43003697822709  | 1.58222621743302  | C                 | -2.06508660802808 | 0.42968529014824  | 1.56391954253112  |
|    | O                 | 1.04231190187457  | -2.99117005039927 | 3.12275642012796  | O                 | 1.25374835059648  | -2.96529700834790 | 3.14285184059179  |
|    | H                 | 2.35024041724400  | -3.14033435265145 | -0.49503910420679 | H                 | 2.43883548138045  | -3.10481696058163 | -0.49724883158037 |
|    | H                 | 2.27177509570230  | -1.18617781151552 | -2.06607136069836 | H                 | 2.28584933718259  | -1.15835419673680 | -2.06494581929637 |
| H  | 1.12717823188699  | -0.60665440524641 | 2.72601485524476  | H                 | 1.21295890759334  | -0.60586808488721 | 2.73479519833854  |                   |
| H  | 1.10050627469849  | 1.35352461787813  | 1.19725500033646  | H                 | 1.10825503034422  | 1.34784274943619  | 1.20630719868547  |                   |
| H  | -1.08392766166362 | -0.15273895433619 | -1.63812840951826 | H                 | -1.05648223689555 | -0.17784393063203 | -1.62421117295797 |                   |
| H  | -1.16861757840891 | -2.49611520422843 | -0.80953445153599 | H                 | -1.23188538466116 | -2.51458376118788 | -0.80077767198081 |                   |
| H  | -2.42064673533783 | -1.12077720515546 | 3.04154146807623  | H                 | -2.52905892387238 | -1.10325375558166 | 3.00973370358325  |                   |
| H  | -2.28069436761737 | 1.25395277448030  | 2.24214739809656  | H                 | -2.29774120783998 | 1.26121582284184  | 2.21656192224703  |                   |
| 3g | C                 | -2.81942688953291 | -2.38041380490466 | -0.42275071023116 | C                 | -2.78520793932678 | -2.36967084385513 | -0.45814422745537 |
|    | C                 | -2.61243938540039 | -0.92039274838575 | -0.65260034554364 | C                 | -2.58076143455179 | -0.91537777645325 | -0.66144947616993 |
|    | C                 | -1.63738784388533 | -0.19556387647560 | -0.09117963092146 | C                 | -1.61988402531282 | -0.20018200840907 | -0.07563345889724 |
|    | C                 | -1.53612078791786 | 1.23805770762967  | -0.27975131624931 | C                 | -1.52553788803240 | 1.23135125498986  | -0.24229459710087 |
|    | N                 | -2.54919741697858 | 2.05242108472981  | -0.58551199802051 | N                 | -2.54438840019219 | 2.04127874881611  | -0.50961025818393 |



|  |   |                   |                   |                    |   |                   |                   |                   |
|--|---|-------------------|-------------------|--------------------|---|-------------------|-------------------|-------------------|
|  | N | -2.13974039894502 | 3.33853533008213  | -0.57082813140701  | N | -2.14415981746782 | 3.31472179557921  | -0.49315724122751 |
|  | C | -0.85875383089483 | 3.34743073407512  | -0.25324787433328  | C | -0.86094784485858 | 3.32412360568636  | -0.21019801020853 |
|  | N | -0.07648330969489 | 4.43852856529757  | 0.00669454421896   | N | -0.08104770438261 | 4.41350524743619  | 0.02657209409516  |
|  | N | 1.12578784170983  | 4.26513487937001  | 0.42270342833150   | N | 1.12395015829249  | 4.24356482593235  | 0.39738191196147  |
|  | N | -0.42998206628316 | -2.02796537953967 | -0.09137132069187  | N | -0.42731706639872 | 2.01893326598864  | -0.07261742017602 |
|  | N | 0.89931392527373  | 1.84889222197241  | 0.18621963627889   | N | 0.89589874842604  | 1.84387784228241  | 0.16727417463480  |
|  | C | 1.62441369853479  | 2.99535758262326  | 0.51893175144308   | C | 1.62207932629093  | 2.97965028653162  | 0.47217926914888  |
|  | N | 2.86150399594307  | 2.64150159765776  | 0.81241100539704   | N | 2.86207551598978  | 2.63060625769072  | 0.73143899758156  |
|  | N | 2.95571651794882  | 1.30508935912719  | 0.64639021296769   | N | 2.95106748482264  | 1.30815396490611  | 0.57073449700065  |
|  | C | 1.78449591446855  | 0.80209636524188  | 0.24883897011653   | C | 1.77484758577226  | 0.80437670475183  | 0.21286947589297  |
|  | C | 1.54669565585245  | -0.57601309894529 | -0.13235533180500  | C | 1.53003061366925  | -0.57313687581092 | -0.14502335639601 |
|  | C | 2.31071394284280  | -1.58065713672529 | 0.31286338776343   | C | 2.28314723317293  | -1.56916307015365 | 0.32242901288466  |
|  | C | 2.16758899145517  | -3.00360691674990 | -0.11393128393371  | C | 2.13465915599107  | -2.98911973395139 | -0.07763519149187 |
|  | H | -2.79514352758765 | -2.93229886628313 | -1.36885774320077  | H | -2.75078373343039 | -2.90303801427687 | -1.41310921458459 |
|  | H | -3.80648738453645 | -2.56519429163737 | 0.01533998157418   | H | -3.77686592114105 | -2.55993077730119 | -0.03569727016174 |
|  | H | -2.06560167088096 | -2.80377691106598 | 0.24489989326079   | H | -2.03744196204679 | -2.79798745924552 | 0.21117421057700  |
|  | H | -3.31265378623703 | -0.41394902472196 | -1.31231771383138  | H | -3.26979956238658 | -0.39804549140891 | -1.32398916932365 |
|  | H | -0.92461649557801 | -0.66072475782340 | 0.58084078569848   | H | -0.91285926659627 | -0.67418033570377 | 0.59578865538131  |
|  | H | 0.75624097525189  | -0.76425682074944 | -0.85054127705125  | H | 0.74051741415806  | -0.77139953452791 | -0.86109216716238 |
|  | H | 3.09940353920097  | -1.34884606339379 | 1.02439444045835   | H | 3.06665323194776  | -1.32589774609296 | 1.03538006627675  |
|  | H | 1.34475618714210  | -3.14168260602888 | -0.81894424392490  | H | 1.31333451359673  | -3.13130215456323 | -0.78177827385245 |
|  | H | 1.99857896786512  | -3.65593149525985 | 0.74983299195948   | H | 1.96254942004198  | -3.62283866931226 | 0.79771768084909  |
|  | H | 3.08872464086378  | -3.35740238819617 | -0.59017210832316  | H | 3.05609216395287  | -3.35257330952539 | -0.54351071389219 |
|  | O | 2.88497892197339  | 2.45023015445832  | 2.01316287027928   | O | 3.01742852585727  | 2.40629570932363  | 2.02248135782983  |
|  | C | 2.56905797544522  | 1.41754598578366  | 2.57230002005107   | C | 2.66132560241052  | 1.39061773857568  | 2.57995040143408  |
|  | C | 2.58850912101715  | 1.26815672329604  | 4.08300830838295   | C | 2.69007061797262  | 1.23431042261366  | 4.07840314644444  |
|  | N | 2.18932479365440  | 0.26333972933963  | 1.91341712357823   | N | 2.22788838883922  | 0.26726988083288  | 1.92312353880689  |
|  | C | 1.97459282073473  | 0.08256496230448  | 0.54620492127902   | C | 1.99323339172764  | 0.09988201740206  | 0.56648849751313  |
|  | C | 2.08199913470499  | 1.11120530316656  | -0.40089418279920  | C | 2.07888906649210  | 1.13343324696144  | -0.36740747745156 |
|  | C | 1.68110758100912  | 0.87484549723321  | -1.70630906280070  | C | 1.66518221903239  | 0.90512730519036  | -1.66474721905593 |
|  | C | 1.56985279898625  | -1.19578354329515 | 0.12451849889523   | C | 1.59425981585804  | -1.17172514063434 | 0.14114253209854  |
|  | C | 1.19440988970161  | -1.42660763808952 | -1.18621220601417  | C | 1.20373459682628  | -1.39383753266673 | -1.16099483245885 |
|  | C | 1.20358481956690  | -0.37839745782887 | -2.10897988754000  | C | 1.19482640119009  | -0.34221151547811 | -2.07028221801037 |
|  | C | 0.67648479698104  | -0.50998725188096 | -3.46568472086036  | C | 0.68217957538198  | -0.47296244891355 | -3.42781534508690 |
|  | N | 1.13515255235949  | -1.21909227542795 | -4.49463867117706  | N | 1.17487840196019  | -1.16592867399712 | -4.44460161398191 |
|  | N | 0.50434802420666  | -0.84213268140798 | -5.63946764505084  | N | 0.56441081337166  | -0.80964118221696 | -5.58692611175835 |
|  | C | -0.36115484218003 | 0.10535741646489  | -5.32577336551122  | C | -0.32505817435085 | 0.11284016368372  | -5.29059024010824 |
|  | N | -1.06831406116617 | 0.92890374601709  | -6.16800312123821  | N | -1.03405132252972 | 0.90718673037299  | -6.14637663190682 |
|  | N | -1.70592025864136 | 1.93001202008215  | -5.67949437110218  | N | -1.70082336721831 | 1.88327123750392  | -5.67754108606067 |
|  | N | -0.31565181656998 | 0.30048064220418  | -3.952188374465949 | N | -0.31099252211879 | 0.30804347699540  | -3.92930693592786 |
|  | N | -1.19912397737172 | 1.19368913831199  | -3.42355849271871  | N | -1.21834269300830 | 1.17191289806199  | -3.42545700584520 |
|  | C | -1.78005624951405 | 2.08624112341176  | -4.31504857051297  | C | -1.80343067322193 | 2.03518511481677  | -4.32260417293651 |
|  | N | -2.51227602863061 | 2.94609333888765  | -3.63063901871159  | N | -2.57156460872372 | 2.87141595197889  | -3.65960199041719 |
|  | N | -2.44140383839552 | 2.59189245947065  | -2.32128813641979  | N | -2.51712120676587 | 2.52717452491587  | -2.36390582942991 |
|  | C | -1.67437691048801 | 1.51285570957800  | -2.17777072206331  | C | -1.72466267898398 | 1.47723471081305  | -2.20042111299117 |
|  | C | -1.59975056763480 | 0.66465022826489  | -0.98231270103858  | C | -1.65026330273476 | 0.64511518940266  | -0.99967808645090 |
|  | C | -1.19682817940359 | 1.16420450944085  | 0.25735093984742   | C | -1.25097155609761 | 1.15316122908839  | 0.23059876154860  |
|  | C | -1.21822150150011 | 0.35543625276520  | 1.38741517093435   | C | -1.26521790611200 | 0.35483723304297  | 1.36091123314967  |

|  |   |                   |                   |                   |   |                   |                   |                   |
|--|---|-------------------|-------------------|-------------------|---|-------------------|-------------------|-------------------|
|  | C | -1.64951778124151 | -0.96780011224808 | 1.28582899308358  | C | -1.68819559343665 | -0.96588845253738 | 1.26907117008351  |
|  | N | -1.69412422744748 | -1.83034141234847 | 2.41107251019214  | N | -1.72094707484680 | -1.81713887782544 | 2.38806910170126  |
|  | C | -0.76028204140879 | -1.92730622658873 | 3.40721800249255  | C | -0.80315673706336 | -1.89148896459361 | 3.39041614942575  |
|  | C | -1.06389793255837 | -2.94988524658610 | 4.48178855389655  | C | -1.08887423785889 | -2.92703117833285 | 4.44251856062488  |
|  | O | 0.25228712727054  | -1.24209399763541 | 3.45027727354983  | O | 0.18236561462226  | -1.17883266283005 | 3.45233274567138  |
|  | C | -2.07411439728215 | -1.46755949612354 | 0.05236131850561  | C | -2.11788481420419 | -1.47092687765252 | 0.04614373629822  |
|  | C | -2.04765669516110 | -0.65899522230488 | -1.07226351259813 | C | -2.09671329800272 | -0.67267473670589 | -1.07887774813142 |
|  | H | 1.86247896878541  | 0.53896030335170  | 4.44682483000709  | H | 1.92302991236605  | 0.54935197314070  | 4.44267067001698  |
|  | H | 2.39619092660794  | 2.24199980525605  | 4.53142424043795  | H | 2.56760973682414  | 2.21556987197551  | 4.53238264455017  |
|  | H | 3.58532166022623  | 0.94470959005119  | 4.39819350080795  | H | 3.66800695819878  | 0.84376960503326  | 4.37237413080661  |
|  | H | 1.80438935990492  | -0.46890477746643 | 2.49745325300984  | H | 1.82755549387806  | -0.45378141289608 | 2.50882592562147  |
|  | H | 2.43532638572444  | 2.08276380223525  | -0.09353042055245 | H | 2.43116937580948  | 2.10458255572033  | -0.05598215262809 |
|  | H | 1.73197462000281  | 1.68579007693634  | -2.42584532002436 | H | 1.70333022089711  | 1.72120113895548  | -2.37835077629827 |
|  | H | 1.51517919844318  | -1.99984813777376 | 0.85037369141122  | H | 1.56089456296493  | -1.98164753574073 | 0.86101650985922  |
|  | H | 0.84925161123032  | -2.40793611193217 | -1.49007265765309 | H | 0.86826530459128  | -2.37601507077188 | -1.47030117290889 |
|  | H | -0.85878771131559 | 2.18979648788670  | 0.33550745067264  | H | -0.92045689001508 | 2.18138744126582  | 0.30180388145872  |
|  | H | -0.88524105532651 | 0.74423391273098  | 2.33893135114067  | H | -0.93601419557969 | 0.75040555496264  | 2.31076747077494  |
|  | H | -2.43988594062654 | -2.50871047872730 | 2.41672720223623  | H | -2.43217988463778 | -2.52858010135829 | 2.37866610679819  |
|  | H | -1.16572166666705 | -2.43032108666637 | 5.43708518707690  | H | -1.22283107914025 | -2.41709194865982 | 5.39803178825642  |
|  | H | -0.21209895226680 | -3.62639672307576 | 4.57162192406699  | H | -0.21647194237959 | -3.57431760466106 | 4.53799501970345  |
|  | H | -1.96825442598604 | -3.53454315087571 | 4.30356577301483  | H | -1.97107114236819 | -3.53409257413489 | 4.23850792395392  |
|  | H | -2.40690765837623 | -2.49754875133115 | -0.02932860675679 | H | -2.43242269490834 | -2.49962941230955 | -0.02667808318575 |
|  | H | -2.38593437137661 | -1.05446713931508 | -2.02393377104696 | H | -2.43951500076471 | -1.07383901771319 | -2.02584516139951 |
|  | C | 3.53213392283286  | 1.91935421987362  | -2.37478930868175 | C | 3.55998492244083  | 1.92381291667699  | -2.34996971352889 |
|  | C | 2.22321918153283  | 1.10987760111238  | -2.33174882176521 | C | 2.26011176674064  | 1.11979430058050  | -2.31447492458869 |
|  | C | 1.07382857876317  | 1.89719686678448  | -2.97211320942689 | C | 1.12426586112629  | 1.90044085429377  | -2.96116124582519 |
|  | C | 1.93583764842808  | 0.66301199680281  | -0.91020911515257 | C | 1.96352143551620  | 0.68240948273272  | -0.90175162594689 |
|  | C | 2.45139809534400  | -0.55068467287774 | -0.44079846886037 | C | 2.48226925830138  | -0.51861996145048 | -0.42194883464850 |
|  | C | 2.25435836355777  | -0.96195573537285 | 0.86966651171670  | C | 2.26994672629891  | -0.92548476905797 | 0.88112885464800  |
|  | C | 1.21853313832778  | 1.46234469311972  | -0.01521087675523 | C | 1.22702436472628  | 1.47381818623922  | -0.02532800346324 |
|  | C | 1.01815298304401  | 1.06402846114382  | 1.29821169559934  | C | 1.01234264632711  | 1.08026515880081  | 1.28169119302339  |
|  | C | 1.51748793265606  | -0.16118242583530 | 1.74911624076790  | C | 1.51551711615249  | -0.13221473183408 | 1.74211639309486  |
|  | C | 1.34520572094371  | -0.59047110210988 | 3.13163907153263  | C | 1.34104805942113  | -0.55361694757550 | 3.12182481346230  |
|  | N | 2.29624834103255  | -1.17878953792814 | 3.85699752572338  | N | 2.30050004237315  | -1.11277410473848 | 3.84786626779737  |
|  | N | 1.90161600545718  | -1.29948067757580 | 5.14503276540387  | N | 1.91283129134216  | -1.23529277151766 | 5.12152565183962  |
|  | C | 0.68870210982204  | -0.79166766720963 | 5.23811008372651  | C | 0.69405836214914  | -0.75627299507990 | 5.20994962565600  |
|  | N | -0.01920308196743 | -0.54981907700540 | 6.38587833858450  | N | -0.01427856400743 | -0.53399245864422 | 6.35247462911675  |
|  | N | -1.12556074448499 | 0.09354011712521  | 6.31749963737761  | N | -1.12560925601530 | 0.07671425840259  | 6.28242543785256  |
|  | N | 0.27761816497486  | -0.36896559008637 | 3.97097503993120  | N | 0.27742221847938  | -0.35346131430906 | 3.95364488197068  |
|  | N | -1.01473756943317 | 0.08839269061611  | 3.88044302831040  | N | -1.01101782633048 | 0.07216326096456  | 3.86217921440297  |
|  | C | -1.63483461692276 | 0.41983702162578  | 5.08786551120795  | C | -1.63478865309398 | 0.38512214244394  | 5.05644227745209  |
|  | N | -2.82054160772246 | 0.93474904953582  | 4.83015675345874  | N | -2.82539288975764 | 0.87420931800539  | 4.79947052749071  |
|  | N | -2.99446687616288 | 0.90708328795751  | 3.48842755307402  | N | -2.99321063027920 | 0.84619307273669  | 3.47282878855974  |
|  | C | -1.93035907673739 | 0.36984822924683  | 2.89318005257125  | C | -1.92168186068429 | 0.3358778488592   | 2.88087204267066  |
|  | C | -1.85227720048270 | 0.03787449370537  | 1.47616300100740  | C | -1.84706003730907 | 0.01091295128110  | 1.46687222467789  |
|  | C | -2.39946903824753 | 0.91223376995903  | 0.53145715300923  | C | -2.40552825958171 | 0.88185522148291  | 0.53539132146854  |
|  | C | -2.33565436934018 | 0.59897782594191  | -0.81872907247492 | C | -2.35898388438584 | 0.57218132215033  | -0.81021492258163 |
|  | C | -1.74163933010898 | -0.58738713940791 | -1.26470623811082 | C | -1.77163954177686 | -0.60722677668184 | -1.26349620374627 |

3i

|  |   |                   |                   |                   |   |                   |                   |                   |
|--|---|-------------------|-------------------|-------------------|---|-------------------|-------------------|-------------------|
|  | C | -1.73148128792277 | -0.92094968267836 | -2.74505548306156 | C | -1.77346167607337 | -0.93281844032623 | -2.73607954164477 |
|  | C | -2.99967998312155 | -1.70978647473546 | -3.11753398929946 | C | -3.03200042926438 | -1.72129430225487 | -3.09751990885664 |
|  | C | -0.47026062522001 | -1.66933836105881 | -3.19332106578923 | C | -0.52146853828560 | -1.66912952312581 | -3.19353880279931 |
|  | C | -1.22383449622297 | -1.46488340565932 | -0.30754480141770 | C | -1.24179769928118 | -1.48137330977164 | -0.31895188172140 |
|  | C | -1.28318895352982 | -1.16399544362936 | 1.04494662060578  | C | -1.28306166461715 | -1.18347541303140 | 1.02941629543955  |
|  | H | 3.78044871803546  | 2.20191768424392  | -3.40193575238968 | H | 3.81472498962038  | 2.19971023960099  | -3.37617476001667 |
|  | H | 4.36819716872212  | 1.34634388592850  | -1.96701262170249 | H | 4.39130859208246  | 1.35429939801340  | -1.93020595627890 |
|  | H | 3.43869590513045  | 2.83603311588324  | -1.78511171684971 | H | 3.45635173264715  | 2.84284218111975  | -1.76707602439978 |
|  | H | 2.37900101363324  | 0.20312820148412  | -2.92849792693068 | H | 2.41988113549521  | 0.20767356481772  | -2.90144453284844 |
|  | H | 0.12424392047372  | 1.36626737985753  | -2.88343403595698 | H | 0.17580964083770  | 1.36496286365220  | -2.88980492138241 |
|  | H | 1.27381675948241  | 2.06260494085494  | -4.03379135135911 | H | 1.34111705558712  | 2.07438835474364  | -4.01712461035081 |
|  | H | 0.95022619178057  | 2.88151786846329  | -2.51222437500296 | H | 0.99321512155486  | 2.87961645525580  | -2.49408992429654 |
|  | H | 3.01688534474083  | -1.18443815557439 | -1.11758626089835 | H | 3.06222069143824  | -1.14873103517163 | -1.08850917396755 |
|  | H | 2.66147087359408  | -1.90147954255630 | 1.22385745307172  | H | 2.67951830560583  | -1.85959045417725 | 1.24509692910996  |
|  | H | 0.80951214685285  | 2.41130224397121  | -0.33999931857689 | H | 0.81336872356362  | 2.41622148582528  | -0.36157841140726 |
|  | H | 0.47491688901307  | 1.71437094137847  | 1.97447012123306  | H | 0.45232241741011  | 1.72716458730772  | 1.94681709197516  |
|  | H | -2.86076478334972 | 1.83343678120924  | 0.86714002663860  | H | -2.86317676471135 | 1.80139720256060  | 0.87880522245526  |
|  | H | -2.75033176339495 | 1.29090735044827  | -1.54576117310609 | H | -2.78288553651312 | 1.26415716138134  | -1.53100700433429 |
|  | H | -1.76478844695158 | 0.03109095632109  | -3.28810929492706 | H | -1.81672555058823 | 0.02345582872732  | -3.27028493155392 |
|  | H | -3.02841079301121 | -1.91468547768539 | -4.19161889982481 | H | -3.06944983614948 | -1.91657494876282 | -4.17200206912847 |
|  | H | -3.02624436510344 | -2.66749916641781 | -2.58939274564047 | H | -3.04225532957543 | -2.68253038860891 | -2.57683081545276 |
|  | H | -3.90443606616129 | -1.15851325969828 | -2.85079527497783 | H | -3.94258662333555 | -1.17858744270899 | -2.81433831266997 |
|  | H | 0.43678362094570  | -1.16440620736203 | -2.85625358278919 | H | 0.38609209267686  | -1.15365751762444 | -2.87440625745847 |
|  | H | -0.44702580736100 | -2.69174607983680 | -2.80624604782844 | H | -0.48678861575787 | -2.68660341811405 | -2.79655694682442 |
|  | H | -0.43808826189450 | -1.73811448008904 | -4.28361888061602 | H | -0.50773242041031 | -1.74757125166894 | -4.28262464435457 |
|  | H | -0.76531987527891 | -2.39684948613782 | -0.61527315886988 | H | -0.78682485371645 | -2.41155268489649 | -0.63565030917329 |
|  | H | -0.88613971898723 | -1.86968282606601 | 1.76608868449053  | H | -0.87488801839331 | -1.88871259355055 | 1.74420553108589  |
|  | C | -1.62041976068320 | 3.37193268763346  | 1.88195829746309  | C | -1.83290683025910 | 3.33593761174269  | 1.88887576508159  |
|  | O | -1.47037608398530 | 3.35242482389859  | 0.46956959775047  | O | -1.61454600632694 | 3.33672879091681  | 0.49758226257585  |
|  | C | -1.47808663348975 | 2.15301895766975  | -0.15998191748994 | C | -1.55670747016481 | 2.15049509439811  | -0.13395155350836 |
|  | C | -1.27775161956928 | 2.19038220822580  | -1.54701509188895 | C | -1.32497291704656 | 2.20008032137289  | -1.50968933460556 |
|  | C | -1.22019900672935 | 1.01673805582551  | -2.27241548606383 | C | -1.21853230981932 | 1.03640368607559  | -2.23495222943533 |
|  | C | -1.66953067580182 | 0.92432463413192  | 0.48050433307617  | C | -1.71510293158112 | 0.91926500535265  | 0.49675944779519  |
|  | C | -1.60821285161156 | -0.25050858577649 | -0.25687983882549 | C | -1.60586327602525 | -0.24483143676066 | -0.24238572364135 |
|  | C | -1.35104522964348 | -0.22353317193322 | -1.62838338949440 | C | -1.33073620358271 | -0.20416953571924 | -1.60307917514936 |
|  | C | -1.25394779080580 | -1.44250050067630 | -2.41760959938128 | C | -1.21736899034561 | -1.41308849922176 | -2.39708769511277 |
|  | N | -1.80816586087710 | -1.60280752209753 | -3.61881743025708 | N | -1.75913304938645 | -1.56373862539522 | -3.59856943590218 |
|  | N | -1.64226945770240 | -2.87383713302117 | -4.04987946940286 | N | -1.60809670972518 | -2.82197053774412 | -4.02554450865879 |
|  | C | -0.97212365455349 | -3.52452130027103 | -3.12122082931064 | C | -0.95984888861877 | -3.47949678048477 | -3.09354057193082 |
|  | N | -0.72566901748570 | -4.87060550565429 | -3.07903583896422 | N | -0.76374185022882 | -4.82253493626211 | -3.05154277110755 |
|  | N | -0.17763854124023 | -5.37394410986597 | -2.03621036699100 | N | -0.21610880733597 | -5.32918331858473 | -2.01001039813515 |
|  | N | -0.66707066059383 | -2.64167335969320 | -2.07873230237279 | N | -0.65495968401601 | -2.61104013966207 | -2.05912400534181 |
|  | N | 0.12442943165879  | -3.14732469839417 | -1.07191834331618 | N | 0.10976018964141  | -3.12255659303230 | -1.05498886556619 |
|  | C | 0.24514349621033  | -4.54159842265038 | -1.03434844956219 | C | 0.20661285596364  | -4.50339650837832 | -1.01247818214834 |
|  | N | 0.93908799251072  | -4.88278940008624 | 0.03181187277001  | N | 0.88082635966693  | -4.85153636734995 | 0.05775526429414  |
|  | N | 1.29917618927734  | -3.74427665544880 | 0.66472944230947  | N | 1.25057468387101  | -3.72895892892998 | 0.68162949326118  |
|  | C | 0.84461754047823  | -2.67840725211086 | 0.00538059668434  | C | 0.82252736266967  | -2.66338199857461 | 0.01651670080641  |
|  | C | 1.16467607409385  | -1.30669930715792 | 0.37844829908875  | C | 1.18150135081178  | -1.30247203184035 | 0.37264068703405  |

3j

|  |   |                   |                   |                   |   |                   |                   |                   |
|--|---|-------------------|-------------------|-------------------|---|-------------------|-------------------|-------------------|
|  | C | 1.22085197733228  | -0.97844562883888 | 1.73444395326817  | C | 1.25374773614127  | -0.96108365047102 | 1.71751439634642  |
|  | C | 1.53197936424379  | 0.31316220022753  | 2.14476011385030  | C | 1.62263879591605  | 0.31438573207638  | 2.10961210234640  |
|  | C | 1.79629849400791  | 1.29699292928036  | 1.18726382651252  | C | 1.93263645811143  | 1.26801890377331  | 1.14345528697204  |
|  | O | 2.07005451007659  | 2.59513242033662  | 1.47277349193001  | O | 2.27848805201352  | 2.54004839681004  | 1.41396682927733  |
|  | C | 2.24991962636460  | 2.96559014988683  | 2.83326065084094  | C | 2.37588806166921  | 2.92976632363404  | 2.76401156009739  |
|  | C | 1.78411041480196  | 0.96317829647369  | -0.17419410844359 | C | 1.89749240342594  | 0.92071661580546  | -0.20820580836174 |
|  | C | 1.48173885791839  | -0.32346339235176 | -0.57135910561419 | C | 1.53344270358445  | -0.34970400698511 | -0.58586418827058 |
|  | H | -2.60368073887236 | 2.99662259638568  | 2.18347889301062  | H | -2.80442390612204 | 2.89877430419874  | 2.14079621389733  |
|  | H | -1.52492929276876 | 4.41503110939524  | 2.17547915674426  | H | -1.81680045053425 | 4.37863894149008  | 2.19897283874858  |
|  | H | -0.83872151916150 | 2.78131971245444  | 2.36841029577479  | H | -1.04390421440491 | 2.78801745046743  | 2.41434777969940  |
|  | H | -1.15392098090932 | 3.15541481553597  | -2.02402001934241 | H | -1.22210048769858 | 3.16842893662262  | -1.98311372013194 |
|  | H | -1.05813158051269 | 1.04062052117689  | -3.34332355365806 | H | -1.03617010044406 | 1.06994065901690  | -3.30189698562313 |
|  | H | -1.85176017711333 | 0.86840428016852  | 1.54466337713803  | H | -1.91704104060131 | 0.85558681542278  | 1.55649512250734  |
|  | H | -1.75637529035183 | -1.19653403120787 | 0.25126282538946  | H | -1.73833343760362 | -1.19654914230836 | 0.25853008301339  |
|  | H | 1.01466654765974  | -1.74620209360351 | 2.47037652483034  | H | 1.01483538280424  | -1.70936653434306 | 2.46304021847466  |
|  | H | 1.55917392167676  | 0.53853933645382  | 3.20277364528852  | H | 1.66300052488497  | 0.55338014720972  | 3.16335723607334  |
|  | H | 2.51299266611974  | 4.02087763054307  | 2.82007366163057  | H | 2.67526968236374  | 3.97560275027204  | 2.75658755235690  |
|  | H | 3.05780510221856  | 2.39093253963485  | 3.29652116043734  | H | 3.12883760041448  | 2.34019603318827  | 3.29636709768106  |
|  | H | 1.32968978136673  | 2.82999055876021  | 3.41131310641492  | H | 1.41383486128904  | 2.83432588508607  | 3.27884877238435  |
|  | H | 2.01265708170283  | 1.73606170298863  | -0.89728487482077 | H | 2.16184167729394  | 1.66975000033909  | -0.94354156992075 |
|  | H | 1.49115735474290  | -0.56702009624776 | -1.62712710700320 | H | 1.52684281933462  | -0.60542883322399 | -1.63859598817264 |
|  | C | -4.35339077980862 | -1.88415511631701 | -1.66034018571199 | C | -4.35349149521576 | -1.87731060918073 | -1.60855907066102 |
|  | O | -3.15180218086745 | -2.55938600377780 | -1.31129112777971 | O | -3.17757251075400 | -2.57050430347302 | -1.25753643372042 |
|  | C | -2.29400231289938 | -1.94412175675815 | -0.45729122065156 | C | -2.31003717227778 | -1.95990133395390 | -0.42683159931501 |
|  | C | -2.48141836474771 | -0.66426902602083 | 0.05999227549061  | C | -2.47679677267017 | -0.67335545197016 | 0.06496399069270  |
|  | C | -1.51673222989585 | -0.11887469613985 | 0.91753336313821  | C | -1.50679606583351 | -0.12989678181205 | 0.90672650103309  |
|  | C | -1.75398370470740 | 1.22154965617258  | 1.44462677313560  | C | -1.73534447885141 | 1.21054754375036  | 1.42436757931270  |
|  | N | -2.93943327971832 | 1.65748508519066  | 1.86824162975136  | N | -2.91567311534943 | 1.64233660174413  | 1.84743250278999  |
|  | N | -2.81836698354929 | 2.87845433617176  | 2.43718450638624  | N | -2.79776687094843 | 2.84697443600826  | 2.41473891318419  |
|  | C | -1.54915024413665 | 3.22473986265859  | 2.36623943287835  | C | -1.53352407642133 | 3.19154940443136  | 2.34644527750776  |
|  | N | -0.95742097332034 | 4.30620183696469  | 2.96353156789736  | N | -0.95077817012584 | 4.26834456431617  | 2.94375678929227  |
|  | N | 0.31694258614380  | 4.42617368632021  | 2.91864662828188  | N | 0.31209151437555  | 4.38933200879582  | 2.90010426767235  |
|  | N | -0.84055650055365 | 2.21722949563790  | 1.70369409059002  | N | -0.83066583810559 | 2.19810403018651  | 1.68680553646344  |
|  | N | 0.48597512597817  | 2.47921287668196  | 1.45332413817877  | N | 0.48247239246195  | 2.45882445245830  | 1.44194098004328  |
|  | C | 1.04800189428950  | 3.53408565117689  | 2.17987513355946  | C | 1.03686431011370  | 3.50392918089304  | 2.16082495303274  |
|  | N | 2.33762585396697  | 3.59489347713272  | 1.91690267888650  | N | 2.32123456789110  | 3.56796675922145  | 1.90014228814001  |
|  | N | 2.61440906936548  | 2.62778380141725  | 1.01354122822770  | N | 2.59652001918760  | 2.61280898482111  | 1.00660629548130  |
|  | C | 1.50796896820112  | 1.95777256497740  | 0.69371268859361  | C | 1.49687376321431  | 1.94312481762881  | 0.68831023166013  |
|  | C | 1.44525838566107  | 0.94554668980741  | -0.35629144791547 | C | 1.44269735404137  | 0.94154730413286  | -0.36588647110098 |
|  | C | 2.52545766132383  | 0.06015747497978  | -0.47099302779080 | C | 2.52391175839661  | 0.06831905903708  | -0.48191881277752 |
|  | C | 2.51304581907372  | -0.91275707304617 | -1.46796162753809 | C | 2.52776667872627  | -0.88393889139783 | -1.49067579821348 |
|  | O | 3.49767814622107  | -1.82861790700307 | -1.65732440542391 | O | 3.51657394365376  | -1.77984992762551 | -1.67948998416089 |
|  | C | 4.63612139603970  | -1.77558362971625 | -0.80737806771011 | C | 4.62415947849546  | -1.72999796339899 | -0.80925205648164 |
|  | C | 1.42477004889751  | -0.99173423528493 | -2.34749186342653 | C | 1.45403202252161  | -0.95465994203006 | -2.37933939833439 |
|  | C | 0.37565336332118  | -0.09257795985327 | -2.24082460248363 | C | 0.40348046016917  | -0.06691202731700 | -2.26861425967019 |
|  | C | 0.37930464885965  | 0.88884919655124  | -1.25270696338436 | C | 0.39098266942584  | 0.89481939282291  | -1.26935232053568 |
|  | C | -0.39482587171810 | -0.85750022548532 | 1.29046758364692  | C | -0.39862644481011 | -0.87265373802567 | 1.28785449696733  |
|  | C | -0.21773532027280 | -2.13461854135251 | 0.76395423533776  | C | -0.24200898931895 | -2.15598129769397 | 0.78559865529591  |

|  |   |                   |                   |                   |   |                   |                   |                   |
|--|---|-------------------|-------------------|-------------------|---|-------------------|-------------------|-------------------|
|  | C | -1.14984844409670 | -2.67415678828221 | -0.10795225336168 | C | -1.18041568990791 | -2.69691358684147 | -0.06908261773340 |
|  | H | -4.14622969551382 | -0.95060293945987 | -2.19438095516685 | H | -4.12713299698797 | -0.95781910575555 | -2.15871356089117 |
|  | H | -4.89343475750060 | -2.56306137842743 | -2.31671121133134 | H | -4.91996238156976 | -2.54860647126673 | -2.25054924036105 |
|  | H | -4.96094599945493 | -1.67022992504766 | -0.77548433256898 | H | -4.94994636190457 | -1.63096943904575 | -0.72457227363688 |
|  | H | -3.35228225277890 | -0.07151023046192 | -0.18161927161853 | H | -3.33943227250406 | -0.07296656719170 | -0.18689241677720 |
|  | H | 3.34738390433248  | 0.15667379389591  | 0.22390832160183  | H | 3.33722418276763  | 0.15577431753594  | 0.22412633806594  |
|  | H | 5.15235754548388  | -0.81425306788570 | -0.89241834249680 | H | 5.13189183460715  | -0.76196100573033 | -0.86418841258224 |
|  | H | 5.29438592956665  | -2.57300843785479 | -1.14512919093576 | H | 5.30336929826907  | -2.51335328243128 | -1.13884834798881 |
|  | H | 4.36055491956407  | -1.94939218576841 | 0.23832467580877  | H | 4.32625321765644  | -1.92211948443966 | 0.22691263992153  |
|  | H | 1.43158803179204  | -1.76525320723715 | -3.10651583347310 | H | 1.47122213057201  | -1.71295419632244 | -3.15236291885367 |
|  | H | -0.45674066214217 | -0.15696674985045 | -2.93231206461760 | H | -0.41888151192539 | -0.12241252541427 | -2.97135390973687 |
|  | H | -0.43758763562373 | 1.59699174025535  | -1.18544150415539 | H | -0.42867535897890 | 1.59883765311799  | -1.20088461096196 |
|  | H | 0.33288606382330  | -0.44677925646674 | 1.97982598040286  | H | 0.33475540482104  | -0.46124918950589 | 1.96989179592182  |
|  | H | 0.65908068726084  | -2.71164666465758 | 1.03482723267348  | H | 0.62494945996787  | -2.74115847022435 | 1.06683426048261  |
|  | H | -1.02086185585962 | -3.66274422383720 | -0.53289466492505 | H | -1.06609788687467 | -3.69569491885381 | -0.47187977846661 |
|  | C | -2.51894586314904 | 1.21914149389009  | 3.02142265554820  | C | -2.60238471180487 | 1.24994719169628  | 3.00465090978915  |
|  | O | -2.44613338025082 | 0.57459727008366  | 1.75959873122250  | O | -2.51471302127056 | 0.58463236764222  | 1.76794647979596  |
|  | C | -1.70619015148949 | 1.16517243405842  | 0.78257905950488  | C | -1.77371895023894 | 1.15938606618977  | 0.79869430491047  |
|  | C | -1.56304752209114 | 0.42447424492399  | -0.40438822416666 | C | -1.61319624480667 | 0.40967318621433  | -0.37473127939967 |
|  | O | -2.12289000957896 | -0.81712898614306 | -0.54050888409920 | O | -2.16935132897916 | -0.82490764442524 | -0.49670727502299 |
|  | C | -3.55474029645908 | -0.85479322473347 | -0.63254155696036 | C | -3.57928960182216 | -0.83748029824373 | -0.68755434208343 |
|  | C | -0.77071917682629 | 0.91996395557636  | -1.44124773883775 | C | -0.82609467445290 | 0.90475768139081  | -1.4078442326710  |
|  | C | -0.63133929025977 | 0.15723037835382  | -2.67981117044508 | C | -0.68862925787725 | 0.14418186950480  | -2.64278875277148 |
|  | N | -0.80772637473139 | 0.67788562152692  | -3.89253380080654 | N | -0.91573920407552 | 0.65742201264269  | -3.84378515006048 |
|  | N | -0.73379926927477 | -0.29322547343096 | -4.83449795225873 | N | -0.83907404627074 | -0.29739283923612 | -4.77902205000665 |
|  | C | -0.50557133914820 | -1.43137470893677 | -4.20929850187809 | C | -0.55854212344042 | -1.42376933251681 | -4.16599304415195 |
|  | N | -0.50383028791112 | -2.68836469848065 | -4.75585363908052 | N | -0.52378504633940 | -2.66863790622761 | -4.71947508238770 |
|  | N | -0.39845320246112 | -3.70589016959604 | -3.98399081368787 | N | -0.35813750320745 | -3.67577785101545 | -3.96397972237840 |
|  | N | -0.40254152377178 | -1.18342124712908 | -2.84057866679745 | N | -0.42512104080612 | -1.17877414340432 | -2.81321397781425 |
|  | N | -0.07139258159989 | -2.25090239452396 | -2.05547735926921 | N | -0.04582654684142 | -2.22816097200126 | -2.04787795065821 |
|  | C | -0.18925476935085 | -3.51019865935823 | -2.64380605187631 | C | -0.12244862496743 | -3.47559559497739 | -2.63664740494570 |
|  | N | 0.06259270634503  | -4.43218399097975 | -1.73558124304618 | N | 0.18610689313013  | -4.38857135899617 | -1.74531072215882 |
|  | N | 0.36711365118012  | -3.79082530398731 | -0.58188172123691 | N | 0.48522897272896  | -3.75020955510090 | -0.60731846212267 |
|  | C | 0.31209755254688  | -2.47224594672679 | -0.75977496837571 | C | 0.37141522135027  | -2.43980254564896 | -0.77161875885063 |
|  | C | 0.69447623476909  | -1.50150369036214 | 0.26308259927075  | C | 0.74775872598207  | -1.47059318383704 | 0.24867407080334  |
|  | C | 1.56825838953766  | -0.45916876742964 | -0.05277726534084 | C | 1.61498228197571  | -0.43116490379782 | -0.06800675443456 |
|  | O | 1.97282951239857  | -0.31686473159239 | -1.35230015302489 | O | 2.02008247655318  | -0.27762837158216 | -1.35650874434809 |
|  | C | 3.37377904167880  | -0.49870307964594 | -1.60677426954310 | C | 3.39060356055753  | -0.56882895302307 | -1.60417316275417 |
|  | C | 1.94241903038941  | 0.46430752767818  | 0.94010931542815  | C | 2.00414454512626  | 0.47704425344793  | 0.92627060679796  |
|  | O | 2.74534314806591  | 1.48264091994084  | 0.52780492875115  | O | 2.80922677878254  | 1.48197726003850  | 0.52473982993979  |
|  | C | 3.03569281695941  | 2.51743915497856  | 1.45435039017435  | C | 3.12238643709935  | 2.48167965479255  | 1.46440753075081  |
|  | C | 1.47228142446313  | 0.29604352835170  | 2.24155304566016  | C | 1.54870245227646  | 0.29835894244378  | 2.22542814618392  |
|  | C | 0.62484346934011  | -0.76962235239621 | 2.55170234044263  | C | 0.70915147166724  | -0.76554569333849 | 2.53478441492299  |
|  | C | 0.22769047646135  | -1.66347848280095 | 1.57314014582858  | C | 0.30254211869790  | -1.64790627040562 | 1.55769708585294  |
|  | C | -0.15860119455652 | 2.17413266514135  | -1.32827687692741 | C | -0.23701107494516 | 2.16419527850284  | -1.30771801454745 |
|  | C | -0.32969842955854 | 2.91217002227013  | -0.17035187328522 | C | -0.42065928078775 | 2.90699490795181  | -0.16171763362764 |
|  | C | -1.09196824759090 | 2.41204352370138  | 0.88773053553698  | C | -1.17596923616185 | 2.40868968868608  | 0.89366800428776  |
|  | H | -1.52083574096500 | 1.35264996449244  | 3.45034229805206  | H | -1.60982435610558 | 1.39798645055508  | 3.44267998675743  |

|  |   |                   |                   |                   |   |                   |                   |                   |
|--|---|-------------------|-------------------|-------------------|---|-------------------|-------------------|-------------------|
|  | H | -3.10325815271213 | 0.55831913746277  | 3.65832612215503  | H | -3.19163315198924 | 0.60570729368660  | 3.65411263825226  |
|  | H | -3.02043274504220 | 2.18983542732447  | 2.94820206945109  | H | -3.10396726748266 | 2.21850399046431  | 2.90682466163074  |
|  | H | -3.81438143905786 | -1.90064759334460 | -0.78716268263074 | H | -3.86718772329153 | -1.88439265316977 | -0.76680681210644 |
|  | H | -3.89490559928321 | -0.25928530905742 | -1.48487989207825 | H | -3.84408430366091 | -0.31359773957127 | -1.61096137684441 |
|  | H | -4.01082024107743 | -0.49041334319969 | 0.28803415453153  | H | -4.09252572108500 | -0.37937528866019 | 0.15980775264702  |
|  | H | 3.96007745457934  | 0.27769092497813  | -1.11594792597701 | H | 4.04107978269584  | 0.09419533764457  | -1.03150060099834 |
|  | H | 3.48943193704648  | -0.42631491558563 | -2.68678022200865 | H | 3.54857355078971  | -0.40651077556088 | -2.66897134212754 |
|  | H | 3.69542395197406  | -1.48730656630422 | -1.26621995034523 | H | 3.60969965066861  | -1.61164339923954 | -1.35579235402331 |
|  | H | 3.62610977879473  | 3.24881839467493  | 0.90644716258355  | H | 3.72390821760146  | 3.21780004593919  | 0.93493506810982  |
|  | H | 2.11558505021383  | 2.98700969044344  | 1.81633654614968  | H | 2.21462100836500  | 2.96059153593258  | 1.84624024700745  |
|  | H | 3.61683898717939  | 2.14428723175985  | 2.30401056582550  | H | 3.70028162780595  | 2.07915927762052  | 2.30291597955547  |
|  | H | 1.75373454504742  | 0.99583934944552  | 3.01775306210385  | H | 1.84263468380086  | 0.99008124824337  | 3.00332366993302  |
|  | H | 0.26675837823101  | -0.88586179219057 | -3.56858114154349 | H | 0.36662672983567  | -0.89258229352579 | 3.55454570555784  |
|  | H | -0.44769776665928 | -2.47926894175709 | 1.79292099924116  | H | -0.36335196391075 | -2.47041191169605 | 1.77963913607241  |
|  | H | 0.44858276925338  | 2.53791844462642  | -2.14628708969775 | H | 0.36131821021896  | 2.53140503090480  | -2.13018410114101 |
|  | H | 0.14219170556131  | 3.88361262542732  | -0.07332132581128 | H | 0.03467257006736  | 3.88592293694969  | -0.07370401594496 |
|  | H | -1.19507741715963 | 2.99597043858184  | 1.79312395048771  | H | -1.29358196115560 | 2.99916797011660  | 1.79222708141949  |
|  | C | 1.14926259739879  | 1.62200378200108  | -3.83599434466405 | C | 1.05151638826787  | 2.08426915845144  | -3.83408201719423 |
|  | O | -0.14208755617375 | 1.13152248191338  | -3.47485922270465 | O | -0.08260890882791 | 1.31224437510455  | -3.50557407486419 |
|  | C | -0.47817765013318 | 1.12597045031814  | -2.15015965209146 | C | -0.43103952960822 | 1.22802445314523  | -2.19893107089691 |
|  | C | 0.11851528490513  | 1.87929433616888  | -1.15305214897848 | C | 0.14290386594505  | 1.93720242466165  | -1.16471277078955 |
|  | C | -0.30945517884590 | 1.71350356092992  | 0.17236418537606  | C | -0.29495047224841 | 1.70705452630697  | 0.14075793670153  |
|  | C | 0.33615658250082  | 2.47123539837253  | 1.23707101013043  | C | 0.31575198990591  | 2.45749542111209  | 1.22421290014149  |
|  | N | 0.65474876626746  | 3.76375285119449  | 1.17784761426549  | N | 0.60679720835609  | 3.75090642383320  | 1.16840211803147  |
|  | N | 1.06474241684304  | 4.20526241298070  | 2.39219178541292  | N | 1.00001384801704  | 4.19451085215795  | 2.36875462279273  |
|  | C | 1.01437641661302  | 3.18315488708408  | 3.22400883470068  | C | 0.96641003367280  | 3.17546420617647  | 3.19568319983403  |
|  | N | 1.16240003120075  | 3.21188693623755  | 4.58805045395864  | N | 1.12179037452866  | 3.21239082634055  | 4.55041332348113  |
|  | N | 0.92832221327226  | 2.15067587036337  | 5.26932705821073  | N | 0.91132404207714  | 2.15747483599334  | 5.22703643163935  |
|  | N | 0.60476384212612  | 2.05068222200063  | 2.52032580662406  | N | 0.58341166614510  | 2.04559754007443  | 2.49788317301898  |
|  | N | 0.62799205917079  | 0.87053301425922  | 3.22141255774629  | N | 0.61841896084933  | 0.87886377481608  | 3.19431083682071  |
|  | C | 0.66253262912780  | 0.97701434637611  | 4.61084960904465  | C | 0.66020962648710  | 0.98928196236740  | 4.57076788477172  |
|  | N | 0.58168784702992  | -0.23297414630435 | 5.12992896940949  | N | 0.58311646200044  | -0.21251616002675 | 5.09399705543070  |
|  | N | 0.54117309017998  | -1.11859673450902 | 4.10273847340991  | N | 0.53593613805507  | -1.09077746007166 | 4.08351643625334  |
|  | C | 0.60542384467801  | -0.47602718286357 | 2.93881335473567  | C | 0.59021442379778  | -0.45713060548644 | 2.91986113586232  |
|  | C | 0.75564350836924  | -1.05595258279265 | 1.61235687227212  | C | 0.72515609332123  | -1.07282943452905 | 1.61325129293255  |
|  | C | -0.09379427093495 | -2.07858892519626 | 1.18592643191245  | C | -0.10125159684284 | -2.13315124965631 | 1.262467936666320 |
|  | C | -0.02289043183725 | -2.48986702062149 | -0.13807341002468 | C | -0.00649656571378 | -2.65261326586726 | -0.01560079008118 |
|  | O | -0.82450968627953 | -3.42153242318925 | -0.73064979588656 | O | -0.77024181501222 | -3.65297205314612 | -0.5156890893350  |
|  | C | -1.92291582835695 | -3.93590017892448 | 0.01966932195439  | C | -1.84802167063190 | -4.10769983493872 | 0.27592103355075  |
|  | C | 0.88388998267947  | -1.89881677291822 | -1.03126170400899 | C | 0.90557960507667  | -2.13389442228582 | -0.93782735848184 |
|  | O | 0.86183437533341  | -2.22583935416652 | -2.34530518276258 | O | 0.95136790806340  | -2.60923680351231 | -2.19393501162063 |
|  | C | 1.79144303038152  | -0.93833666436814 | -0.56960860447312 | C | 1.76672691486312  | -1.10392317551457 | -0.55643786735314 |
|  | O | 2.65699390231675  | -0.43892636968736 | -1.49407251054020 | O | 2.62506600930996  | -0.67044573202938 | -1.50246238401906 |
|  | C | 3.65189091064615  | 0.46785209987945  | -1.03869197786407 | C | 3.58401666036758  | 0.28464507435819  | -1.11686776937607 |
|  | C | 1.71961794047285  | -0.51820768677728 | 0.75482042800299  | C | 1.67407251163025  | -0.57962198852077 | 0.72377529058632  |
|  | C | -1.37354946483572 | 0.86248733903988  | 0.46430907654356  | C | -1.33744221708911 | 0.82588800362155  | 0.38313681815417  |
|  | C | -1.97388277540830 | 0.10828624266498  | -0.53916396650492 | C | -1.91704099230736 | 0.11569157017638  | -0.65750925123104 |
|  | O | -2.94520268899611 | -0.78513369880935 | -0.17822850321667 | O | -2.87764967851145 | -0.80012946623310 | -0.36382582296736 |

|    |   |                   |                   |                   |   |                   |                   |                   |
|----|---|-------------------|-------------------|-------------------|---|-------------------|-------------------|-------------------|
|    | C | -4.19695977801633 | -0.68277833588410 | -0.87300112572736 | C | -4.14599250311118 | -0.58384265569321 | -0.96739801872171 |
|    | C | -1.49755631976061 | 0.20494917196566  | -1.84740722776110 | C | -1.44448320379833 | 0.29085762810653  | -1.95457844039722 |
|    | O | -1.97602701847544 | -0.61094907862400 | -2.82151707550258 | O | -1.93470415365026 | -0.44660767222665 | -2.96878100242390 |
|    | H | 1.91787279581367  | 1.08000426693133  | -3.28294014387853 | H | 1.93660882114629  | 1.71029705841306  | -3.31178059422017 |
|    | H | 1.25112816166807  | 1.43213363037800  | -4.90237440997816 | H | 1.19167669744562  | 1.98022323063335  | -4.90777576545931 |
|    | H | 1.22479596841182  | 2.69750650152547  | -3.65299092032646 | H | 0.89481713948050  | 3.13857964497305  | -3.58826393090406 |
|    | H | 0.92084576388974  | 2.57046228838477  | -1.36995665014294 | H | 0.93029906575788  | 2.65642810917130  | -1.33991872080305 |
|    | H | -0.83128546949846 | -2.47990393228764 | 1.86604104569933  | H | -0.82734058509488 | -2.50185468677058 | 1.97227151062483  |
|    | H | -2.46290240401705 | -4.59160060734913 | -0.66013136707934 | H | -2.37082697054593 | -4.85195959094895 | -0.32109474991315 |
|    | H | -1.56879679124088 | -4.51280769647286 | 0.87901828703466  | H | -1.48744579070608 | -4.57237302797852 | 1.19842868573533  |
|    | H | -2.56833838847724 | -3.11914801575161 | 0.34655710731583  | H | -2.52279775858307 | -3.28086589271647 | 0.51282541954385  |
|    | H | 0.13535931642952  | -2.85542410117546 | -2.46528970946367 | H | 0.25547797754445  | -3.27619516712326 | -2.26519488756991 |
|    | H | 4.27654619733787  | 0.68219206228661  | -1.90346703558179 | H | 4.20829915671865  | 0.45734646232730  | -1.99159921154688 |
|    | H | 4.26500212433335  | 0.01845824578779  | -0.25166351670413 | H | 4.20815430997254  | -0.08593308818366 | -0.29704546081430 |
|    | H | 3.20851670503256  | 1.39873627927441  | -0.66998764783125 | H | 3.11613531646236  | 1.22782381986251  | -0.81411366183534 |
|    | H | 2.38809201275379  | 0.24908557590060  | 1.11956340051327  | H | 2.32999728849451  | 0.22396138801949  | 1.02835589869351  |
|    | H | -1.75005819944580 | 0.74748972254567  | 1.47313331675330  | H | -1.72188657402014 | 0.66065216780312  | 1.38157627308771  |
|    | H | -4.09371591006538 | -0.97114284831929 | -1.91861802200766 | H | -4.08958121987679 | -0.65435201684489 | -2.05458830278511 |
|    | H | -4.58445523725510 | 0.33791827338946  | -0.80492228295181 | H | -4.54195858205199 | 0.39520127410673  | -0.68054645527221 |
|    | H | -4.87616778421631 | -1.36300948017526 | -0.36118627465234 | H | -4.80242823215051 | -1.36331885172982 | -0.58332421923896 |
|    | H | -1.46884148491344 | -0.41299041298684 | -3.62385056771737 | H | -1.43507748337802 | -0.20453191007965 | -3.76024779463770 |
| 3n | N | 0.31251837385041  | -2.51053100926820 | 3.72863480999289  | N | 0.32459741786306  | -2.50528771543365 | 3.70651865469093  |
|    | C | 0.35665628990381  | -2.89079587396141 | 5.07364709530136  | C | 0.38368759887198  | -2.88137814077065 | 5.03739439445757  |
|    | N | 0.24883112274384  | -4.18644917229039 | 5.50413024042178  | N | 0.25898895451383  | -4.16580207471643 | 5.47336817843320  |
|    | N | 0.09295460321832  | -5.12146679672258 | 4.64214190070635  | N | 0.07377352279464  | -5.09050140341670 | 4.62321068467954  |
|    | C | -0.07249368083704 | -4.79449816945145 | 3.32232512631076  | C | -0.10601273517928 | -4.75946204930314 | 3.31398858025053  |
|    | N | -0.37244623626125 | -5.61520554680594 | 2.33620330401331  | N | -0.43471660596022 | -5.57357046747578 | 2.33912298176696  |
|    | N | -0.61823454884469 | -4.86259732848948 | 1.23958401559031  | N | -0.67622601659922 | -4.82693456285973 | 1.25662597241921  |
|    | C | -0.48352196014280 | -3.56776270870805 | 1.52358929513852  | C | -0.51086747644127 | -3.54038804246127 | 1.53342603144083  |
|    | C | -0.79849899661059 | -2.48568243474635 | 0.59828305235109  | C | -0.82493442838250 | -2.46449485706980 | 0.60766502173945  |
|    | C | -1.52877723901824 | -1.36262019989634 | 1.01788454051011  | C | -1.54836543332808 | -1.34429277260567 | 1.02163749820074  |
|    | C | -1.76981029978669 | -0.34562853635483 | 0.11579547898132  | C | -1.80387681440868 | -0.34314071673900 | 0.11212341630974  |
|    | C | -2.48945399977595 | 0.96768073098819  | 0.31949546242677  | C | -2.51724116408031 | 0.96194672881796  | 0.30972795599019  |
|    | C | -2.28617415953994 | 1.66700475039113  | -1.00759522574455 | C | -2.34444043099064 | 1.63878406726752  | -1.02078012485929 |
|    | C | -1.60299604886841 | 0.81834291408494  | -1.90115734138448 | C | -1.66886121951346 | 0.79065584971315  | -1.90936459458230 |
|    | C | -1.30279719120381 | 1.24063643168667  | -3.19410705892555 | C | -1.38231927095673 | 1.20176028729438  | -3.20341974880885 |
|    | C | -1.69304902849529 | 2.51692283031566  | -3.58812770743045 | C | -1.78028630135766 | 2.46745910946456  | -3.60179813109545 |
|    | C | -2.36924232240426 | 3.36016966506543  | -2.70334079143361 | C | -2.45280540695622 | 3.30943593200364  | -2.72210278023394 |
|    | C | -2.66945975113268 | 2.93931558623186  | -1.40565595259321 | C | -2.73934838523530 | 2.90012043184340  | -1.42522640290224 |
|    | C | -1.29163739839933 | -0.43273687124484 | -1.20870226711041 | C | -1.34497821225162 | -0.44627774142862 | -1.21038684356193 |
|    | C | -0.63420926780590 | -1.58119066471305 | -1.64568403272994 | C | -0.69062047334760 | -1.59302052863641 | -1.63987712483779 |
|    | C | -0.39287453815936 | -2.60620130510846 | -0.73905686074615 | C | -0.43579777787362 | -2.60021260168741 | -0.72662958798229 |
|    | N | -0.09217604116320 | -3.48140805614883 | 2.84145429169123  | N | -0.10466980869012 | -3.46047979989640 | 2.83551659323020  |
|    | N | 0.65154455601913  | -1.83616623997201 | 5.80640162742163  | N | 0.70476275439418  | -1.83636084269726 | 5.76288501542454  |
|    | N | 0.83146676568490  | -0.79230347714394 | 4.96542033574889  | N | 0.88524475673788  | -0.80792108637363 | 4.92804484467687  |
|    | C | 0.66069720372208  | -1.17831231243756 | 3.70152748160291  | C | 0.68872032483450  | -1.18903049814901 | 3.67283008320927  |
|    | C | 0.90428733479641  | -0.32913544538824 | 2.54137824319367  | C | 0.93451909411531  | -0.33947715040759 | 2.51911422632777  |
|    | C | 0.45363024703240  | 0.99867764295219  | 2.57514568905186  | C | 0.50499356171091  | 0.98820426020155  | 2.56982840214121  |

|  |   |                   |                   |                   |   |                   |                   |                   |
|--|---|-------------------|-------------------|-------------------|---|-------------------|-------------------|-------------------|
|  | C | 0.62719233389325  | 1.83221387910290  | 1.47698639355954  | C | 0.69287968550178  | 1.83045767659196  | 1.48873666270386  |
|  | C | 1.26228150252500  | 1.33179738336841  | 0.34207682878186  | C | 1.32130939861123  | 1.33644412911794  | 0.35379386258593  |
|  | C | 1.50248131113984  | 1.93567659368926  | -0.96905581159726 | C | 1.57177112457030  | 1.94852712472475  | -0.94432244423292 |
|  | C | 1.13796169675083  | 3.18045727046119  | -1.47679979763766 | C | 1.22336399328052  | 3.19749789940681  | -1.43851797216725 |
|  | C | 1.46563071563935  | 3.48718262433876  | -2.79404054645668 | C | 1.55421595552306  | 3.50994555850558  | -2.74697822135517 |
|  | C | 2.14374094831982  | 2.56369006224329  | -3.59310143460300 | C | 2.22204350909728  | 2.58997380588199  | -3.54869730349579 |
|  | C | 2.50865955065123  | 1.31418946115448  | -3.08626793030114 | C | 2.57166862899980  | 1.33847405839745  | -3.05543866201304 |
|  | C | 2.18797071462812  | 1.00345990567243  | -1.77292877602581 | C | 2.24350513555883  | 1.01960580526270  | -1.75108812821482 |
|  | C | 2.46693937832406  | -0.25725942768321 | -0.98252129985151 | C | 2.49207900155340  | -0.24794739650888 | -0.98275040555359 |
|  | C | 1.78557209022353  | 0.02154011695067  | 0.33755161765060  | C | 1.82150630470724  | 0.02506088198666  | 0.33169100345076  |
|  | C | 1.61125158429576  | -0.80833004769289 | 1.42726091668426  | C | 1.63159884821207  | -0.81420556763693 | 1.40636776871213  |
|  | H | -1.88654475273927 | -1.29263459151734 | 2.03979595084902  | H | -1.89414220223988 | -1.26235873529847 | 2.04636658218473  |
|  | H | -3.55398763635718 | 0.80909418869157  | 0.52996114562791  | H | -3.57539616599028 | 0.80600011471577  | 0.54835675425405  |
|  | H | -2.07979992711960 | 1.53227703972724  | 1.16107976558708  | H | -2.08667070405173 | 1.54028966333884  | 1.13180067207051  |
|  | H | -0.75588372441510 | 0.59985019853065  | -3.87706203981105 | H | -0.84341299969280 | 0.55608260390061  | -3.88698485781692 |
|  | H | -1.45787112774514 | 2.86586395187909  | -4.58782687797006 | H | -1.55741341692131 | 2.80975873701936  | -4.60537835442744 |
|  | H | -2.66208284778013 | 4.35359772347803  | -3.02712816691420 | H | -2.75433350892803 | 4.29688854253372  | -3.05173346820977 |
|  | H | -3.19649361961519 | 3.60045089351975  | -0.72414166045389 | H | -3.26287184274331 | 3.56372981435045  | -0.74549060304035 |
|  | H | -0.29437586956619 | -1.67092073678559 | -2.67194086371041 | H | -0.36456349300143 | -1.69531051180532 | -2.66850916064405 |
|  | H | 0.12866752662224  | -3.50495056739013 | -1.04611095473948 | H | 0.08362643516122  | -3.50190667663171 | -1.02713327808166 |
|  | H | -0.04870441524204 | 1.35550861970553  | 3.46643197058481  | H | 0.00744633799120  | 1.33913050167893  | 3.46557523050761  |
|  | H | 0.25188525881674  | 2.84973217233500  | 1.50127919476193  | H | 0.33381554222079  | 2.85248757522209  | 1.52570620665177  |
|  | H | 0.58909985444648  | 3.89160751474817  | -0.86923058090352 | H | 0.68808687429684  | 3.91101661538634  | -0.82295686516221 |
|  | H | 1.17937651224182  | 4.44754664922081  | -3.20897752482610 | H | 1.28173268737938  | 4.47639506257791  | -3.15404908295629 |
|  | H | 2.38686889281942  | 2.81881788280230  | -4.61940685221452 | H | 2.47006821974893  | 2.85179828940061  | -4.57074702675233 |
|  | H | 3.03636430008474  | 0.60201412683113  | -3.71367504090489 | H | 3.09117772462100  | 0.62703596135355  | -3.68824451935432 |
|  | H | 3.54382781744893  | -0.41544818573928 | -0.84832985366094 | H | 3.56383422122828  | -0.43623930189432 | -0.85266663889183 |
|  | H | 2.07185106542134  | -1.15467637413142 | -1.46567235816883 | H | 2.07221142140893  | -1.12727749523382 | -1.47884872824788 |
|  | H | 2.00348707776549  | -1.81990673037485 | 1.42067983430752  | H | 2.00804325961295  | -1.83118835082261 | 1.38719778097154  |
|  | N | 0.61489001784699  | -1.91364225610356 | -0.37203897887279 | N | 0.60830028487241  | -1.90237468449775 | -0.36679991640851 |
|  | C | 1.21127796630728  | -3.10700709162531 | -0.78636872394202 | C | 1.19911542972500  | -3.08589663686333 | -0.77046481157452 |
|  | N | 0.50139003275751  | -4.22593109014055 | -1.13695719613182 | N | 0.49792275213511  | -4.19982063158752 | -1.12511641455202 |
|  | N | -0.77908996412759 | -4.19698146330896 | -1.09009750585145 | N | -0.77116900602281 | -4.16955886947632 | -1.08652755335479 |
|  | C | -1.41362019375485 | -3.01579062105526 | -0.80573221716939 | C | -1.39852893446930 | -2.99147473573102 | -0.80951895025936 |
|  | N | -2.70714240905148 | -2.76843187924319 | -0.87495263773159 | N | -2.68628580465612 | -2.74699951535413 | -0.88618946650086 |
|  | N | -2.87835070788422 | -1.43618778753711 | -0.72592084435179 | N | -2.85625438585967 | -1.43003236961890 | -0.73839699956100 |
|  | C | -1.69862574165752 | -0.83279294959537 | -0.57072332523778 | C | -1.68392061272416 | -0.82934564257222 | -0.57308228611936 |
|  | C | -1.49526553935213 | 0.59478130933451  | -0.54200885033012 | C | -1.49345266523260 | 0.59723016652174  | -0.54790683203233 |
|  | C | -0.51506311673035 | 1.32919966236956  | -1.16486505298450 | C | -0.52728943036401 | 1.33778106959783  | -1.17969003849051 |
|  | C | -0.63972431691395 | 2.72223044757942  | -0.93064574728237 | C | -0.68289845439546 | 2.72152095403587  | -0.96499322014421 |
|  | C | -1.71661475832442 | 3.02685053759905  | -0.14351505888849 | C | -1.76745951172736 | 3.00591278029349  | -0.18386436981422 |
|  | S | -2.60675733706373 | 1.62213490949896  | 0.32243198701269  | S | -2.60346116877801 | 1.60267077487446  | 0.28732671833998  |
|  | N | -0.73886710802767 | -1.81773589643317 | -0.55967675487515 | N | -0.73147497604543 | -1.80635373268127 | -0.55924752950860 |
|  | N | 2.51611174077138  | -3.00896237382643 | -0.62216094323784 | N | 2.74807860546091  | -1.79906904144654 | -0.60020106669113 |
|  | N | 2.77026016840566  | -1.80187833477558 | -0.07004425780914 | N | 2.74807860546091  | -1.79906904144654 | -0.05439275811945 |
|  | C | 1.63196337213694  | -1.13401124984645 | 0.12638739415729  | C | 1.61634416692625  | -1.12987416790156 | 0.13118081329438  |
|  | C | 1.51664638891616  | 0.11493902429010  | 0.83837090923625  | C | 1.51363838976857  | 0.11488614331248  | 0.84640066289170  |
|  | C | 0.57248569502297  | 0.48558683122408  | 1.76547847537023  | C | 0.58028219881686  | 0.48948768661144  | 1.77899524180036  |

30



|    |                   |                   |                   |                   |                   |                   |                   |                   |
|----|-------------------|-------------------|-------------------|-------------------|-------------------|-------------------|-------------------|-------------------|
|    | C                 | 0.78919564234819  | 1.78946976342927  | 2.27927656778296  | C                 | 0.83023870143833  | 1.77208363633590  | 2.30599677315358  |
|    | C                 | 1.89920360931904  | 2.38520309008897  | 1.74521950998505  | C                 | 1.95207028235248  | 2.34165764377864  | 1.77278498650068  |
|    | S                 | 2.70752199635185  | 1.36686116428670  | 0.60870039324580  | S                 | 2.70865764356145  | 1.32699807201175  | 0.63808867407144  |
|    | H                 | 0.26404696651786  | 0.88739360656810  | -1.77220906166789 | H                 | 0.25945763254132  | 0.90292881317515  | -1.78138431653018 |
|    | H                 | 0.03755900009490  | 3.46393606622550  | -1.33276936810861 | H                 | -0.02651605550825 | 3.47513423213261  | -1.37699651314661 |
|    | H                 | -2.05161247665475 | 4.00129617864604  | 0.17991266976888  | H                 | -2.12491434512610 | 3.97565576220645  | 0.12730390350984  |
|    | H                 | -0.24437898216427 | -0.15447521370592 | 2.07221436359703  | H                 | -0.24845387055091 | -0.13712745520618 | 2.07985074698323  |
|    | H                 | 0.15170921564221  | 2.26061379222729  | 3.01569451209756  | H                 | 0.21170458093485  | 2.25024819240665  | 3.05256653193242  |
|    | H                 | 2.30085083926798  | 3.36363182382930  | 1.96379974221898  | H                 | 2.37857659561420  | 3.30655987383603  | 2.00107799033006  |
| 3p | N                 | -0.57918570974499 | -0.98588046831398 | 1.48486808757432  | N                 | -0.57496653417491 | -0.98372345752440 | 1.47428808536899  |
|    | C                 | -0.98390475918649 | -1.55303487845951 | 2.69750907838102  | C                 | -0.97872109982360 | -1.54691799573961 | 2.67268129497058  |
|    | N                 | -0.55047779030656 | -2.77039367754220 | 3.15207570772787  | N                 | -0.54878247069592 | -2.75631197979154 | 3.12948122159563  |
|    | N                 | 0.27562928001545  | -3.44601018801252 | 2.44348859969025  | N                 | 0.27261784316800  | -3.42441069908335 | 2.42891603212691  |
|    | C                 | 0.78854404306091  | -2.89081466744307 | 1.30123638204311  | C                 | 0.78377799486388  | -2.86641693058670 | 1.29622893972843  |
|    | N                 | 1.74502296623511  | -3.38465715553305 | 0.54155667639336  | N                 | 1.73809069665566  | -3.35834387849531 | 0.54222577639740  |
|    | N                 | 2.07331367127595  | -2.44018035115905 | -0.36855682849228 | N                 | 2.06239926992824  | -2.42418770453860 | -0.35680457465913 |
|    | C                 | 1.33336259948985  | -1.34640472633851 | -0.18878014075255 | C                 | 1.32277976765846  | -1.33674462011809 | -0.18153544525380 |
|    | C                 | 1.51765325697755  | -0.10551854429768 | -0.91968774727714 | C                 | 1.52240179225856  | -0.10298555861512 | -0.91164709162649 |
|    | C                 | 1.79155741076412  | -0.09108780785043 | -2.26450346907707 | C                 | 1.82522191016116  | -0.09862616179177 | -2.24841824672852 |
|    | S                 | 2.01422094309339  | 1.51127277350989  | -2.85192224282189 | S                 | 2.08389200807937  | 1.47545163586512  | -2.82045572851054 |
|    | C                 | 1.76388654615618  | 2.17749013678262  | -1.26888387641166 | C                 | 1.81561386209784  | 2.15753534079148  | -1.27848279128738 |
|    | C                 | 1.52011845507030  | 1.20860189070711  | -0.34563637362429 | C                 | 1.53234855796288  | 1.20470049625356  | -0.35111899825318 |
|    | N                 | 0.46593885560599  | -1.60831994551636 | 0.84654920633179  | N                 | 0.46183773599739  | -1.59817543139134 | 0.84454249391404  |
|    | N                 | -1.92830292890931 | -0.80156014146262 | 3.22577092231711  | N                 | -1.91926289467522 | -0.79957372445408 | 3.19990685827770  |
|    | N                 | -2.16874157296176 | 0.21595734410337  | 2.36859458580328  | N                 | -2.15475871923312 | 0.20748009913224  | 2.35348466808298  |
|    | C                 | -1.38529371807083 | 0.11324817466567  | 1.29524590742816  | C                 | -1.37288767874692 | 0.10779231947356  | 1.28607394522707  |
|    | C                 | -1.47752565349659 | 0.97832533559021  | 0.13222150625542  | C                 | -1.48075381666783 | 0.97195959537931  | 0.12917618700197  |
|    | C                 | -1.69352307118565 | 2.32871185873311  | 0.25092804742169  | C                 | -1.72505717475291 | 2.31490022146030  | 0.25487440641258  |
|    | S                 | -1.81533430313078 | 3.09254839215237  | -1.28657114741389 | S                 | -1.88765123684205 | 3.06099630606129  | -1.25816591202442 |
| C  | -1.60057444743095 | 1.57895473869290  | -2.10819408499991 | C                 | -1.65477112716485 | 1.58823020575359  | -2.08932017036037 |                   |
| C  | -1.44175664753614 | 0.54770389518043  | -1.23517093782510 | C                 | -1.45516601614941 | 0.55332309127016  | -1.23046919388413 |                   |
| H  | 1.86797938012932  | -0.94286781875480 | -2.92255757287168 | H                 | 1.90175432125067  | -0.95583966660197 | -2.89897540886677 |                   |
| H  | 1.82233466105580  | 3.24415700002951  | -1.11662447972018 | H                 | 1.88897875104502  | 3.22370652987774  | -1.13194288824721 |                   |
| H  | 1.35730937325926  | 1.41231743077419  | 0.70373821463565  | H                 | 1.34898031876001  | 1.42297664783863  | 0.69157303265290  |                   |
| H  | -1.78160708044966 | 2.89556533270762  | 1.16482401780410  | H                 | -1.81236096903212 | 2.87429893930325  | 1.17321363536145  |                   |
| H  | -1.61573425853035 | 1.54269227950445  | -3.18655606311378 | H                 | -1.68726530379399 | 1.55728721148540  | -3.16704991550555 |                   |
| H  | -1.31470950124912 | -0.48051621244968 | -1.54496197540573 | H                 | -1.30808978813425 | -0.46808083121376 | -1.55228021191116 |                   |

## References

- 1 D. E. Chavez and M. A. Hiskey, *J. Heterocycl. Chem.*, 1998, **35**, 1329–1332.
- 2 V. V. Malov, T. Ghosh, V. C. Nair, M. M. Maslov, K. P. Katin, K. N. N. Unni and A. R. Tameev, *Mendeleev Commun.*, 2019, **29**, 218–219.
- 3 F. Neese, *Wiley Interdiscip. Rev. Comput. Mol. Sci.*, 2022, **12**, 1–15.
- 4 A. V. Marenich, C. J. Cramer and D. G. Truhlar, *J. Phys. Chem. B*, 2009, **113**, 6378–6396.
- 5 G. M. Sheldrick, *Acta Crystallogr. Sect. A Found. Crystallogr.*, 2015, **71**, 3–8.
- 6 G. M. Sheldrick, *Acta Crystallogr. Sect. C Struct. Chem.*, 2015, **71**, 3–8.
- 7 I. N. Ganebnykh, R. I. Ishmetova, S. G. Tolshchina, A. V. Korotina, D. S. Filatov, P. A. Slepukhin and G. L. Rusinov, *Russ. Chem. Bull. Vol.*, 2018, 1716–1723.
- 8 K. Vandewal, J. Benduhn and V. C. Nikolis, *Sustain. Energy Fuels*, 2018, **2**, 538–544.
